# Supplementary material
Source: PubMed Central journal article supplement (PMC8035236)
Supplement: NIHMS1675253-supplement-Supplemental_Material.pdf [file NIHMS1675253-supplement-Supplemental_Material.pdf]

## ONLINE SUPPLEMENT

### **Comprehensive comparative effectiveness and safety of first-line beta-blocker monotherapy in hypertensive patients: a large-scale multi-center observational study**

Seng Chan You, MD, MS<sup>1,2</sup>; Harlan M. Krumholz, MD, MS<sup>3,4</sup>; Marc A. Suchard, MD, PhD<sup>5,6</sup>; Martijn J. Schuemie, PhD<sup>5,7</sup>; George Hripcsak, MD<sup>8,9</sup>; RuiJun Chen, MD<sup>8,10</sup>; Steven Shea, MD<sup>8,11</sup>; Jon Duke, MD<sup>12</sup>; Nicole Pratt, PhD<sup>13</sup>; Christian G. Reich, MD, PhD<sup>14</sup>; David Madigan, PhD<sup>15</sup>; Patrick B. Ryan, PhD<sup>7,8</sup>; Rae Woong Park, MD, PhD<sup>1,16,\*</sup>; Sungha Park, MD, PhD<sup>17,\*</sup>

\*Co-corresponding authors

<sup>1</sup>Department of Biomedical Informatics, Ajou University School of Medicine, Suwon, Korea

<sup>2</sup>Department of Preventive Medicine and Public Health, Yonsei University College of Medicine, Seoul, Korea

<sup>3</sup>Section of Cardiovascular Medicine, Department of Medicine, Yale University School of Medicine, New Haven, CT, USA

<sup>4</sup>Center for Outcomes Research and Evaluation, Yale-New Haven Hospital, New Haven, CT, USA

<sup>5</sup>Department of Biostatistics, Fielding School of Public Health, University of California, Los Angeles, CA, USA

<sup>6</sup>Department of Biomathematics, David Geffen School of Medicine at UCLA, University of California, Los Angeles, CA, USA

<sup>7</sup>Janssen Research and Development, Titusville, NJ, USA

<sup>8</sup>Department of Biomedical Informatics, Columbia University Irving Medical Center, New York, NY, USA

<sup>9</sup>Medical Informatics Services, New York-Presbyterian Hospital, New York, NY, USA

<sup>10</sup>Department of Medicine, Weill Cornell Medical College, New York, NY, USA

<sup>11</sup>Department of Medicine, Vagelos College of Physicians & Surgeons, Columbia University, New York, NY, USA

<sup>12</sup>Georgia Tech Research Institute, Georgia Tech College of Computing, Atlanta, GA, USA

<sup>13</sup>Quality Use of Medicines and Pharmacy Research Centre, Clinical and Health Sciences, University of South Australia, Adelaide, SA, Australia

<sup>14</sup>Real World Solutions, IQVIA, Cambridge, MA, USA

<sup>15</sup>Department of Statistics, Columbia University, New York, NY, USA

<sup>16</sup>Department of Biomedical Sciences, Ajou University Graduate School of Medicine, Suwon, Korea

<sup>17</sup>Division of Cardiology, Severance Cardiovascular Hospital and Integrated Research Center for Cerebrovascular and Cardiovascular diseases, Yonsei University College of Medicine, Seoul, Korea

#### **Address for co-correspondence:**

Rae Woong Park, MD, PhD

Department of Biomedical Informatics, Ajou University School of Medicine, 164, World cup-ro, Yeongtong-gu, Suwon-si, Gyeonggi-do 16499, Republic of Korea

Tel: +82-31-219-4471, Fax: +82-219-4472

E-mail: veritas@ajou.ac.kr

Sungha Park, MD, PhD

Division of Cardiology, Severance Cardiovascular Hospital and Integrated Research Center for Cerebrovascular and Cardiovascular diseases, Yonsei University College of Medicine, 50-1 Yonsei-ro, Seodaemun-gu, Seoul 03722, Republic of Korea

Tel: +82-2-2228-8455, Fax: +82-2-393-2041

E-mail: shpark0530@yuhs.ac

## Supplementary Online Content

|                                                                                                                                                                                                                                                                                          |    |
|------------------------------------------------------------------------------------------------------------------------------------------------------------------------------------------------------------------------------------------------------------------------------------------|----|
| Methods. Data Source.....                                                                                                                                                                                                                                                                | 3  |
| Table S1. Baseline characteristics between carvedilol and atenolol.....                                                                                                                                                                                                                  | 4  |
| Table S2. Baseline characteristics between nebivolol and atenolol.....                                                                                                                                                                                                                   | 20 |
| Table S3. Hazard ratios of carvedilol and nebivolol compared to atenolol after excluding patients with previous history of heart failure, ischemic heart disease, or atrial fibrillation (Propensity score matching, on-treatment).36                                                    |    |
| Table S4. Meta-analytic hazard ratios of carvedilol and nebivolol compared to atenolol using propensity scores without and with baseline blood pressure adjustment in the Optum® de-identified Electronic Health Record Dataset database (Propensity score matching, on-treatment) ..... | 38 |
| Table S5. Meta-analytic hazard ratios of nebivolol compared to atenolol and other classes for primary outcomes (Propensity score matching, on-treatment).....                                                                                                                            | 39 |
| Figure S1. Covariate balance plot before and after propensity score matching between carvedilol and atenolol                                                                                                                                                                             | 40 |
| Figure S2. Covariate balance plot before and after propensity score matching between nebivolol and atenolol .                                                                                                                                                                            | 41 |
| Figure S3. Preference score distribution before propensity score adjustment between carvedilol and atenolol...                                                                                                                                                                           | 42 |
| Figure S4. Preference score distribution before propensity score adjustment between nebivolol and atenolol ...                                                                                                                                                                           | 43 |
| Figure S5. Systematic error control of effect estimation comparing the third-generation beta-blockers (carvedilol and nebivolol) and atenolol users in the meta-analysis under an on-treatment, PS-matching design.....                                                                  | 44 |
| Figure S6. Kaplan-Meier plots for acute myocardial infarction between the third-generation beta-blockers users and atenolol users .....                                                                                                                                                  | 45 |
| Figure S7. Kaplan-Meier plots for stroke between the third-generation beta-blockers users and atenolol users .                                                                                                                                                                           | 48 |
| Figure S8. Kaplan-Meier plots for hospitalization for heart failure the third-generation beta-blockers users and atenolol users .....                                                                                                                                                    | 51 |
| Figure S9. The meta-analytic HR estimates and their 95% CIs comparing the relative risk of acute myocardial infarction, stroke, and hospitalization for heat failure between third-generation beta-blockers and atenolol (PS stratification or ITT) .....                                | 54 |
| Figure S10 Meta-analysis including results without sufficient balance or empirical equipoise between third-generation beta-blockers and atenolol .....                                                                                                                                   | 56 |
| Figure S11. The meta-analytic HR estimates and their 95% CIs comparing the relative risk of acute myocardial infarction, stroke, and hospitalization for heat failure between atenolol versus other classes (PS matching, on-treatment).....                                             | 58 |
| Figure S12. The meta-analytic HR estimates and their 95% CIs comparing the relative risk of acute myocardial infarction, stroke, and hospitalization for heat failure between third-generation beta-blockers versus other classes (PS matching, on-treatment) .....                      | 61 |
| Figure S13. The meta-analytic HR estimates and their 95% CIs comparing the relative risk of acute myocardial infarction, stroke, and hospitalization for heat failure between metoprolol versus atenolol, carvedilol, and nebivolol (PS matching, on-treatment).....                     | 64 |
| Figure S14. Meta-analytic results of secondary outcomes comparing nebivolol versus atenolol and other classes .....                                                                                                                                                                      | 66 |

## **Methods. Data Source**

### **Truven MarketScan Commercial Claims and Encounters (CCAE)**

Truven Health MarketScan® Commercial Claims and Encounters Database (CCAE) represent data from individuals enrolled in United States employer-sponsored insurance health plans. The data includes adjudicated health insurance claims (e.g. inpatient, outpatient, and outpatient pharmacy) as well as enrollment data from large employers and health plans who provide private healthcare coverage to employees, their spouses, and dependents. Additionally, it captures laboratory tests for a subset of the covered lives. This administrative claims database includes a variety of fee-for-service, preferred provider organizations, and capitated health plans.

### **Optum ClinFormatics (Optum)**

Optum Clinformatics Extended DataMart is an adjudicated US administrative health claims database for members of private health insurance, who are fully insured in commercial plans or in administrative services only (ASOs), Legacy Medicare Choice Lives (prior to January 2006), and Medicare Advantage (Medicare Advantage Prescription Drug coverage starting January 2006). The population is primarily representative of commercial claims patients (0-65 years old) with some Medicare (65+ years old) however ages are capped at 90 years. It includes data captured from administrative claims processed from inpatient and outpatient medical services and prescriptions as dispensed, as well as results for outpatient lab tests processed by large national lab vendors who participate in data exchange with Optum. This dataset also provides date of death (month and year only) for members with both medical and pharmacy coverage from the Social Security Death Master File (however after 2011 reporting frequency changed due to changes in reporting requirements) and location information for patients is at the US state level.

### **Optum® de-identified Electronic Health Record Dataset (PanTher)**

Optum® de-identified Electronic Health Record Dataset represents Humedica's Electronic Health Record data a medical records database. The medical record data includes clinical information, inclusive of prescriptions as prescribed and administered, lab results, vital signs, body measurements, diagnoses, procedures, and information derived from clinical Notes using Natural Language Processing (NLP).

**Table S1. Baseline characteristics between carvedilol and atenolol****Table S1 a. Baseline characteristics for carvedilol and atenolol new-users in the CCAE database before and after propensity score matching**

| Characteristic                           | Before matching  |                |              | After matching   |                |              |
|------------------------------------------|------------------|----------------|--------------|------------------|----------------|--------------|
|                                          | Carvedilol,<br>% | Atenolol,<br>% | Std.<br>diff | Carvedilol,<br>% | Atenolol,<br>% | Std.<br>diff |
| Age group                                |                  |                |              |                  |                |              |
| 10-14                                    | 0.0              | 0.2            | -0.05        | 0.0              | 0.1            | -0.04        |
| 15-19                                    | 0.4              | 0.9            | -0.07        | 0.4              | 0.5            | -0.01        |
| 20-24                                    | 1.1              | 1.7            | -0.05        | 1.2              | 1.3            | -0.01        |
| 25-29                                    | 2.3              | 3.0            | -0.04        | 2.6              | 2.6            | 0.00         |
| 30-34                                    | 4.1              | 5.3            | -0.06        | 4.5              | 4.6            | 0.00         |
| 35-39                                    | 6.7              | 8.1            | -0.06        | 7.5              | 7.2            | 0.01         |
| 40-44                                    | 9.6              | 11.7           | -0.07        | 10.2             | 10.3           | 0.00         |
| 45-49                                    | 15.0             | 15.7           | -0.02        | 15.5             | 15.3           | 0.01         |
| 50-54                                    | 18.1             | 18.0           | 0.00         | 18.0             | 17.8           | 0.00         |
| 55-59                                    | 20.3             | 17.9           | 0.06         | 19.4             | 19.6           | 0.00         |
| 60-64                                    | 20.5             | 15.9           | 0.12         | 18.9             | 19.0           | 0.00         |
| 65-69                                    | 2.0              | 1.5            | 0.03         | 1.8              | 1.8            | 0.00         |
| 70-74                                    | 0.0              | 0.0            | -0.02        | 0.0              | 0.0            | 0.01         |
| Gender: female                           | 42.5             | 51.2           | -0.18        | 45.3             | 45.2           | 0.00         |
| Medical history: General                 |                  |                |              |                  |                |              |
| Acute respiratory disease                | 28.1             | 24.6           | 0.08         | 27.3             | 27.6           | -0.01        |
| Attention deficit hyperactivity disorder | 1.2              | 1.1            | 0.02         | 1.3              | 1.3            | -0.01        |
| Chronic liver disease                    | 2.1              | 1.4            | 0.05         | 1.8              | 1.9            | -0.01        |
| Chronic obstructive lung disease         | 5.0              | 1.8            | 0.18         | 3.6              | 3.7            | -0.01        |
| Crohn's disease                          | 0.5              | 0.3            | 0.03         | 0.5              | 0.4            | 0.02         |
| Dementia                                 | 0.3              | 0.2            | 0.02         | 0.3              | 0.2            | 0.01         |
| Depressive disorder                      | 9.7              | 8.6            | 0.04         | 9.6              | 9.8            | -0.01        |
| Diabetes mellitus                        | 16.2             | 6.2            | 0.32         | 12.9             | 13.5           | -0.02        |
| Gastroesophageal reflux disease          | 12.2             | 7.9            | 0.14         | 11.2             | 11.5           | -0.01        |
| Gastrointestinal hemorrhage              | 2.7              | 2.1            | 0.04         | 2.5              | 2.4            | 0.01         |
| Human immunodeficiency virus infection   | 0.3              | 0.2            | 0.02         | 0.3              | 0.3            | 0.00         |
| Hyperlipidemia                           | 45.9             | 29.6           | 0.34         | 41.5             | 42.8           | -0.03        |
| Hypertensive disorder                    | 100.0            | 100.0          | 0.00         | 100.0            | 100.0          | 0.00         |
| Lesion of liver                          | 0.9              | 0.3            | 0.07         | 0.6              | 0.6            | 0.01         |
| Obesity                                  | 10.2             | 5.7            | 0.17         | 8.7              | 9.2            | -0.02        |
| Osteoarthritis                           | 15.6             | 11.4           | 0.12         | 14.8             | 15.4           | -0.02        |
| Pneumonia                                | 3.9              | 1.6            | 0.14         | 2.7              | 2.6            | 0.00         |
| Psoriasis                                | 1.1              | 0.9            | 0.02         | 1.1              | 1.0            | 0.00         |
| Renal impairment                         | 4.5              | 0.8            | 0.23         | 2.4              | 2.4            | 0.00         |
| Rheumatoid arthritis                     | 1.2              | 0.9            | 0.03         | 1.1              | 1.2            | -0.01        |
| Schizophrenia                            | 0.1              | 0.1            | 0.00         | 0.1              | 0.1            | -0.01        |
| Ulcerative colitis                       | 0.5              | 0.3            | 0.02         | 0.4              | 0.4            | 0.01         |
| Urinary tract infectious disease         | 7.0              | 6.3            | 0.02         | 6.6              | 6.8            | -0.01        |
| Viral hepatitis C                        | 0.6              | 0.5            | 0.02         | 0.5              | 0.5            | 0.00         |
| Visual system disorder                   | 16.5             | 15.0           | 0.04         | 16.2             | 16.6           | -0.01        |
| Medical history: Cardiovascular disease  |                  |                |              |                  |                |              |
| Atrial fibrillation                      | 4.1              | 1.4            | 0.16         | 2.9              | 3.2            | -0.02        |
| Cerebrovascular disease                  | 3.8              | 1.7            | 0.13         | 3.1              | 3.2            | -0.01        |
| Coronary arteriosclerosis                | 20.9             | 4.4            | 0.51         | 13.0             | 13.6           | -0.02        |
| Heart disease                            | 45.0             | 16.1           | 0.66         | 33.7             | 35.7           | -0.04        |

|                                                          |      |      |      |      |      |       |
|----------------------------------------------------------|------|------|------|------|------|-------|
| Heart failure                                            | 6.9  | 0.5  | 0.34 | 2.4  | 2.3  | 0.00  |
| Ischemic heart disease                                   | 18.8 | 3.8  | 0.49 | 11.0 | 11.4 | -0.01 |
| Peripheral vascular disease                              | 10.5 | 4.3  | 0.24 | 8.1  | 8.6  | -0.02 |
| Pulmonary embolism                                       | 0.8  | 0.3  | 0.08 | 0.5  | 0.7  | -0.03 |
| Venous thrombosis                                        | 2.4  | 1.1  | 0.10 | 1.7  | 1.8  | -0.01 |
| Medical history: Neoplasms                               |      |      |      |      |      |       |
| Hematologic neoplasm                                     | 1.4  | 0.6  | 0.08 | 1.2  | 1.1  | 0.01  |
| Malignant lymphoma                                       | 0.4  | 0.2  | 0.03 | 0.4  | 0.3  | 0.00  |
| Malignant neoplasm of anorectum                          | 0.3  | 0.1  | 0.03 | 0.2  | 0.2  | 0.01  |
| Malignant neoplastic disease                             | 6.6  | 4.9  | 0.07 | 6.1  | 6.2  | 0.00  |
| Malignant tumor of breast                                | 1.2  | 1.1  | 0.02 | 1.2  | 1.1  | 0.01  |
| Malignant tumor of colon                                 | 0.4  | 0.3  | 0.03 | 0.4  | 0.4  | 0.00  |
| Malignant tumor of lung                                  | 0.4  | 0.2  | 0.04 | 0.3  | 0.4  | -0.01 |
| Malignant tumor of urinary bladder                       | 0.2  | 0.1  | 0.00 | 0.1  | 0.2  | -0.01 |
| Primary malignant neoplasm of prostate                   | 0.6  | 0.5  | 0.01 | 0.6  | 0.7  | -0.01 |
| Medication use                                           |      |      |      |      |      |       |
| Antibacterials for systemic use                          | 51.1 | 48.9 | 0.04 | 50.9 | 51.6 | -0.02 |
| Antidepressants                                          | 21.5 | 21.3 | 0.00 | 22.0 | 21.9 | 0.00  |
| Antiepileptics                                           | 10.1 | 7.4  | 0.09 | 9.8  | 9.9  | 0.00  |
| Antiinflammatory and antirheumatic products              | 25.5 | 24.5 | 0.02 | 25.5 | 25.8 | -0.01 |
| Antineoplastic agents                                    | 2.2  | 1.6  | 0.05 | 2.0  | 2.1  | -0.01 |
| Antipsoriatics                                           | 0.5  | 0.4  | 0.01 | 0.5  | 0.4  | 0.01  |
| Antithrombotic agents                                    | 18.2 | 4.5  | 0.44 | 11.1 | 11.6 | -0.01 |
| Drugs for acid related disorders                         | 20.0 | 16.7 | 0.09 | 19.1 | 19.3 | -0.01 |
| Drugs for obstructive airway diseases                    | 18.9 | 16.1 | 0.07 | 18.5 | 18.6 | 0.00  |
| Drugs used in diabetes                                   | 10.6 | 3.7  | 0.27 | 8.2  | 8.7  | -0.02 |
| Immunosuppressants                                       | 2.2  | 1.5  | 0.05 | 2.0  | 2.0  | 0.00  |
| Lipid modifying agents                                   | 33.7 | 18.7 | 0.34 | 27.6 | 28.8 | -0.03 |
| Opioids                                                  | 23.9 | 16.6 | 0.18 | 21.6 | 22.0 | -0.01 |
| Psycholeptics                                            | 27.2 | 23.9 | 0.08 | 26.3 | 26.7 | -0.01 |
| Psychostimulants, agents used for ADHD and<br>nootropics | 3.6  | 3.5  | 0.00 | 3.8  | 4.0  | -0.01 |

CCAE, Truven MarketScan Commercial Claims and Encounters

**Table S1 b. Baseline characteristics for carvedilol and atenolol new-users in the Optum database before and after propensity score matching**

| Characteristic                           | Before matching  |                |              | After matching   |                |              |
|------------------------------------------|------------------|----------------|--------------|------------------|----------------|--------------|
|                                          | Carvedilol,<br>% | Atenolol,<br>% | Std.<br>diff | Carvedilol,<br>% | Atenolol,<br>% | Std.<br>diff |
| Age group                                |                  |                |              |                  |                |              |
| 15-19                                    | 0.2              | 0.5            | -0.05        | 0.2              | 0.4            | -0.03        |
| 20-24                                    | 0.4              | 0.9            | -0.07        | 0.5              | 0.6            | -0.01        |
| 25-29                                    | 1.2              | 2.3            | -0.09        | 1.5              | 1.5            | 0.00         |
| 30-34                                    | 2.0              | 4.1            | -0.12        | 2.4              | 2.4            | 0.00         |
| 35-39                                    | 3.5              | 6.5            | -0.14        | 4.3              | 4.2            | 0.01         |
| 40-44                                    | 5.7              | 9.2            | -0.14        | 6.7              | 6.4            | 0.01         |
| 45-49                                    | 8.0              | 12.2           | -0.14        | 9.3              | 9.0            | 0.01         |
| 50-54                                    | 10.6             | 13.4           | -0.08        | 11.6             | 11.3           | 0.01         |
| 55-59                                    | 11.4             | 13.0           | -0.05        | 11.8             | 11.6           | 0.01         |
| 60-64                                    | 12.0             | 10.5           | 0.05         | 11.6             | 11.7           | 0.00         |
| 65-69                                    | 12.6             | 8.6            | 0.13         | 12.0             | 12.1           | 0.00         |
| 70-74                                    | 11.5             | 7.6            | 0.13         | 10.3             | 10.3           | 0.00         |
| 75-79                                    | 9.5              | 6.3            | 0.12         | 8.5              | 8.8            | -0.01        |
| 80-84                                    | 7.5              | 3.6            | 0.17         | 6.4              | 6.8            | -0.02        |
| 85-89                                    | 4.0              | 1.2            | 0.18         | 2.9              | 2.9            | 0.00         |
| Gender: female                           | 40.0             | 51.6           | -0.24        | 43.8             | 43.3           | 0.01         |
| Medical history: General                 |                  |                |              |                  |                |              |
| Acute respiratory disease                | 28.6             | 24.7           | 0.09         | 26.3             | 26.7           | -0.01        |
| Attention deficit hyperactivity disorder | 0.9              | 0.9            | 0.00         | 1.0              | 0.9            | 0.01         |
| Chronic liver disease                    | 2.2              | 1.5            | 0.05         | 2.1              | 2.1            | 0.00         |
| Chronic obstructive lung disease         | 13.6             | 4.3            | 0.33         | 9.4              | 9.9            | -0.02        |
| Crohn's disease                          | 0.5              | 0.4            | 0.01         | 0.4              | 0.4            | -0.01        |
| Dementia                                 | 3.3              | 1.2            | 0.15         | 2.4              | 2.5            | -0.01        |
| Depressive disorder                      | 12.1             | 10.6           | 0.05         | 11.6             | 11.8           | -0.01        |
| Diabetes mellitus                        | 26.5             | 10.2           | 0.43         | 20.9             | 22.1           | -0.03        |
| Gastroesophageal reflux disease          | 17.5             | 11.7           | 0.16         | 15.9             | 16.4           | -0.01        |
| Gastrointestinal hemorrhage              | 4.1              | 3.0            | 0.06         | 3.5              | 3.6            | -0.01        |
| Human immunodeficiency virus infection   | 0.3              | 0.2            | 0.02         | 0.3              | 0.4            | -0.02        |
| Hyperlipidemia                           | 62.6             | 44.3           | 0.37         | 58.3             | 59.7           | -0.03        |
| Hypertensive disorder                    | 100.0            | 100.0          | 0.00         | 100.0            | 100.0          | 0.00         |
| Lesion of liver                          | 1.4              | 0.5            | 0.09         | 1.0              | 0.9            | 0.01         |
| Obesity                                  | 10.9             | 7.0            | 0.14         | 9.8              | 10.1           | -0.01        |
| Osteoarthritis                           | 24.4             | 17.1           | 0.18         | 22.9             | 23.3           | -0.01        |
| Pneumonia                                | 7.3              | 2.4            | 0.23         | 4.6              | 4.8            | -0.01        |
| Psoriasis                                | 1.1              | 1.1            | 0.00         | 1.1              | 1.1            | 0.00         |
| Renal impairment                         | 13.3             | 2.2            | 0.42         | 7.4              | 7.6            | -0.01        |

|                                             |      |      |       |      |      |       |
|---------------------------------------------|------|------|-------|------|------|-------|
| Rheumatoid arthritis                        | 1.8  | 1.4  | 0.03  | 1.7  | 1.7  | -0.01 |
| Schizophrenia                               | 0.3  | 0.2  | 0.02  | 0.3  | 0.3  | -0.01 |
| Ulcerative colitis                          | 0.5  | 0.4  | 0.02  | 0.5  | 0.5  | 0.00  |
| Urinary tract infectious disease            | 12.2 | 8.4  | 0.12  | 10.7 | 10.8 | 0.00  |
| Viral hepatitis C                           | 0.8  | 0.5  | 0.03  | 0.7  | 0.6  | 0.01  |
| Visual system disorder                      | 31.3 | 26.2 | 0.11  | 29.8 | 30.3 | -0.01 |
| Medical history: Cardiovascular disease     |      |      |       |      |      |       |
| Atrial fibrillation                         | 12.4 | 3.6  | 0.33  | 8.4  | 8.7  | -0.01 |
| Cerebrovascular disease                     | 8.3  | 3.5  | 0.20  | 6.6  | 6.8  | -0.01 |
| Coronary arteriosclerosis                   | 37.0 | 9.8  | 0.68  | 25.3 | 26.4 | -0.02 |
| Heart disease                               | 64.5 | 25.9 | 0.84  | 51.2 | 53.7 | -0.05 |
| Heart failure                               | 19.6 | 1.7  | 0.60  | 7.8  | 7.9  | 0.00  |
| Ischemic heart disease                      | 30.0 | 7.1  | 0.62  | 18.8 | 19.5 | -0.02 |
| Peripheral vascular disease                 | 23.4 | 8.7  | 0.41  | 18.1 | 18.7 | -0.02 |
| Pulmonary embolism                          | 1.2  | 0.4  | 0.09  | 0.7  | 1.0  | -0.04 |
| Venous thrombosis                           | 3.8  | 1.7  | 0.13  | 2.7  | 2.8  | -0.01 |
| Medical history: Neoplasms                  |      |      |       |      |      |       |
| Hematologic neoplasm                        | 1.8  | 1.0  | 0.07  | 1.5  | 1.7  | -0.01 |
| Malignant lymphoma                          | 0.9  | 0.4  | 0.06  | 0.7  | 0.7  | 0.00  |
| Malignant neoplasm of anorectum             | 0.4  | 0.3  | 0.02  | 0.4  | 0.4  | 0.00  |
| Malignant neoplastic disease                | 12.4 | 7.9  | 0.15  | 10.9 | 11.1 | -0.01 |
| Malignant tumor of breast                   | 1.6  | 1.5  | 0.01  | 1.6  | 1.5  | 0.00  |
| Malignant tumor of colon                    | 0.9  | 0.5  | 0.04  | 0.7  | 0.7  | 0.00  |
| Malignant tumor of lung                     | 0.8  | 0.4  | 0.06  | 0.6  | 0.7  | -0.01 |
| Malignant tumor of urinary bladder          | 0.6  | 0.4  | 0.03  | 0.5  | 0.7  | -0.03 |
| Primary malignant neoplasm of prostate      | 2.0  | 1.2  | 0.06  | 1.7  | 1.9  | -0.01 |
| Medication use                              |      |      |       |      |      |       |
| Antibacterials for systemic use             | 44.5 | 42.1 | 0.05  | 44.0 | 44.6 | -0.01 |
| Antidepressants                             | 17.8 | 18.5 | -0.02 | 18.3 | 18.4 | 0.00  |
| Antiepileptics                              | 9.3  | 6.7  | 0.09  | 8.7  | 9.1  | -0.02 |
| Antiinflammatory and antirheumatic products | 18.6 | 19.0 | -0.01 | 19.6 | 19.9 | -0.01 |
| Antineoplastic agents                       | 2.8  | 1.8  | 0.07  | 2.4  | 2.6  | -0.01 |
| Antipsoriatics                              | 0.5  | 0.4  | 0.01  | 0.4  | 0.4  | 0.00  |
| Antithrombotic agents                       | 22.6 | 6.3  | 0.48  | 14.9 | 15.3 | -0.01 |
| Drugs for acid related disorders            | 18.3 | 14.7 | 0.10  | 17.1 | 17.4 | -0.01 |
| Drugs for obstructive airway diseases       | 17.1 | 12.5 | 0.13  | 16.1 | 16.3 | -0.01 |
| Drugs used in diabetes                      | 13.1 | 4.9  | 0.29  | 10.6 | 11.1 | -0.02 |
| Immunosuppressants                          | 1.8  | 1.4  | 0.03  | 1.7  | 1.7  | 0.00  |
| Lipid modifying agents                      | 37.6 | 22.4 | 0.34  | 32.8 | 33.7 | -0.02 |
| Opioids                                     | 20.6 | 15.0 | 0.14  | 18.5 | 18.8 | -0.01 |
| Psycholeptics                               | 21.5 | 20.2 | 0.03  | 21.0 | 21.1 | 0.00  |

|                                                          |     |     |       |     |     |      |
|----------------------------------------------------------|-----|-----|-------|-----|-----|------|
| Psychostimulants, agents used for ADHD and<br>nootropics | 1.8 | 2.4 | -0.04 | 2.1 | 2.1 | 0.00 |
| Optum, Optum ClinFormatics                               |     |     |       |     |     |      |

---



**Table S1 c. Baseline characteristics for carvedilol and atenolol new-users in the PanTher database before and after propensity score matching**

| Characteristic                           | Before matching  |                |              | After matching   |                |              |
|------------------------------------------|------------------|----------------|--------------|------------------|----------------|--------------|
|                                          | Carvedilol,<br>% | Atenolol,<br>% | Std.<br>diff | Carvedilol,<br>% | Atenolol,<br>% | Std.<br>diff |
| Age group                                |                  |                |              |                  |                |              |
| 15-19                                    | 0.1              | 0.4            | -0.05        | 0.1              | 0.2            | -0.02        |
| 20-24                                    | 0.4              | 0.8            | -0.05        | 0.5              | 0.6            | -0.01        |
| 25-29                                    | 0.8              | 1.7            | -0.08        | 1.0              | 0.9            | 0.00         |
| 30-34                                    | 1.5              | 2.8            | -0.10        | 1.7              | 1.7            | 0.00         |
| 35-39                                    | 2.6              | 4.0            | -0.08        | 2.9              | 2.8            | 0.00         |
| 40-44                                    | 4.2              | 5.9            | -0.08        | 4.7              | 4.5            | 0.01         |
| 45-49                                    | 6.3              | 8.4            | -0.08        | 6.8              | 6.7            | 0.01         |
| 50-54                                    | 9.3              | 11.5           | -0.07        | 9.9              | 9.5            | 0.02         |
| 55-59                                    | 11.7             | 12.9           | -0.04        | 11.9             | 11.7           | 0.01         |
| 60-64                                    | 12.7             | 12.5           | 0.01         | 12.8             | 12.5           | 0.01         |
| 65-69                                    | 12.7             | 11.1           | 0.05         | 12.5             | 12.6           | 0.00         |
| 70-74                                    | 11.4             | 9.1            | 0.08         | 11.0             | 11.2           | -0.01        |
| 75-79                                    | 10.6             | 8.6            | 0.07         | 10.0             | 10.2           | -0.01        |
| 80-84                                    | 11.2             | 7.9            | 0.11         | 10.4             | 10.8           | -0.01        |
| 85-89                                    | 4.4              | 2.1            | 0.13         | 3.9              | 4.0            | -0.01        |
| Gender: female                           | 47.6             | 57.0           | -0.19        | 50.9             | 50.3           | 0.01         |
| Race                                     |                  |                |              |                  |                |              |
| race = Asian                             | 1.6              | 1.8            | -0.02        | 1.5              | 1.5            | 0.00         |
| race = Black or African American         | 11.0             | 6.0            | 0.18         | 9.4              | 9.7            | -0.01        |
| race = White                             | 81.0             | 85.5           | -0.12        | 82.5             | 82.1           | 0.01         |
| Ethnicity                                |                  |                |              |                  |                |              |
| ethnicity = Hispanic or Latino           | 4.0              | 3.4            | 0.03         | 3.8              | 3.7            | 0.00         |
| Medical history: General                 |                  |                |              |                  |                |              |
| Acute respiratory disease                | 11.9             | 11.6           | 0.01         | 11.0             | 10.8           | 0.01         |
| Attention deficit hyperactivity disorder | 0.5              | 0.9            | -0.04        | 0.7              | 0.6            | 0.00         |
| Chronic liver disease                    | 1.4              | 1.3            | 0.02         | 1.3              | 1.3            | 0.00         |
| Chronic obstructive lung disease         | 9.6              | 4.2            | 0.22         | 7.2              | 7.5            | -0.01        |
| Crohn's disease                          | 0.3              | 0.4            | -0.01        | 0.4              | 0.4            | 0.00         |
| Dementia                                 | 3.3              | 1.8            | 0.09         | 2.7              | 2.7            | 0.00         |
| Depressive disorder                      | 10.5             | 11.6           | -0.03        | 10.3             | 10.3           | 0.00         |
| Diabetes mellitus                        | 24.5             | 11.6           | 0.34         | 19.7             | 20.3           | -0.02        |
| Gastroesophageal reflux disease          | 15.4             | 14.2           | 0.03         | 14.7             | 15.0           | -0.01        |
| Gastrointestinal hemorrhage              | 2.2              | 1.7            | 0.04         | 1.8              | 1.9            | 0.00         |
| Human immunodeficiency virus infection   | 0.3              | 0.2            | 0.01         | 0.2              | 0.2            | -0.01        |
| Hyperlipidemia                           | 52.4             | 43.9           | 0.17         | 48.7             | 49.2           | -0.01        |
| Hypertensive disorder                    | 95.6             | 97.3           | -0.09        | 95.2             | 94.8           | 0.02         |

|                                                |      |      |       |      |      |       |
|------------------------------------------------|------|------|-------|------|------|-------|
| Lesion of liver                                | 1.0  | 0.5  | 0.05  | 0.8  | 0.8  | 0.01  |
| Obesity                                        | 10.4 | 8.8  | 0.06  | 9.6  | 9.7  | 0.00  |
| Osteoarthritis                                 | 13.7 | 13.3 | 0.01  | 13.3 | 13.5 | 0.00  |
| Pneumonia                                      | 3.9  | 2.1  | 0.10  | 2.7  | 2.8  | -0.01 |
| Psoriasis                                      | 0.7  | 0.8  | -0.01 | 0.8  | 0.7  | 0.00  |
| Renal impairment                               | 11.6 | 3.2  | 0.32  | 6.7  | 6.8  | 0.00  |
| Rheumatoid arthritis                           | 1.5  | 1.3  | 0.02  | 1.5  | 1.4  | 0.00  |
| Schizophrenia                                  | 0.5  | 0.4  | 0.01  | 0.5  | 0.4  | 0.01  |
| Ulcerative colitis                             | 0.3  | 0.3  | -0.01 | 0.3  | 0.3  | 0.01  |
| Urinary tract infectious disease               | 6.5  | 5.3  | 0.05  | 5.6  | 5.7  | 0.00  |
| Viral hepatitis C                              | 0.8  | 0.6  | 0.02  | 0.7  | 0.7  | 0.00  |
| Visual system disorder                         | 9.0  | 10.2 | -0.04 | 8.5  | 8.3  | 0.01  |
| <b>Medical history: Cardiovascular disease</b> |      |      |       |      |      |       |
| Atrial fibrillation                            | 10.2 | 4.3  | 0.23  | 7.7  | 7.9  | -0.01 |
| Cerebrovascular disease                        | 3.6  | 2.0  | 0.10  | 2.9  | 3.1  | -0.01 |
| Coronary arteriosclerosis                      | 30.6 | 9.7  | 0.54  | 22.3 | 23.8 | -0.04 |
| Heart disease                                  | 52.7 | 22.2 | 0.67  | 40.7 | 43.0 | -0.05 |
| Heart failure                                  | 12.1 | 1.1  | 0.45  | 4.1  | 3.9  | 0.01  |
| Ischemic heart disease                         | 17.0 | 3.9  | 0.44  | 9.9  | 10.7 | -0.02 |
| Peripheral vascular disease                    | 13.1 | 6.8  | 0.21  | 10.3 | 10.6 | -0.01 |
| Pulmonary embolism                             | 0.9  | 0.5  | 0.05  | 0.7  | 0.8  | -0.01 |
| Venous thrombosis                              | 2.0  | 1.2  | 0.06  | 1.6  | 1.6  | 0.00  |
| <b>Medical history: Neoplasms</b>              |      |      |       |      |      |       |
| Hematologic neoplasm                           | 1.1  | 0.8  | 0.03  | 0.9  | 0.9  | 0.00  |
| Malignant lymphoma                             | 0.6  | 0.4  | 0.04  | 0.5  | 0.5  | 0.00  |
| Malignant neoplasm of anorectum                | 0.2  | 0.2  | 0.00  | 0.2  | 0.2  | -0.01 |
| Malignant neoplastic disease                   | 7.8  | 7.0  | 0.03  | 7.2  | 7.4  | -0.01 |
| Malignant tumor of breast                      | 1.3  | 1.4  | -0.01 | 1.3  | 1.3  | 0.00  |
| Malignant tumor of colon                       | 0.5  | 0.4  | 0.02  | 0.5  | 0.5  | 0.00  |
| Malignant tumor of lung                        | 0.5  | 0.3  | 0.03  | 0.4  | 0.4  | 0.00  |
| Malignant tumor of urinary bladder             | 0.4  | 0.3  | 0.02  | 0.4  | 0.4  | 0.00  |
| Primary malignant neoplasm of prostate         | 1.1  | 1.0  | 0.00  | 1.0  | 1.0  | -0.01 |
| <b>Medication use</b>                          |      |      |       |      |      |       |
| Agents acting on the renin-angiotensin system  | 0.0  | 0.0  | 0.02  | 0.0  | 0.0  | 0.01  |
| Antibacterials for systemic use                | 23.7 | 22.8 | 0.02  | 23.0 | 22.9 | 0.00  |
| Antidepressants                                | 21.9 | 23.9 | -0.05 | 22.5 | 22.7 | 0.00  |
| Antiepileptics                                 | 13.0 | 10.8 | 0.07  | 12.5 | 12.8 | -0.01 |
| Antiinflammatory and antirheumatic products    | 20.8 | 24.4 | -0.08 | 22.4 | 22.5 | 0.00  |
| Antineoplastic agents                          | 1.5  | 1.3  | 0.02  | 1.5  | 1.5  | 0.00  |
| Antipsoriatics                                 | 0.5  | 0.2  | 0.04  | 0.3  | 0.3  | 0.00  |
| Antithrombotic agents                          | 47.7 | 29.3 | 0.39  | 42.4 | 43.9 | -0.03 |

|                                                          |      |      |       |      |      |       |
|----------------------------------------------------------|------|------|-------|------|------|-------|
| Drugs for acid related disorders                         | 31.3 | 27.3 | 0.09  | 30.3 | 30.8 | -0.01 |
| Drugs for obstructive airway diseases                    | 23.9 | 21.0 | 0.07  | 23.2 | 23.5 | -0.01 |
| Drugs used in diabetes                                   | 18.0 | 8.4  | 0.29  | 15.0 | 15.5 | -0.02 |
| Immunosuppressants                                       | 2.3  | 1.7  | 0.04  | 2.1  | 2.1  | 0.00  |
| Lipid modifying agents                                   | 42.7 | 32.5 | 0.21  | 39.9 | 40.9 | -0.02 |
| Opioids                                                  | 25.0 | 19.7 | 0.13  | 22.6 | 23.0 | -0.01 |
| Psycholeptics                                            | 26.8 | 25.9 | 0.02  | 25.6 | 25.8 | 0.00  |
| Psychostimulants, agents used for ADHD and<br>nootropics | 1.9  | 2.7  | -0.05 | 2.2  | 2.2  | 0.00  |

---

PanTher, Optum® de-identified Electronic Health Record Dataset

**Table S1 d. Baseline characteristics for carvedilol and atenolol new-users in the CCAE database before and after propensity score stratification**

| Characteristic                           | Before stratification |                |              | After stratification |                |              |
|------------------------------------------|-----------------------|----------------|--------------|----------------------|----------------|--------------|
|                                          | Carvedilol,<br>%      | Atenolol,<br>% | Std.<br>diff | Carvedilol,<br>%     | Atenolol,<br>% | Std.<br>diff |
| Age group                                |                       |                |              |                      |                |              |
| 15-19                                    | 0.4                   | 0.9            | -0.07        | 0.9                  | 0.8            | 0.01         |
| 20-24                                    | 1.1                   | 1.7            | -0.05        | 1.4                  | 1.6            | -0.02        |
| 25-29                                    | 2.3                   | 3.0            | -0.04        | 3.0                  | 2.9            | 0.00         |
| 30-34                                    | 4.1                   | 5.3            | -0.06        | 6.6                  | 5.1            | 0.06         |
| 35-39                                    | 6.7                   | 8.1            | -0.06        | 8.0                  | 7.9            | 0.00         |
| 40-44                                    | 9.6                   | 11.7           | -0.07        | 11.6                 | 11.4           | 0.00         |
| 45-49                                    | 15.0                  | 15.7           | -0.02        | 15.0                 | 15.5           | -0.02        |
| 50-54                                    | 18.1                  | 18.0           | 0.00         | 17.1                 | 18.0           | -0.02        |
| 55-59                                    | 20.3                  | 17.9           | 0.06         | 18.4                 | 18.3           | 0.00         |
| 60-64                                    | 20.5                  | 15.9           | 0.12         | 16.3                 | 16.6           | -0.01        |
| 65-69                                    | 2.0                   | 1.5            | 0.03         | 1.6                  | 1.6            | 0.00         |
| 70-74                                    | 0.0                   | 0.0            | -0.02        | 0.0                  | 0.0            | 0.01         |
| Gender: female                           | 42.5                  | 51.2           | -0.18        | 51.3                 | 50.0           | 0.02         |
| Medical history: General                 |                       |                |              |                      |                |              |
| Acute respiratory disease                | 28.1                  | 24.6           | 0.08         | 26.5                 | 25.2           | 0.03         |
| Attention deficit hyperactivity disorder | 1.2                   | 1.1            | 0.02         | 1.0                  | 1.1            | -0.01        |
| Chronic liver disease                    | 2.1                   | 1.4            | 0.05         | 1.2                  | 1.5            | -0.02        |
| Chronic obstructive lung disease         | 5.0                   | 1.8            | 0.18         | 2.5                  | 2.2            | 0.02         |
| Crohn's disease                          | 0.5                   | 0.3            | 0.03         | 0.4                  | 0.3            | 0.00         |
| Dementia                                 | 0.3                   | 0.2            | 0.02         | 0.3                  | 0.2            | 0.01         |
| Depressive disorder                      | 9.7                   | 8.6            | 0.04         | 9.2                  | 8.8            | 0.02         |
| Diabetes mellitus                        | 16.2                  | 6.2            | 0.32         | 8.4                  | 7.8            | 0.02         |
| Gastroesophageal reflux disease          | 12.2                  | 7.9            | 0.14         | 8.4                  | 8.6            | -0.01        |
| Gastrointestinal hemorrhage              | 2.7                   | 2.1            | 0.04         | 2.4                  | 2.2            | 0.01         |
| Human immunodeficiency virus infection   | 0.3                   | 0.2            | 0.02         | 0.2                  | 0.2            | -0.01        |
| Hyperlipidemia                           | 45.9                  | 29.6           | 0.34         | 32.7                 | 32.3           | 0.01         |
| Hypertensive disorder                    | 100.0                 | 100.0          | 0.00         | 100.0                | 100.0          | 0.00         |
| Lesion of liver                          | 0.9                   | 0.3            | 0.07         | 0.4                  | 0.4            | 0.01         |
| Obesity                                  | 10.2                  | 5.7            | 0.17         | 5.9                  | 6.4            | -0.02        |
| Osteoarthritis                           | 15.6                  | 11.4           | 0.12         | 12.5                 | 12.2           | 0.01         |
| Pneumonia                                | 3.9                   | 1.6            | 0.14         | 2.1                  | 1.8            | 0.02         |
| Psoriasis                                | 1.1                   | 0.9            | 0.02         | 1.1                  | 0.9            | 0.02         |
| Renal impairment                         | 4.5                   | 0.8            | 0.23         | 1.4                  | 1.1            | 0.03         |
| Rheumatoid arthritis                     | 1.2                   | 0.9            | 0.03         | 1.2                  | 1.0            | 0.02         |
| Schizophrenia                            | 0.1                   | 0.1            | 0.00         | 0.2                  | 0.1            | 0.02         |
| Ulcerative colitis                       | 0.5                   | 0.3            | 0.02         | 0.4                  | 0.3            | 0.01         |

|                                                          |      |      |      |      |      |       |
|----------------------------------------------------------|------|------|------|------|------|-------|
| Urinary tract infectious disease                         | 7.0  | 6.3  | 0.02 | 6.7  | 6.4  | 0.01  |
| Viral hepatitis C                                        | 0.6  | 0.5  | 0.02 | 0.4  | 0.5  | -0.01 |
| Visual system disorder                                   | 16.5 | 15.0 | 0.04 | 15.8 | 15.4 | 0.01  |
| Medical history: Cardiovascular disease                  |      |      |      |      |      |       |
| Atrial fibrillation                                      | 4.1  | 1.4  | 0.16 | 1.8  | 1.8  | 0.00  |
| Cerebrovascular disease                                  | 3.8  | 1.7  | 0.13 | 2.1  | 2.0  | 0.00  |
| Coronary arteriosclerosis                                | 20.9 | 4.4  | 0.51 | 7.4  | 6.5  | 0.04  |
| Heart disease                                            | 45.0 | 16.1 | 0.66 | 21.2 | 20.4 | 0.02  |
| Heart failure                                            | 6.9  | 0.5  | 0.34 | 1.9  | 1.0  | 0.08  |
| Ischemic heart disease                                   | 18.8 | 3.8  | 0.49 | 6.5  | 5.6  | 0.04  |
| Peripheral vascular disease                              | 10.5 | 4.3  | 0.24 | 5.4  | 5.2  | 0.01  |
| Pulmonary embolism                                       | 0.8  | 0.3  | 0.08 | 0.3  | 0.4  | -0.01 |
| Venous thrombosis                                        | 2.4  | 1.1  | 0.10 | 1.3  | 1.3  | 0.00  |
| Medical history: Neoplasms                               |      |      |      |      |      |       |
| Hematologic neoplasm                                     | 1.4  | 0.6  | 0.08 | 0.7  | 0.7  | 0.00  |
| Malignant lymphoma                                       | 0.4  | 0.2  | 0.03 | 0.2  | 0.3  | 0.00  |
| Malignant neoplasm of anorectum                          | 0.3  | 0.1  | 0.03 | 0.2  | 0.1  | 0.01  |
| Malignant neoplastic disease                             | 6.6  | 4.9  | 0.07 | 4.8  | 5.2  | -0.02 |
| Malignant tumor of breast                                | 1.2  | 1.1  | 0.02 | 0.8  | 1.1  | -0.02 |
| Malignant tumor of colon                                 | 0.4  | 0.3  | 0.03 | 0.3  | 0.3  | 0.00  |
| Malignant tumor of lung                                  | 0.4  | 0.2  | 0.04 | 0.2  | 0.2  | -0.01 |
| Malignant tumor of urinary bladder                       | 0.2  | 0.1  | 0.00 | 0.1  | 0.1  | -0.03 |
| Primary malignant neoplasm of prostate                   | 0.6  | 0.5  | 0.01 | 0.5  | 0.6  | -0.01 |
| Medication use                                           |      |      |      |      |      |       |
| Antibacterials for systemic use                          | 51.1 | 48.9 | 0.04 | 50.4 | 49.4 | 0.02  |
| Antidepressants                                          | 21.5 | 21.3 | 0.00 | 21.4 | 21.4 | 0.00  |
| Antiepileptics                                           | 10.1 | 7.4  | 0.09 | 7.9  | 7.9  | 0.00  |
| Antiinflammatory and antirheumatic products              | 25.5 | 24.5 | 0.02 | 26.1 | 24.7 | 0.03  |
| Antineoplastic agents                                    | 2.2  | 1.6  | 0.05 | 1.9  | 1.7  | 0.01  |
| Antipsoriatics                                           | 0.5  | 0.4  | 0.01 | 0.5  | 0.4  | 0.01  |
| Antithrombotic agents                                    | 18.2 | 4.5  | 0.44 | 7.1  | 6.1  | 0.04  |
| Drugs for acid related disorders                         | 20.0 | 16.7 | 0.09 | 17.1 | 17.3 | 0.00  |
| Drugs for obstructive airway diseases                    | 18.9 | 16.1 | 0.07 | 16.7 | 16.6 | 0.00  |
| Drugs used in diabetes                                   | 10.6 | 3.7  | 0.27 | 5.4  | 4.7  | 0.03  |
| Immunosuppressants                                       | 2.2  | 1.5  | 0.05 | 1.9  | 1.6  | 0.02  |
| Lipid modifying agents                                   | 33.7 | 18.7 | 0.34 | 20.8 | 20.9 | 0.00  |
| Opioids                                                  | 23.9 | 16.6 | 0.18 | 19.2 | 17.7 | 0.04  |
| Psycholeptics                                            | 27.2 | 23.9 | 0.08 | 25.8 | 24.5 | 0.03  |
| Psychostimulants, agents used for ADHD and<br>nootropics | 3.6  | 3.5  | 0.00 | 3.8  | 3.6  | 0.01  |

CCAE, Truven MarketScan Commercial Claims and Encounters

**Table S1 e. Baseline characteristics for carvedilol and atenolol new-users in the Optum database before and after propensity score stratification**

| Characteristic                           | Before stratification |                |              | After stratification |                |              |
|------------------------------------------|-----------------------|----------------|--------------|----------------------|----------------|--------------|
|                                          | Carvedilol,<br>%      | Atenolol,<br>% | Std.<br>diff | Carvedilol,<br>%     | Atenolol,<br>% | Std.<br>diff |
| Age group                                |                       |                |              |                      |                |              |
| 15-19                                    | 0.2                   | 0.5            | -0.05        | 0.5                  | 0.4            | 0.00         |
| 20-24                                    | 0.4                   | 0.9            | -0.07        | 0.7                  | 0.9            | -0.02        |
| 25-29                                    | 1.2                   | 2.3            | -0.09        | 2.4                  | 2.1            | 0.02         |
| 30-34                                    | 2.0                   | 4.1            | -0.12        | 3.2                  | 3.7            | -0.03        |
| 35-39                                    | 3.5                   | 6.5            | -0.14        | 5.7                  | 6.1            | -0.02        |
| 40-44                                    | 5.7                   | 9.2            | -0.14        | 9.1                  | 8.6            | 0.02         |
| 45-49                                    | 8.0                   | 12.2           | -0.14        | 13.3                 | 11.5           | 0.06         |
| 50-54                                    | 10.6                  | 13.4           | -0.08        | 13.1                 | 12.9           | 0.00         |
| 55-59                                    | 11.4                  | 13.0           | -0.05        | 13.4                 | 12.6           | 0.02         |
| 60-64                                    | 12.0                  | 10.5           | 0.05         | 10.7                 | 10.8           | 0.00         |
| 65-69                                    | 12.6                  | 8.6            | 0.13         | 8.8                  | 9.3            | -0.02        |
| 70-74                                    | 11.5                  | 7.6            | 0.13         | 7.5                  | 8.2            | -0.03        |
| 75-79                                    | 9.5                   | 6.3            | 0.12         | 6.3                  | 6.9            | -0.02        |
| 80-84                                    | 7.5                   | 3.6            | 0.17         | 3.8                  | 4.4            | -0.03        |
| 85-89                                    | 4.0                   | 1.2            | 0.18         | 1.5                  | 1.6            | -0.01        |
| Gender: female                           | 40.0                  | 51.6           | -0.24        | 50.8                 | 49.8           | 0.02         |
| Medical history: General                 |                       |                |              |                      |                |              |
| Acute respiratory disease                | 28.6                  | 24.7           | 0.09         | 25.6                 | 25.2           | 0.01         |
| Attention deficit hyperactivity disorder | 0.9                   | 0.9            | 0.00         | 0.9                  | 0.9            | 0.00         |
| Chronic liver disease                    | 2.2                   | 1.5            | 0.05         | 1.5                  | 1.7            | -0.01        |
| Chronic obstructive lung disease         | 13.6                  | 4.3            | 0.33         | 6.1                  | 5.6            | 0.02         |
| Crohn's disease                          | 0.5                   | 0.4            | 0.01         | 0.3                  | 0.4            | -0.02        |
| Dementia                                 | 3.3                   | 1.2            | 0.15         | 1.2                  | 1.5            | -0.02        |
| Depressive disorder                      | 12.1                  | 10.6           | 0.05         | 10.2                 | 10.9           | -0.02        |
| Diabetes mellitus                        | 26.5                  | 10.2           | 0.43         | 13.2                 | 12.9           | 0.01         |
| Gastroesophageal reflux disease          | 17.5                  | 11.7           | 0.16         | 12.6                 | 12.8           | -0.01        |
| Gastrointestinal hemorrhage              | 4.1                   | 3.0            | 0.06         | 2.9                  | 3.2            | -0.01        |
| Human immunodeficiency virus infection   | 0.3                   | 0.2            | 0.02         | 0.2                  | 0.3            | -0.01        |
| Hyperlipidemia                           | 62.6                  | 44.3           | 0.37         | 49.5                 | 47.6           | 0.04         |
| Hypertensive disorder                    | 100.0                 | 100.0          | 0.00         | 100.0                | 100.0          | 0.00         |
| Lesion of liver                          | 1.4                   | 0.5            | 0.09         | 0.7                  | 0.6            | 0.01         |
| Obesity                                  | 10.9                  | 7.0            | 0.14         | 7.5                  | 7.7            | -0.01        |
| Osteoarthritis                           | 24.4                  | 17.1           | 0.18         | 18.9                 | 18.5           | 0.01         |
| Pneumonia                                | 7.3                   | 2.4            | 0.23         | 3.7                  | 3.1            | 0.04         |
| Psoriasis                                | 1.1                   | 1.1            | 0.00         | 0.9                  | 1.1            | -0.01        |
| Renal impairment                         | 13.3                  | 2.2            | 0.42         | 4.2                  | 3.6            | 0.03         |

|                                             |      |      |       |      |      |       |
|---------------------------------------------|------|------|-------|------|------|-------|
| Rheumatoid arthritis                        | 1.8  | 1.4  | 0.03  | 1.2  | 1.4  | -0.02 |
| Schizophrenia                               | 0.3  | 0.2  | 0.02  | 0.2  | 0.2  | 0.00  |
| Ulcerative colitis                          | 0.5  | 0.4  | 0.02  | 0.5  | 0.4  | 0.01  |
| Urinary tract infectious disease            | 12.2 | 8.4  | 0.12  | 10.1 | 9.0  | 0.04  |
| Viral hepatitis C                           | 0.8  | 0.5  | 0.03  | 0.5  | 0.5  | 0.00  |
| Visual system disorder                      | 31.3 | 26.2 | 0.11  | 25.7 | 27.2 | -0.03 |
| Medical history: Cardiovascular disease     |      |      |       |      |      |       |
| Atrial fibrillation                         | 12.4 | 3.6  | 0.33  | 4.7  | 4.9  | -0.01 |
| Cerebrovascular disease                     | 8.3  | 3.5  | 0.20  | 4.0  | 4.3  | -0.02 |
| Coronary arteriosclerosis                   | 37.0 | 9.8  | 0.68  | 13.7 | 13.9 | -0.01 |
| Heart disease                               | 64.5 | 25.9 | 0.84  | 31.0 | 32.3 | -0.03 |
| Heart failure                               | 19.6 | 1.7  | 0.60  | 5.3  | 3.6  | 0.08  |
| Ischemic heart disease                      | 30.0 | 7.1  | 0.62  | 11.1 | 10.3 | 0.03  |
| Peripheral vascular disease                 | 23.4 | 8.7  | 0.41  | 10.7 | 11.1 | -0.01 |
| Pulmonary embolism                          | 1.2  | 0.4  | 0.09  | 0.6  | 0.5  | 0.01  |
| Venous thrombosis                           | 3.8  | 1.7  | 0.13  | 2.0  | 2.0  | 0.00  |
| Medical history: Neoplasms                  |      |      |       |      |      |       |
| Hematologic neoplasm                        | 1.8  | 1.0  | 0.07  | 1.1  | 1.2  | -0.01 |
| Malignant lymphoma                          | 0.9  | 0.4  | 0.06  | 0.5  | 0.4  | 0.00  |
| Malignant neoplasm of anorectum             | 0.4  | 0.3  | 0.02  | 0.2  | 0.3  | -0.01 |
| Malignant neoplastic disease                | 12.4 | 7.9  | 0.15  | 8.5  | 8.6  | 0.00  |
| Malignant tumor of breast                   | 1.6  | 1.5  | 0.01  | 1.6  | 1.5  | 0.00  |
| Malignant tumor of colon                    | 0.9  | 0.5  | 0.04  | 0.5  | 0.6  | -0.01 |
| Malignant tumor of lung                     | 0.8  | 0.4  | 0.06  | 0.4  | 0.5  | -0.01 |
| Malignant tumor of urinary bladder          | 0.6  | 0.4  | 0.03  | 0.3  | 0.4  | -0.02 |
| Primary malignant neoplasm of prostate      | 2.0  | 1.2  | 0.06  | 1.3  | 1.4  | -0.01 |
| Medication use                              |      |      |       |      |      |       |
| Antibacterials for systemic use             | 44.5 | 42.1 | 0.05  | 42.3 | 42.7 | -0.01 |
| Antidepressants                             | 17.8 | 18.5 | -0.02 | 18.6 | 18.4 | 0.00  |
| Antiepileptics                              | 9.3  | 6.7  | 0.09  | 7.5  | 7.2  | 0.01  |
| Antiinflammatory and antirheumatic products | 18.6 | 19.0 | -0.01 | 19.3 | 19.2 | 0.00  |
| Antineoplastic agents                       | 2.8  | 1.8  | 0.07  | 1.7  | 2.0  | -0.02 |
| Antipsoriatics                              | 0.5  | 0.4  | 0.01  | 0.5  | 0.4  | 0.01  |
| Antithrombotic agents                       | 22.6 | 6.3  | 0.48  | 8.5  | 8.6  | 0.00  |
| Drugs for acid related disorders            | 18.3 | 14.7 | 0.10  | 14.3 | 15.4 | -0.03 |
| Drugs for obstructive airway diseases       | 17.1 | 12.5 | 0.13  | 14.2 | 13.3 | 0.03  |
| Drugs used in diabetes                      | 13.1 | 4.9  | 0.29  | 6.7  | 6.3  | 0.01  |
| Immunosuppressants                          | 1.8  | 1.4  | 0.03  | 1.3  | 1.4  | -0.02 |
| Lipid modifying agents                      | 37.6 | 22.4 | 0.34  | 24.7 | 25.0 | 0.00  |
| Opioids                                     | 20.6 | 15.0 | 0.14  | 16.0 | 16.0 | 0.00  |
| Psycholeptics                               | 21.5 | 20.2 | 0.03  | 21.4 | 20.4 | 0.02  |

|                                                          |     |     |       |     |     |      |
|----------------------------------------------------------|-----|-----|-------|-----|-----|------|
| Psychostimulants, agents used for ADHD and<br>nootropics | 1.8 | 2.4 | -0.04 | 2.5 | 2.3 | 0.01 |
| Optum, Optum ClinFormatics                               |     |     |       |     |     |      |

---



**Table S1 f. Baseline characteristics for carvedilol and atenolol new-users in the PanTher database before and after propensity score stratification**

| Characteristic                           | Before stratification |                |              | After stratification |                |              |
|------------------------------------------|-----------------------|----------------|--------------|----------------------|----------------|--------------|
|                                          | Carvedilol,<br>%      | Atenolol,<br>% | Std.<br>diff | Carvedilol,<br>%     | Atenolol,<br>% | Std.<br>diff |
| Age group                                |                       |                |              |                      |                |              |
| 15-19                                    | 0.1                   | 0.4            | -0.05        | 0.4                  | 0.3            | 0.01         |
| 20-24                                    | 0.4                   | 0.8            | -0.05        | 0.8                  | 0.7            | 0.01         |
| 25-29                                    | 0.8                   | 1.7            | -0.08        | 1.5                  | 1.5            | 0.00         |
| 30-34                                    | 1.5                   | 2.8            | -0.10        | 2.8                  | 2.5            | 0.02         |
| 35-39                                    | 2.6                   | 4.0            | -0.08        | 3.8                  | 3.7            | 0.01         |
| 40-44                                    | 4.2                   | 5.9            | -0.08        | 5.6                  | 5.3            | 0.01         |
| 45-49                                    | 6.3                   | 8.4            | -0.08        | 7.9                  | 7.9            | 0.00         |
| 50-54                                    | 9.3                   | 11.5           | -0.07        | 11.0                 | 10.9           | 0.00         |
| 55-59                                    | 11.7                  | 12.9           | -0.04        | 12.2                 | 12.5           | -0.01        |
| 60-64                                    | 12.7                  | 12.5           | 0.01         | 12.3                 | 12.5           | -0.01        |
| 65-69                                    | 12.7                  | 11.1           | 0.05         | 11.8                 | 11.6           | 0.01         |
| 70-74                                    | 11.4                  | 9.1            | 0.08         | 9.9                  | 9.7            | 0.00         |
| 75-79                                    | 10.6                  | 8.6            | 0.07         | 8.9                  | 9.2            | -0.01        |
| 80-84                                    | 11.2                  | 7.9            | 0.11         | 8.4                  | 8.9            | -0.02        |
| 85-89                                    | 4.4                   | 2.1            | 0.13         | 2.7                  | 2.8            | 0.00         |
| Gender: female                           | 47.6                  | 57.0           | -0.19        | 56.5                 | 54.8           | 0.04         |
| Race                                     |                       |                |              |                      |                |              |
| race = Asian                             | 1.6                   | 1.8            | -0.02        | 1.7                  | 1.7            | 0.00         |
| race = Black or African American         | 11.0                  | 6.0            | 0.18         | 6.9                  | 7.0            | -0.01        |
| race = White                             | 81.0                  | 85.5           | -0.12        | 85.1                 | 84.6           | 0.02         |
| Ethnicity                                |                       |                |              |                      |                |              |
| ethnicity = Hispanic or Latino           | 4.0                   | 3.4            | 0.03         | 3.4                  | 3.5            | -0.01        |
| Medical history: General                 |                       |                |              |                      |                |              |
| Acute respiratory disease                | 11.9                  | 11.6           | 0.01         | 11.8                 | 11.5           | 0.01         |
| Attention deficit hyperactivity disorder | 0.5                   | 0.9            | -0.04        | 0.9                  | 0.8            | 0.01         |
| Chronic liver disease                    | 1.4                   | 1.3            | 0.02         | 1.4                  | 1.3            | 0.01         |
| Chronic obstructive lung disease         | 9.6                   | 4.2            | 0.22         | 5.7                  | 5.5            | 0.01         |
| Crohn's disease                          | 0.3                   | 0.4            | -0.01        | 0.4                  | 0.4            | 0.00         |
| Dementia                                 | 3.3                   | 1.8            | 0.09         | 2.1                  | 2.1            | 0.00         |
| Depressive disorder                      | 10.5                  | 11.6           | -0.03        | 11.8                 | 11.3           | 0.02         |
| Diabetes mellitus                        | 24.5                  | 11.6           | 0.34         | 14.8                 | 14.7           | 0.00         |
| Gastroesophageal reflux disease          | 15.4                  | 14.2           | 0.03         | 15.0                 | 14.6           | 0.01         |
| Gastrointestinal hemorrhage              | 2.2                   | 1.7            | 0.04         | 2.0                  | 1.8            | 0.02         |
| Human immunodeficiency virus infection   | 0.3                   | 0.2            | 0.01         | 0.2                  | 0.2            | -0.01        |
| Hyperlipidemia                           | 52.4                  | 43.9           | 0.17         | 45.4                 | 46.1           | -0.01        |
| Hypertensive disorder                    | 95.6                  | 97.3           | -0.09        | 97.4                 | 96.8           | 0.04         |

|                                                |      |      |       |      |      |       |
|------------------------------------------------|------|------|-------|------|------|-------|
| Lesion of liver                                | 1.0  | 0.5  | 0.05  | 0.7  | 0.6  | 0.00  |
| Obesity                                        | 10.4 | 8.8  | 0.06  | 9.8  | 9.1  | 0.02  |
| Osteoarthritis                                 | 13.7 | 13.3 | 0.01  | 13.8 | 13.5 | 0.01  |
| Pneumonia                                      | 3.9  | 2.1  | 0.10  | 2.6  | 2.5  | 0.01  |
| Psoriasis                                      | 0.7  | 0.8  | -0.01 | 1.0  | 0.8  | 0.02  |
| Renal impairment                               | 11.6 | 3.2  | 0.32  | 5.4  | 4.8  | 0.03  |
| Rheumatoid arthritis                           | 1.5  | 1.3  | 0.02  | 1.3  | 1.3  | 0.00  |
| Schizophrenia                                  | 0.5  | 0.4  | 0.01  | 0.4  | 0.4  | 0.00  |
| Ulcerative colitis                             | 0.3  | 0.3  | -0.01 | 0.3  | 0.3  | 0.00  |
| Urinary tract infectious disease               | 6.5  | 5.3  | 0.05  | 5.6  | 5.5  | 0.01  |
| Viral hepatitis C                              | 0.8  | 0.6  | 0.02  | 0.7  | 0.7  | 0.00  |
| Visual system disorder                         | 9.0  | 10.2 | -0.04 | 9.5  | 9.8  | -0.01 |
| <b>Medical history: Cardiovascular disease</b> |      |      |       |      |      |       |
| Atrial fibrillation                            | 10.2 | 4.3  | 0.23  | 5.7  | 5.6  | 0.00  |
| Cerebrovascular disease                        | 3.6  | 2.0  | 0.10  | 2.4  | 2.4  | 0.00  |
| Coronary arteriosclerosis                      | 30.6 | 9.7  | 0.54  | 14.7 | 15.0 | -0.01 |
| Heart disease                                  | 52.7 | 22.2 | 0.67  | 29.4 | 29.7 | 0.00  |
| Heart failure                                  | 12.1 | 1.1  | 0.45  | 4.1  | 2.7  | 0.08  |
| Ischemic heart disease                         | 17.0 | 3.9  | 0.44  | 7.3  | 6.8  | 0.02  |
| Peripheral vascular disease                    | 13.1 | 6.8  | 0.21  | 8.5  | 8.3  | 0.01  |
| Pulmonary embolism                             | 0.9  | 0.5  | 0.05  | 0.6  | 0.6  | 0.00  |
| Venous thrombosis                              | 2.0  | 1.2  | 0.06  | 1.3  | 1.3  | 0.00  |
| <b>Medical history: Neoplasms</b>              |      |      |       |      |      |       |
| Hematologic neoplasm                           | 1.1  | 0.8  | 0.03  | 0.9  | 0.8  | 0.00  |
| Malignant lymphoma                             | 0.6  | 0.4  | 0.04  | 0.5  | 0.4  | 0.01  |
| Malignant neoplasm of anorectum                | 0.2  | 0.2  | 0.00  | 0.2  | 0.2  | 0.00  |
| Malignant neoplastic disease                   | 7.8  | 7.0  | 0.03  | 7.5  | 7.2  | 0.01  |
| Malignant tumor of breast                      | 1.3  | 1.4  | -0.01 | 1.5  | 1.4  | 0.01  |
| Malignant tumor of colon                       | 0.5  | 0.4  | 0.02  | 0.4  | 0.4  | 0.00  |
| Malignant tumor of lung                        | 0.5  | 0.3  | 0.03  | 0.4  | 0.4  | 0.00  |
| Malignant tumor of urinary bladder             | 0.4  | 0.3  | 0.02  | 0.4  | 0.3  | 0.01  |
| Primary malignant neoplasm of prostate         | 1.1  | 1.0  | 0.00  | 1.1  | 1.0  | 0.00  |
| <b>Medication use</b>                          |      |      |       |      |      |       |
| Agents acting on the renin-angiotensin system  | 0.0  | 0.0  | 0.02  | 0.0  | 0.0  | 0.01  |
| Antibacterials for systemic use                | 23.7 | 22.8 | 0.02  | 23.3 | 23.0 | 0.01  |
| Antidepressants                                | 21.9 | 23.9 | -0.05 | 24.6 | 23.7 | 0.02  |
| Antiepileptics                                 | 13.0 | 10.8 | 0.07  | 11.8 | 11.5 | 0.01  |
| Antiinflammatory and antirheumatic products    | 20.8 | 24.4 | -0.08 | 24.5 | 23.8 | 0.02  |
| Antineoplastic agents                          | 1.5  | 1.3  | 0.02  | 1.5  | 1.4  | 0.01  |
| Antipsoriatics                                 | 0.5  | 0.2  | 0.04  | 0.3  | 0.3  | 0.00  |
| Antithrombotic agents                          | 47.7 | 29.3 | 0.39  | 34.0 | 34.4 | -0.01 |

|                                                          |      |      |       |      |      |       |
|----------------------------------------------------------|------|------|-------|------|------|-------|
| Drugs for acid related disorders                         | 31.3 | 27.3 | 0.09  | 28.8 | 28.7 | 0.00  |
| Drugs for obstructive airway diseases                    | 23.9 | 21.0 | 0.07  | 22.1 | 22.1 | 0.00  |
| Drugs used in diabetes                                   | 18.0 | 8.4  | 0.29  | 11.1 | 11.0 | 0.00  |
| Immunosuppressants                                       | 2.3  | 1.7  | 0.04  | 1.8  | 1.9  | 0.00  |
| Lipid modifying agents                                   | 42.7 | 32.5 | 0.21  | 34.6 | 35.4 | -0.02 |
| Opioids                                                  | 25.0 | 19.7 | 0.13  | 21.5 | 21.0 | 0.01  |
| Psycholeptics                                            | 26.8 | 25.9 | 0.02  | 27.6 | 26.1 | 0.03  |
| Psychostimulants, agents used for ADHD and<br>nootropics | 1.9  | 2.7  | -0.05 | 2.8  | 2.5  | 0.02  |

---

PanTher, Optum® de-identified Electronic Health Record Dataset

## Table S2. Baseline characteristics between nebivolol and atenolol

Table S2 a. Baseline characteristics for nebivolol and atenolol new-users in the CCAE database before and after propensity score matching

| Characteristic                           | Before matching |                |              | After matching  |                |              |
|------------------------------------------|-----------------|----------------|--------------|-----------------|----------------|--------------|
|                                          | Nebivolol,<br>% | Atenolol,<br>% | Std.<br>diff | Nebivolol,<br>% | Atenolol,<br>% | Std.<br>diff |
| Age group                                |                 |                |              |                 |                |              |
| 15-19                                    | 0.4             | 1.1            | -0.09        | 0.4             | 0.5            | 0.00         |
| 20-24                                    | 1.6             | 2.1            | -0.04        | 1.7             | 1.7            | 0.00         |
| 25-29                                    | 3.3             | 3.6            | -0.02        | 3.4             | 3.3            | 0.01         |
| 30-34                                    | 6.1             | 6.1            | 0.00         | 6.2             | 6.1            | 0.00         |
| 35-39                                    | 9.9             | 8.8            | 0.04         | 9.8             | 9.8            | 0.00         |
| 40-44                                    | 13.8            | 12.0           | 0.05         | 13.2            | 13.4           | 0.00         |
| 45-49                                    | 16.8            | 15.2           | 0.04         | 16.4            | 16.2           | 0.00         |
| 50-54                                    | 18.5            | 17.3           | 0.03         | 18.2            | 18.4           | -0.01        |
| 55-59                                    | 16.2            | 16.9           | -0.02        | 16.4            | 16.4           | 0.00         |
| 60-64                                    | 12.4            | 15.1           | -0.08        | 13.2            | 12.9           | 0.01         |
| 65-69                                    | 1.0             | 1.4            | -0.04        | 1.0             | 1.1            | -0.01        |
| Gender: female                           | 45.7            | 52.6           | -0.14        | 47.7            | 47.0           | 0.01         |
| Medical history: General                 |                 |                |              |                 |                |              |
| Acute respiratory disease                | 29.2            | 27.1           | 0.05         | 28.1            | 28.5           | -0.01        |
| Attention deficit hyperactivity disorder | 2.0             | 1.7            | 0.02         | 1.9             | 1.9            | -0.01        |
| Chronic liver disease                    | 1.7             | 1.7            | 0.00         | 1.7             | 1.6            | 0.00         |
| Chronic obstructive lung disease         | 1.9             | 1.9            | 0.00         | 1.8             | 1.9            | 0.00         |
| Crohn's disease                          | 0.4             | 0.4            | 0.00         | 0.4             | 0.3            | 0.00         |
| Dementia                                 | 0.1             | 0.2            | -0.02        | 0.1             | 0.1            | 0.00         |
| Depressive disorder                      | 9.2             | 10.6           | -0.05        | 9.2             | 9.4            | 0.00         |
| Diabetes mellitus                        | 6.3             | 6.9            | -0.02        | 6.4             | 6.4            | 0.00         |
| Gastroesophageal reflux disease          | 10.5            | 9.9            | 0.02         | 10.0            | 10.1           | 0.00         |
| Gastrointestinal hemorrhage              | 1.8             | 1.9            | -0.01        | 1.7             | 1.8            | -0.01        |
| Human immunodeficiency virus infection   | 0.2             | 0.2            | 0.00         | 0.2             | 0.3            | -0.01        |
| Hyperlipidemia                           | 37.5            | 32.9           | 0.10         | 35.4            | 36.1           | -0.02        |
| Hypertensive disorder                    | 100.0           | 100.0          | 0.00         | 100.0           | 100.0          | 0.00         |
| Lesion of liver                          | 0.3             | 0.4            | -0.01        | 0.3             | 0.3            | 0.00         |
| Obesity                                  | 8.2             | 8.3            | 0.00         | 8.1             | 8.3            | -0.01        |
| Osteoarthritis                           | 13.4            | 13.3           | 0.00         | 13.1            | 13.4           | -0.01        |
| Pneumonia                                | 1.5             | 1.6            | -0.01        | 1.4             | 1.5            | 0.00         |
| Psoriasis                                | 1.0             | 1.0            | 0.00         | 1.0             | 1.0            | 0.00         |
| Renal impairment                         | 1.0             | 1.0            | 0.00         | 1.0             | 0.9            | 0.01         |
| Rheumatoid arthritis                     | 1.0             | 1.0            | -0.01        | 1.0             | 1.0            | 0.00         |
| Schizophrenia                            | 0.0             | 0.1            | -0.03        | 0.0             | 0.1            | -0.02        |
| Ulcerative colitis                       | 0.3             | 0.4            | -0.01        | 0.3             | 0.3            | 0.00         |

|                                                          |      |      |       |      |      |       |
|----------------------------------------------------------|------|------|-------|------|------|-------|
| Urinary tract infectious disease                         | 6.4  | 6.8  | -0.02 | 6.4  | 6.3  | 0.00  |
| Viral hepatitis C                                        | 0.3  | 0.5  | -0.02 | 0.4  | 0.4  | 0.00  |
| Visual system disorder                                   | 15.8 | 16.0 | 0.00  | 15.4 | 15.7 | -0.01 |
| Medical history: Cardiovascular disease                  |      |      |       |      |      |       |
| Atrial fibrillation                                      | 1.1  | 1.7  | -0.04 | 1.2  | 1.3  | -0.01 |
| Cerebrovascular disease                                  | 1.7  | 1.8  | -0.01 | 1.7  | 1.6  | 0.00  |
| Coronary arteriosclerosis                                | 4.3  | 3.9  | 0.02  | 4.0  | 4.1  | -0.01 |
| Heart disease                                            | 19.1 | 16.7 | 0.06  | 16.8 | 17.4 | -0.02 |
| Heart failure                                            | 0.8  | 0.6  | 0.02  | 0.6  | 0.6  | 0.00  |
| Ischemic heart disease                                   | 3.5  | 3.3  | 0.01  | 3.2  | 3.3  | -0.01 |
| Peripheral vascular disease                              | 5.6  | 4.8  | 0.04  | 5.1  | 5.1  | 0.00  |
| Pulmonary embolism                                       | 0.3  | 0.3  | -0.01 | 0.3  | 0.3  | 0.00  |
| Venous thrombosis                                        | 1.1  | 1.2  | 0.00  | 1.1  | 1.1  | 0.00  |
| Medical history: Neoplasms                               |      |      |       |      |      |       |
| Hematologic neoplasm                                     | 0.7  | 0.7  | 0.00  | 0.7  | 0.6  | 0.01  |
| Malignant lymphoma                                       | 0.3  | 0.3  | 0.00  | 0.3  | 0.2  | 0.00  |
| Malignant neoplasm of anorectum                          | 0.1  | 0.1  | 0.00  | 0.1  | 0.1  | 0.01  |
| Malignant neoplastic disease                             | 4.8  | 4.8  | 0.00  | 4.7  | 4.8  | -0.01 |
| Malignant tumor of breast                                | 1.0  | 1.0  | 0.00  | 1.0  | 1.0  | 0.00  |
| Malignant tumor of colon                                 | 0.2  | 0.2  | -0.01 | 0.2  | 0.2  | 0.00  |
| Malignant tumor of lung                                  | 0.1  | 0.2  | -0.01 | 0.1  | 0.2  | -0.01 |
| Malignant tumor of urinary bladder                       | 0.1  | 0.1  | 0.00  | 0.1  | 0.1  | 0.00  |
| Primary malignant neoplasm of prostate                   | 0.5  | 0.5  | 0.01  | 0.5  | 0.6  | -0.01 |
| Medication use                                           |      |      |       |      |      |       |
| Antibacterials for systemic use                          | 54.6 | 50.9 | 0.07  | 52.9 | 53.4 | -0.01 |
| Antidepressants                                          | 22.5 | 23.4 | -0.02 | 22.2 | 22.2 | 0.00  |
| Antiepileptics                                           | 9.0  | 9.0  | 0.00  | 8.9  | 8.8  | 0.00  |
| Antiinflammatory and antirheumatic products              | 26.2 | 26.0 | 0.00  | 25.5 | 25.7 | 0.00  |
| Antineoplastic agents                                    | 1.7  | 1.7  | 0.00  | 1.7  | 1.7  | 0.00  |
| Antipsoriatics                                           | 0.4  | 0.4  | 0.00  | 0.4  | 0.4  | 0.00  |
| Antithrombotic agents                                    | 4.3  | 4.7  | -0.02 | 4.2  | 4.3  | -0.01 |
| Drugs for acid related disorders                         | 16.7 | 16.5 | 0.00  | 15.9 | 16.1 | -0.01 |
| Drugs for obstructive airway diseases                    | 19.8 | 18.6 | 0.03  | 18.7 | 19.0 | -0.01 |
| Drugs used in diabetes                                   | 3.6  | 4.0  | -0.02 | 3.7  | 3.7  | 0.00  |
| Immunosuppressants                                       | 1.9  | 1.8  | 0.01  | 1.8  | 1.8  | 0.00  |
| Lipid modifying agents                                   | 20.8 | 18.7 | 0.05  | 19.1 | 19.4 | -0.01 |
| Opioids                                                  | 18.8 | 19.2 | -0.01 | 18.5 | 18.6 | 0.00  |
| Psycholeptics                                            | 26.7 | 27.1 | -0.01 | 26.2 | 26.3 | 0.00  |
| Psychostimulants, agents used for ADHD and<br>nootropics | 5.4  | 4.6  | 0.04  | 5.0  | 5.1  | 0.00  |

CCAE, Truven MarketScan Commercial Claims and Encounters

**Table S2 b. Baseline characteristics for nebivolol and atenolol new-users in the Optum database before and after propensity score matching**

| Characteristic                           | Before matching |                |              | After matching  |                |              |
|------------------------------------------|-----------------|----------------|--------------|-----------------|----------------|--------------|
|                                          | Nebivolol,<br>% | Atenolol,<br>% | Std.<br>diff | Nebivolol,<br>% | Atenolol,<br>% | Std.<br>diff |
| Age group                                |                 |                |              |                 |                |              |
| 15-19                                    | 0.3             | 0.6            | -0.05        | 0.3             | 0.5            | -0.02        |
| 20-24                                    | 1.3             | 1.1            | 0.02         | 1.3             | 1.2            | 0.01         |
| 25-29                                    | 3.1             | 2.6            | 0.03         | 3.3             | 3.2            | 0.00         |
| 30-34                                    | 5.8             | 4.0            | 0.08         | 5.8             | 5.9            | 0.00         |
| 35-39                                    | 9.0             | 6.1            | 0.11         | 8.6             | 8.7            | 0.00         |
| 40-44                                    | 12.4            | 7.6            | 0.16         | 11.2            | 11.7           | -0.01        |
| 45-49                                    | 14.2            | 10.3           | 0.12         | 13.3            | 13.7           | -0.01        |
| 50-54                                    | 15.6            | 11.4           | 0.12         | 14.9            | 15.1           | 0.00         |
| 55-59                                    | 13.0            | 11.8           | 0.04         | 13.0            | 13.2           | 0.00         |
| 60-64                                    | 9.4             | 10.0           | -0.02        | 9.9             | 9.9            | 0.00         |
| 65-69                                    | 6.6             | 11.6           | -0.17        | 7.4             | 6.9            | 0.02         |
| 70-74                                    | 4.3             | 9.1            | -0.19        | 5.0             | 4.6            | 0.02         |
| 75-79                                    | 2.4             | 6.5            | -0.20        | 2.8             | 2.6            | 0.02         |
| 80-84                                    | 1.8             | 5.3            | -0.18        | 2.2             | 2.0            | 0.01         |
| 85-89                                    | 0.7             | 1.9            | -0.11        | 0.8             | 0.9            | 0.00         |
| Gender: female                           | 44.1            | 53.6           | -0.19        | 46.5            | 45.9           | 0.01         |
| Medical history: General                 |                 |                |              |                 |                |              |
| Acute respiratory disease                | 29.5            | 25.9           | 0.08         | 28.0            | 29.1           | -0.02        |
| Attention deficit hyperactivity disorder | 2.4             | 1.3            | 0.08         | 2.1             | 2.2            | -0.01        |
| Chronic liver disease                    | 2.1             | 1.7            | 0.03         | 1.9             | 1.9            | 0.00         |
| Chronic obstructive lung disease         | 4.1             | 5.3            | -0.05        | 4.2             | 4.1            | 0.01         |
| Crohn's disease                          | 0.4             | 0.4            | 0.00         | 0.5             | 0.4            | 0.01         |
| Dementia                                 | 0.5             | 1.5            | -0.10        | 0.6             | 0.6            | 0.00         |
| Depressive disorder                      | 11.2            | 12.5           | -0.04        | 11.0            | 11.2           | -0.01        |
| Diabetes mellitus                        | 9.3             | 11.6           | -0.07        | 9.3             | 9.2            | 0.00         |
| Gastroesophageal reflux disease          | 13.5            | 14.2           | -0.02        | 13.0            | 13.4           | -0.01        |
| Gastrointestinal hemorrhage              | 2.4             | 2.7            | -0.02        | 2.2             | 2.3            | 0.00         |
| Human immunodeficiency virus infection   | 0.4             | 0.3            | 0.01         | 0.3             | 0.4            | -0.02        |
| Hyperlipidemia                           | 47.2            | 47.4           | 0.00         | 45.1            | 45.1           | 0.00         |
| Hypertensive disorder                    | 100.0           | 100.0          | 0.00         | 100.0           | 100.0          | 0.00         |
| Lesion of liver                          | 0.4             | 0.6            | -0.03        | 0.4             | 0.4            | 0.01         |
| Obesity                                  | 10.5            | 9.0            | 0.05         | 9.9             | 10.4           | -0.02        |
| Osteoarthritis                           | 17.6            | 20.0           | -0.06        | 17.7            | 17.8           | 0.00         |
| Pneumonia                                | 2.0             | 2.6            | -0.04        | 2.0             | 2.0            | 0.00         |
| Psoriasis                                | 1.4             | 1.2            | 0.02         | 1.4             | 1.3            | 0.01         |
| Renal impairment                         | 2.2             | 3.7            | -0.09        | 2.3             | 2.2            | 0.01         |

|                                             |      |      |       |      |      |       |
|---------------------------------------------|------|------|-------|------|------|-------|
| Rheumatoid arthritis                        | 1.4  | 1.6  | -0.02 | 1.3  | 1.4  | -0.01 |
| Schizophrenia                               | 0.1  | 0.3  | -0.05 | 0.1  | 0.2  | -0.04 |
| Ulcerative colitis                          | 0.4  | 0.4  | -0.01 | 0.4  | 0.4  | -0.01 |
| Urinary tract infectious disease            | 7.6  | 9.4  | -0.06 | 7.8  | 7.7  | 0.00  |
| Viral hepatitis C                           | 0.5  | 0.5  | 0.00  | 0.5  | 0.5  | 0.00  |
| Visual system disorder                      | 21.0 | 28.1 | -0.17 | 21.7 | 21.3 | 0.01  |
| Medical history: Cardiovascular disease     |      |      |       |      |      |       |
| Atrial fibrillation                         | 2.3  | 4.5  | -0.12 | 2.5  | 2.5  | 0.00  |
| Cerebrovascular disease                     | 2.5  | 3.7  | -0.07 | 2.5  | 2.5  | 0.00  |
| Coronary arteriosclerosis                   | 6.8  | 9.3  | -0.09 | 6.7  | 6.7  | 0.00  |
| Heart disease                               | 26.0 | 26.6 | -0.02 | 23.9 | 24.1 | 0.00  |
| Heart failure                               | 1.6  | 1.8  | -0.02 | 1.5  | 1.3  | 0.02  |
| Ischemic heart disease                      | 5.4  | 6.2  | -0.03 | 4.9  | 5.2  | -0.01 |
| Peripheral vascular disease                 | 8.7  | 10.6 | -0.06 | 8.5  | 8.2  | 0.01  |
| Pulmonary embolism                          | 0.4  | 0.6  | -0.02 | 0.4  | 0.4  | 0.00  |
| Venous thrombosis                           | 1.5  | 1.8  | -0.02 | 1.5  | 1.4  | 0.01  |
| Medical history: Neoplasms                  |      |      |       |      |      |       |
| Hematologic neoplasm                        | 0.9  | 1.2  | -0.02 | 0.9  | 0.8  | 0.01  |
| Malignant lymphoma                          | 0.3  | 0.4  | -0.02 | 0.3  | 0.3  | 0.00  |
| Malignant neoplasm of anorectum             | 0.2  | 0.2  | -0.01 | 0.2  | 0.1  | 0.01  |
| Malignant neoplastic disease                | 6.5  | 8.9  | -0.09 | 6.7  | 6.5  | 0.01  |
| Malignant tumor of breast                   | 1.2  | 1.7  | -0.04 | 1.2  | 1.1  | 0.01  |
| Malignant tumor of colon                    | 0.2  | 0.5  | -0.04 | 0.3  | 0.3  | -0.01 |
| Malignant tumor of lung                     | 0.2  | 0.5  | -0.04 | 0.2  | 0.3  | -0.01 |
| Malignant tumor of urinary bladder          | 0.2  | 0.4  | -0.04 | 0.2  | 0.2  | -0.01 |
| Primary malignant neoplasm of prostate      | 0.7  | 1.3  | -0.06 | 0.8  | 0.8  | -0.01 |
| Medication use                              |      |      |       |      |      |       |
| Antibacterials for systemic use             | 50.5 | 44.9 | 0.11  | 48.7 | 50.0 | -0.03 |
| Antidepressants                             | 21.4 | 21.1 | 0.01  | 21.0 | 21.3 | -0.01 |
| Antiepileptics                              | 8.9  | 9.0  | 0.00  | 8.8  | 9.1  | -0.01 |
| Antiinflammatory and antirheumatic products | 23.9 | 21.0 | 0.07  | 23.4 | 23.9 | -0.01 |
| Antineoplastic agents                       | 1.9  | 2.3  | -0.02 | 1.9  | 1.8  | 0.00  |
| Antipsoriatics                              | 0.6  | 0.4  | 0.04  | 0.6  | 0.5  | 0.02  |
| Antithrombotic agents                       | 4.9  | 7.0  | -0.09 | 5.0  | 4.9  | 0.01  |
| Drugs for acid related disorders            | 14.8 | 15.0 | -0.01 | 14.6 | 14.7 | 0.00  |
| Drugs for obstructive airway diseases       | 18.9 | 15.6 | 0.09  | 17.8 | 18.7 | -0.02 |
| Drugs used in diabetes                      | 4.5  | 5.6  | -0.05 | 4.4  | 4.4  | 0.00  |
| Immunosuppressants                          | 1.9  | 1.7  | 0.01  | 1.9  | 1.7  | 0.01  |
| Lipid modifying agents                      | 23.1 | 24.9 | -0.04 | 21.9 | 21.8 | 0.00  |
| Opioids                                     | 16.0 | 16.9 | -0.02 | 15.9 | 16.2 | -0.01 |
| Psycholeptics                               | 24.1 | 22.6 | 0.03  | 23.1 | 23.9 | -0.02 |

|                                                          |     |     |      |     |     |      |
|----------------------------------------------------------|-----|-----|------|-----|-----|------|
| Psychostimulants, agents used for ADHD and<br>nootropics | 5.0 | 3.2 | 0.09 | 4.6 | 4.7 | 0.00 |
| Optum, Optum ClinFormatics                               |     |     |      |     |     |      |

---



**Table S2 c. Baseline characteristics for nebivolol and atenolol new-users in the PanTher database before and after propensity score matching**

| Characteristic                           | Before matching |                |              | After matching  |                |              |
|------------------------------------------|-----------------|----------------|--------------|-----------------|----------------|--------------|
|                                          | Nebivolol,<br>% | Atenolol,<br>% | Std.<br>diff | Nebivolol,<br>% | Atenolol,<br>% | Std.<br>diff |
| Age group                                |                 |                |              |                 |                |              |
| 15-19                                    | 0.2             | 0.4            | -0.03        | 0.2             | 0.3            | -0.01        |
| 20-24                                    | 0.9             | 0.9            | 0.01         | 0.9             | 1.0            | 0.00         |
| 25-29                                    | 2.3             | 1.8            | 0.04         | 2.3             | 2.3            | 0.00         |
| 30-34                                    | 4.3             | 2.9            | 0.08         | 4.2             | 4.3            | 0.00         |
| 35-39                                    | 6.8             | 4.1            | 0.12         | 6.5             | 6.7            | -0.01        |
| 40-44                                    | 9.4             | 5.9            | 0.13         | 9.1             | 9.3            | -0.01        |
| 45-49                                    | 11.7            | 8.4            | 0.11         | 11.4            | 11.6           | -0.01        |
| 50-54                                    | 13.9            | 11.5           | 0.07         | 13.8            | 13.8           | 0.00         |
| 55-59                                    | 14.3            | 13.0           | 0.04         | 14.4            | 14.3           | 0.00         |
| 60-64                                    | 12.2            | 12.6           | -0.01        | 12.4            | 12.2           | 0.00         |
| 65-69                                    | 8.7             | 11.2           | -0.08        | 8.9             | 8.8            | 0.00         |
| 70-74                                    | 6.1             | 9.0            | -0.11        | 6.3             | 6.1            | 0.01         |
| 75-79                                    | 4.2             | 7.8            | -0.15        | 4.3             | 4.1            | 0.01         |
| 80-84                                    | 3.8             | 8.3            | -0.19        | 4.0             | 3.8            | 0.01         |
| 85-89                                    | 1.1             | 2.3            | -0.09        | 1.1             | 1.1            | 0.00         |
| Gender: female                           | 52.3            | 57.0           | -0.10        | 52.8            | 52.4           | 0.01         |
| Race                                     |                 |                |              |                 |                |              |
| race = Asian                             | 1.7             | 1.8            | -0.01        | 1.7             | 1.8            | -0.01        |
| race = Black or African American         | 8.1             | 6.0            | 0.08         | 8.0             | 8.2            | -0.01        |
| race = White                             | 84.2            | 85.5           | -0.04        | 84.2            | 84.0           | 0.01         |
| Ethnicity                                |                 |                |              |                 |                |              |
| ethnicity = Hispanic or Latino           | 3.1             | 3.4            | -0.02        | 3.2             | 3.1            | 0.00         |
| Medical history: General                 |                 |                |              |                 |                |              |
| Acute respiratory disease                | 13.4            | 11.8           | 0.05         | 12.7            | 12.9           | 0.00         |
| Attention deficit hyperactivity disorder | 1.6             | 1.0            | 0.06         | 1.4             | 1.4            | 0.00         |
| Chronic liver disease                    | 1.4             | 1.3            | 0.01         | 1.4             | 1.4            | 0.00         |
| Chronic obstructive lung disease         | 3.7             | 4.3            | -0.03        | 3.7             | 3.7            | 0.00         |
| Crohn's disease                          | 0.4             | 0.4            | -0.01        | 0.4             | 0.4            | -0.01        |
| Dementia                                 | 0.8             | 1.9            | -0.09        | 0.9             | 0.8            | 0.00         |
| Depressive disorder                      | 10.1            | 11.8           | -0.05        | 9.8             | 9.8            | 0.00         |
| Diabetes mellitus                        | 8.6             | 11.5           | -0.10        | 8.7             | 8.6            | 0.00         |
| Gastroesophageal reflux disease          | 13.7            | 14.6           | -0.02        | 13.5            | 13.7           | -0.01        |
| Gastrointestinal hemorrhage              | 1.2             | 1.7            | -0.05        | 1.2             | 1.3            | -0.01        |
| Human immunodeficiency virus infection   | 0.2             | 0.2            | -0.01        | 0.2             | 0.2            | 0.00         |
| Hyperlipidemia                           | 37.5            | 43.7           | -0.13        | 37.4            | 36.8           | 0.01         |
| Hypertensive disorder                    | 97.3            | 97.3           | 0.00         | 97.2            | 97.0           | 0.01         |

|                                               |      |      |       |      |      |       |
|-----------------------------------------------|------|------|-------|------|------|-------|
| Lesion of liver                               | 0.4  | 0.5  | -0.03 | 0.4  | 0.4  | 0.00  |
| Obesity                                       | 9.8  | 9.0  | 0.03  | 9.6  | 10.0 | -0.01 |
| Osteoarthritis                                | 11.2 | 13.5 | -0.07 | 11.3 | 10.9 | 0.01  |
| Pneumonia                                     | 1.7  | 2.2  | -0.04 | 1.6  | 1.6  | 0.01  |
| Psoriasis                                     | 0.7  | 0.9  | -0.02 | 0.7  | 0.7  | 0.00  |
| Renal impairment                              | 2.3  | 3.2  | -0.06 | 2.3  | 2.3  | 0.00  |
| Rheumatoid arthritis                          | 1.1  | 1.3  | -0.02 | 1.1  | 1.1  | 0.00  |
| Schizophrenia                                 | 0.1  | 0.5  | -0.06 | 0.1  | 0.1  | 0.00  |
| Ulcerative colitis                            | 0.3  | 0.3  | -0.01 | 0.3  | 0.3  | 0.00  |
| Urinary tract infectious disease              | 3.7  | 5.3  | -0.08 | 3.7  | 3.6  | 0.00  |
| Viral hepatitis C                             | 0.5  | 0.7  | -0.02 | 0.5  | 0.5  | 0.00  |
| Visual system disorder                        | 6.9  | 10.3 | -0.12 | 6.8  | 6.6  | 0.01  |
| Medical history: Cardiovascular disease       |      |      |       |      |      |       |
| Atrial fibrillation                           | 3.0  | 4.3  | -0.07 | 3.1  | 3.1  | 0.00  |
| Cerebrovascular disease                       | 1.6  | 2.0  | -0.03 | 1.6  | 1.5  | 0.01  |
| Coronary arteriosclerosis                     | 7.5  | 9.7  | -0.08 | 7.5  | 7.6  | 0.00  |
| Heart disease                                 | 19.9 | 22.3 | -0.06 | 19.8 | 19.9 | 0.00  |
| Heart failure                                 | 1.1  | 1.1  | 0.00  | 1.1  | 1.1  | 0.00  |
| Ischemic heart disease                        | 3.4  | 3.9  | -0.03 | 3.4  | 3.5  | -0.01 |
| Peripheral vascular disease                   | 5.9  | 6.8  | -0.04 | 5.9  | 5.7  | 0.01  |
| Pulmonary embolism                            | 0.4  | 0.5  | -0.02 | 0.4  | 0.3  | 0.00  |
| Venous thrombosis                             | 0.9  | 1.2  | -0.03 | 0.9  | 0.9  | 0.00  |
| Medical history: Neoplasms                    |      |      |       |      |      |       |
| Hematologic neoplasm                          | 0.6  | 0.8  | -0.02 | 0.5  | 0.6  | -0.01 |
| Malignant lymphoma                            | 0.3  | 0.4  | 0.00  | 0.3  | 0.3  | 0.01  |
| Malignant neoplasm of anorectum               | 0.1  | 0.2  | -0.02 | 0.1  | 0.1  | 0.00  |
| Malignant neoplastic disease                  | 5.2  | 7.0  | -0.08 | 5.3  | 5.2  | 0.01  |
| Malignant tumor of breast                     | 1.0  | 1.5  | -0.04 | 1.0  | 1.1  | 0.00  |
| Malignant tumor of colon                      | 0.3  | 0.4  | -0.02 | 0.3  | 0.3  | 0.01  |
| Malignant tumor of lung                       | 0.2  | 0.3  | -0.02 | 0.2  | 0.2  | 0.00  |
| Malignant tumor of urinary bladder            | 0.2  | 0.3  | -0.03 | 0.2  | 0.2  | 0.00  |
| Primary malignant neoplasm of prostate        | 0.7  | 1.0  | -0.04 | 0.7  | 0.6  | 0.01  |
| Medication use                                |      |      |       |      |      |       |
| Agents acting on the renin-angiotensin system | 0.0  | 0.0  | 0.00  | 0.0  | 0.0  | 0.00  |
| Antibacterials for systemic use               | 25.1 | 23.0 | 0.05  | 24.1 | 24.2 | 0.00  |
| Antidepressants                               | 23.5 | 24.2 | -0.02 | 22.8 | 23.2 | -0.01 |
| Antiepileptics                                | 10.3 | 11.0 | -0.02 | 10.2 | 10.3 | 0.00  |
| Antiinflammatory and antirheumatic products   | 25.4 | 25.0 | 0.01  | 25.0 | 25.1 | 0.00  |
| Antineoplastic agents                         | 1.2  | 1.3  | -0.01 | 1.2  | 1.2  | 0.00  |
| Antipsoriatics                                | 0.2  | 0.2  | 0.00  | 0.2  | 0.2  | -0.01 |
| Antithrombotic agents                         | 24.3 | 29.9 | -0.13 | 24.6 | 24.3 | 0.01  |

|                                                          |      |      |       |      |      |       |
|----------------------------------------------------------|------|------|-------|------|------|-------|
| Drugs for acid related disorders                         | 25.6 | 27.6 | -0.05 | 25.1 | 25.5 | -0.01 |
| Drugs for obstructive airway diseases                    | 21.8 | 21.4 | 0.01  | 21.2 | 21.5 | -0.01 |
| Drugs used in diabetes                                   | 6.7  | 8.5  | -0.07 | 6.7  | 6.6  | 0.00  |
| Immunosuppressants                                       | 1.8  | 1.8  | 0.00  | 1.8  | 1.7  | 0.00  |
| Lipid modifying agents                                   | 26.2 | 32.6 | -0.14 | 26.1 | 25.5 | 0.01  |
| Opioids                                                  | 18.5 | 20.0 | -0.04 | 18.4 | 18.4 | 0.00  |
| Psycholeptics                                            | 25.9 | 26.2 | -0.01 | 25.3 | 25.6 | -0.01 |
| Psychostimulants, agents used for ADHD and<br>nootropics | 4.3  | 2.8  | 0.08  | 3.9  | 4.1  | -0.01 |

---

PanTher, Optum® de-identified Electronic Health Record Dataset

**Table S2 d. Baseline characteristics for nebivolol and atenolol new-users in the CCAE database before and after propensity score stratification**

| Characteristic                           | Before stratification |                |              | After stratification |                |              |
|------------------------------------------|-----------------------|----------------|--------------|----------------------|----------------|--------------|
|                                          | Nebivolol,<br>%       | Atenolol,<br>% | Std.<br>diff | Nebivolol,<br>%      | Atenolol,<br>% | Std.<br>diff |
| Age group                                |                       |                |              |                      |                |              |
| 15-19                                    | 0.4                   | 1.1            | -0.09        | 0.9                  | 0.9            | 0.00         |
| 20-24                                    | 1.6                   | 2.1            | -0.04        | 1.8                  | 1.9            | -0.01        |
| 25-29                                    | 3.3                   | 3.6            | -0.02        | 3.4                  | 3.5            | 0.00         |
| 30-34                                    | 6.1                   | 6.1            | 0.00         | 5.9                  | 6.0            | 0.00         |
| 35-39                                    | 9.9                   | 8.8            | 0.04         | 9.1                  | 9.2            | 0.00         |
| 40-44                                    | 13.8                  | 12.0           | 0.05         | 12.5                 | 12.7           | -0.01        |
| 45-49                                    | 16.8                  | 15.2           | 0.04         | 15.5                 | 15.7           | -0.01        |
| 50-54                                    | 18.5                  | 17.3           | 0.03         | 17.9                 | 17.8           | 0.00         |
| 55-59                                    | 16.2                  | 16.9           | -0.02        | 16.9                 | 16.7           | 0.01         |
| 60-64                                    | 12.4                  | 15.1           | -0.08        | 14.8                 | 14.2           | 0.02         |
| 65-69                                    | 1.0                   | 1.4            | -0.04        | 1.3                  | 1.3            | 0.00         |
| Gender: female                           | 45.7                  | 52.6           | -0.14        | 50.9                 | 50.1           | 0.02         |
| Medical history: General                 |                       |                |              |                      |                |              |
| Acute respiratory disease                | 29.2                  | 27.1           | 0.05         | 28.6                 | 28.1           | 0.01         |
| Attention deficit hyperactivity disorder | 2.0                   | 1.7            | 0.02         | 1.9                  | 1.8            | 0.01         |
| Chronic liver disease                    | 1.7                   | 1.7            | 0.00         | 1.8                  | 1.7            | 0.01         |
| Chronic obstructive lung disease         | 1.9                   | 1.9            | 0.00         | 2.2                  | 1.9            | 0.02         |
| Crohn's disease                          | 0.4                   | 0.4            | 0.00         | 0.4                  | 0.4            | 0.01         |
| Dementia                                 | 0.1                   | 0.2            | -0.02        | 0.1                  | 0.2            | -0.01        |
| Depressive disorder                      | 9.2                   | 10.6           | -0.05        | 10.7                 | 10.1           | 0.02         |
| Diabetes mellitus                        | 6.3                   | 6.9            | -0.02        | 7.2                  | 6.7            | 0.02         |
| Gastroesophageal reflux disease          | 10.5                  | 9.9            | 0.02         | 10.7                 | 10.2           | 0.02         |
| Gastrointestinal hemorrhage              | 1.8                   | 1.9            | -0.01        | 1.9                  | 1.9            | 0.00         |
| Human immunodeficiency virus infection   | 0.2                   | 0.2            | 0.00         | 0.2                  | 0.2            | -0.01        |
| Hyperlipidemia                           | 37.5                  | 32.9           | 0.10         | 35.4                 | 34.8           | 0.01         |
| Hypertensive disorder                    | 100.0                 | 100.0          | 0.00         | 100.0                | 100.0          | 0.00         |
| Lesion of liver                          | 0.3                   | 0.4            | -0.01        | 0.3                  | 0.3            | 0.00         |
| Obesity                                  | 8.2                   | 8.3            | 0.00         | 8.5                  | 8.4            | 0.00         |
| Osteoarthritis                           | 13.4                  | 13.3           | 0.00         | 14.0                 | 13.5           | 0.02         |
| Pneumonia                                | 1.5                   | 1.6            | -0.01        | 1.6                  | 1.6            | 0.00         |
| Psoriasis                                | 1.0                   | 1.0            | 0.00         | 1.0                  | 1.0            | 0.00         |
| Renal impairment                         | 1.0                   | 1.0            | 0.00         | 1.0                  | 1.0            | 0.00         |
| Rheumatoid arthritis                     | 1.0                   | 1.0            | -0.01        | 1.1                  | 1.0            | 0.01         |
| Schizophrenia                            | 0.0                   | 0.1            | -0.03        | 0.1                  | 0.1            | -0.01        |
| Ulcerative colitis                       | 0.3                   | 0.4            | -0.01        | 0.4                  | 0.4            | 0.00         |
| Urinary tract infectious disease         | 6.4                   | 6.8            | -0.02        | 7.1                  | 6.7            | 0.02         |

|                                                          |      |      |       |      |      |       |
|----------------------------------------------------------|------|------|-------|------|------|-------|
| Viral hepatitis C                                        | 0.3  | 0.5  | -0.02 | 0.4  | 0.4  | 0.00  |
| Visual system disorder                                   | 15.8 | 16.0 | 0.00  | 16.3 | 16.0 | 0.01  |
| Medical history: Cardiovascular disease                  |      |      |       |      |      |       |
| Atrial fibrillation                                      | 1.1  | 1.7  | -0.04 | 1.6  | 1.5  | 0.01  |
| Cerebrovascular disease                                  | 1.7  | 1.8  | -0.01 | 2.0  | 1.8  | 0.01  |
| Coronary arteriosclerosis                                | 4.3  | 3.9  | 0.02  | 4.5  | 4.2  | 0.02  |
| Heart disease                                            | 19.1 | 16.7 | 0.06  | 18.8 | 17.7 | 0.03  |
| Heart failure                                            | 0.8  | 0.6  | 0.02  | 0.7  | 0.6  | 0.01  |
| Ischemic heart disease                                   | 3.5  | 3.3  | 0.01  | 3.8  | 3.5  | 0.02  |
| Peripheral vascular disease                              | 5.6  | 4.8  | 0.04  | 5.5  | 5.1  | 0.02  |
| Pulmonary embolism                                       | 0.3  | 0.3  | -0.01 | 0.4  | 0.3  | 0.01  |
| Venous thrombosis                                        | 1.1  | 1.2  | 0.00  | 1.2  | 1.1  | 0.01  |
| Medical history: Neoplasms                               |      |      |       |      |      |       |
| Hematologic neoplasm                                     | 0.7  | 0.7  | 0.00  | 0.8  | 0.7  | 0.01  |
| Malignant lymphoma                                       | 0.3  | 0.3  | 0.00  | 0.3  | 0.3  | 0.02  |
| Malignant neoplasm of anorectum                          | 0.1  | 0.1  | 0.00  | 0.1  | 0.1  | 0.01  |
| Malignant neoplastic disease                             | 4.8  | 4.8  | 0.00  | 4.9  | 4.9  | 0.00  |
| Malignant tumor of breast                                | 1.0  | 1.0  | 0.00  | 1.0  | 1.0  | 0.00  |
| Malignant tumor of colon                                 | 0.2  | 0.2  | -0.01 | 0.2  | 0.2  | 0.01  |
| Malignant tumor of lung                                  | 0.1  | 0.2  | -0.01 | 0.1  | 0.2  | -0.01 |
| Malignant tumor of urinary bladder                       | 0.1  | 0.1  | 0.00  | 0.1  | 0.1  | 0.00  |
| Primary malignant neoplasm of prostate                   | 0.5  | 0.5  | 0.01  | 0.5  | 0.5  | -0.01 |
| Medication use                                           |      |      |       |      |      |       |
| Antibacterials for systemic use                          | 54.6 | 50.9 | 0.07  | 53.0 | 52.5 | 0.01  |
| Antidepressants                                          | 22.5 | 23.4 | -0.02 | 24.0 | 23.1 | 0.02  |
| Antiepileptics                                           | 9.0  | 9.0  | 0.00  | 9.7  | 9.1  | 0.02  |
| Antiinflammatory and antirheumatic products              | 26.2 | 26.0 | 0.00  | 26.7 | 26.2 | 0.01  |
| Antineoplastic agents                                    | 1.7  | 1.7  | 0.00  | 1.8  | 1.7  | 0.00  |
| Antipsoriatics                                           | 0.4  | 0.4  | 0.00  | 0.4  | 0.4  | 0.00  |
| Antithrombotic agents                                    | 4.3  | 4.7  | -0.02 | 5.1  | 4.7  | 0.02  |
| Drugs for acid related disorders                         | 16.7 | 16.5 | 0.00  | 17.0 | 16.7 | 0.01  |
| Drugs for obstructive airway diseases                    | 19.8 | 18.6 | 0.03  | 19.3 | 19.1 | 0.00  |
| Drugs used in diabetes                                   | 3.6  | 4.0  | -0.02 | 4.3  | 3.9  | 0.02  |
| Immunosuppressants                                       | 1.9  | 1.8  | 0.01  | 1.9  | 1.8  | 0.00  |
| Lipid modifying agents                                   | 20.8 | 18.7 | 0.05  | 20.0 | 19.4 | 0.01  |
| Opioids                                                  | 18.8 | 19.2 | -0.01 | 20.1 | 19.1 | 0.02  |
| Psycholeptics                                            | 26.7 | 27.1 | -0.01 | 28.4 | 27.1 | 0.03  |
| Psychostimulants, agents used for ADHD and<br>nootropics | 5.4  | 4.6  | 0.04  | 5.1  | 4.9  | 0.01  |

CCAE, Truven MarketScan Commercial Claims and Encounters

**Table S2 e. Baseline characteristics for nebivolol and atenolol new-users in the Optum database before and after propensity score stratification**

| Characteristic                           | Before stratification |                |              | After stratification |                |              |
|------------------------------------------|-----------------------|----------------|--------------|----------------------|----------------|--------------|
|                                          | Nebivolol,<br>%       | Atenolol,<br>% | Std.<br>diff | Nebivolol,<br>%      | Atenolol,<br>% | Std.<br>diff |
| Age group                                |                       |                |              |                      |                |              |
| 15-19                                    | 0.3                   | 0.6            | -0.05        | 0.3                  | 0.5            | -0.03        |
| 20-24                                    | 1.3                   | 1.1            | 0.02         | 1.2                  | 1.1            | 0.01         |
| 25-29                                    | 3.1                   | 2.6            | 0.03         | 2.7                  | 2.8            | 0.00         |
| 30-34                                    | 5.8                   | 4.0            | 0.08         | 4.5                  | 4.6            | 0.00         |
| 35-39                                    | 9.0                   | 6.1            | 0.11         | 6.8                  | 7.0            | -0.01        |
| 40-44                                    | 12.4                  | 7.6            | 0.16         | 8.5                  | 9.0            | -0.02        |
| 45-49                                    | 14.2                  | 10.3           | 0.12         | 11.0                 | 11.3           | -0.01        |
| 50-54                                    | 15.6                  | 11.4           | 0.12         | 12.4                 | 12.6           | -0.01        |
| 55-59                                    | 13.0                  | 11.8           | 0.04         | 11.9                 | 12.2           | -0.01        |
| 60-64                                    | 9.4                   | 10.0           | -0.02        | 10.0                 | 10.0           | 0.00         |
| 65-69                                    | 6.6                   | 11.6           | -0.17        | 10.2                 | 10.1           | 0.00         |
| 70-74                                    | 4.3                   | 9.1            | -0.19        | 8.6                  | 7.7            | 0.03         |
| 75-79                                    | 2.4                   | 6.5            | -0.20        | 5.7                  | 5.3            | 0.02         |
| 80-84                                    | 1.8                   | 5.3            | -0.18        | 5.0                  | 4.3            | 0.04         |
| 85-89                                    | 0.7                   | 1.9            | -0.11        | 1.4                  | 1.6            | -0.02        |
| Gender: female                           | 44.1                  | 53.6           | -0.19        | 53.1                 | 51.0           | 0.04         |
| Medical history: General                 |                       |                |              |                      |                |              |
| Acute respiratory disease                | 29.5                  | 25.9           | 0.08         | 27.4                 | 27.2           | 0.00         |
| Attention deficit hyperactivity disorder | 2.4                   | 1.3            | 0.08         | 1.6                  | 1.6            | 0.00         |
| Chronic liver disease                    | 2.1                   | 1.7            | 0.03         | 1.7                  | 1.8            | 0.00         |
| Chronic obstructive lung disease         | 4.1                   | 5.3            | -0.05        | 5.5                  | 4.9            | 0.03         |
| Crohn's disease                          | 0.4                   | 0.4            | 0.00         | 0.4                  | 0.4            | 0.00         |
| Dementia                                 | 0.5                   | 1.5            | -0.10        | 1.3                  | 1.3            | 0.00         |
| Depressive disorder                      | 11.2                  | 12.5           | -0.04        | 12.9                 | 12.1           | 0.02         |
| Diabetes mellitus                        | 9.3                   | 11.6           | -0.07        | 11.8                 | 10.9           | 0.03         |
| Gastroesophageal reflux disease          | 13.5                  | 14.2           | -0.02        | 14.9                 | 14.1           | 0.02         |
| Gastrointestinal hemorrhage              | 2.4                   | 2.7            | -0.02        | 2.5                  | 2.6            | -0.01        |
| Human immunodeficiency virus infection   | 0.4                   | 0.3            | 0.01         | 0.2                  | 0.3            | -0.02        |
| Hyperlipidemia                           | 47.2                  | 47.4           | 0.00         | 47.8                 | 47.3           | 0.01         |
| Hypertensive disorder                    | 100.0                 | 100.0          | 0.00         | 100.0                | 100.0          | 0.00         |
| Lesion of liver                          | 0.4                   | 0.6            | -0.03        | 0.5                  | 0.5            | 0.00         |
| Obesity                                  | 10.5                  | 9.0            | 0.05         | 9.3                  | 9.5            | -0.01        |
| Osteoarthritis                           | 17.6                  | 20.0           | -0.06        | 20.4                 | 19.4           | 0.02         |
| Pneumonia                                | 2.0                   | 2.6            | -0.04        | 2.8                  | 2.4            | 0.02         |
| Psoriasis                                | 1.4                   | 1.2            | 0.02         | 1.1                  | 1.2            | -0.01        |
| Renal impairment                         | 2.2                   | 3.7            | -0.09        | 4.1                  | 3.2            | 0.04         |

|                                             |      |      |       |      |      |       |
|---------------------------------------------|------|------|-------|------|------|-------|
| Rheumatoid arthritis                        | 1.4  | 1.6  | -0.02 | 1.4  | 1.6  | -0.01 |
| Schizophrenia                               | 0.1  | 0.3  | -0.05 | 0.2  | 0.3  | -0.02 |
| Ulcerative colitis                          | 0.4  | 0.4  | -0.01 | 0.4  | 0.4  | 0.00  |
| Urinary tract infectious disease            | 7.6  | 9.4  | -0.06 | 9.2  | 8.9  | 0.01  |
| Viral hepatitis C                           | 0.5  | 0.5  | 0.00  | 0.6  | 0.5  | 0.01  |
| Visual system disorder                      | 21.0 | 28.1 | -0.17 | 27.3 | 26.1 | 0.03  |
| Medical history: Cardiovascular disease     |      |      |       |      |      |       |
| Atrial fibrillation                         | 2.3  | 4.5  | -0.12 | 4.1  | 3.9  | 0.01  |
| Cerebrovascular disease                     | 2.5  | 3.7  | -0.07 | 3.9  | 3.3  | 0.03  |
| Coronary arteriosclerosis                   | 6.8  | 9.3  | -0.09 | 9.7  | 8.7  | 0.04  |
| Heart disease                               | 26.0 | 26.6 | -0.02 | 28.5 | 26.4 | 0.05  |
| Heart failure                               | 1.6  | 1.8  | -0.02 | 2.1  | 1.7  | 0.03  |
| Ischemic heart disease                      | 5.4  | 6.2  | -0.03 | 6.5  | 6.0  | 0.02  |
| Peripheral vascular disease                 | 8.7  | 10.6 | -0.06 | 10.9 | 10.0 | 0.03  |
| Pulmonary embolism                          | 0.4  | 0.6  | -0.02 | 0.5  | 0.5  | -0.01 |
| Venous thrombosis                           | 1.5  | 1.8  | -0.02 | 1.7  | 1.7  | 0.00  |
| Medical history: Neoplasms                  |      |      |       |      |      |       |
| Hematologic neoplasm                        | 0.9  | 1.2  | -0.02 | 1.1  | 1.1  | 0.01  |
| Malignant lymphoma                          | 0.3  | 0.4  | -0.02 | 0.3  | 0.4  | -0.01 |
| Malignant neoplasm of anorectum             | 0.2  | 0.2  | -0.01 | 0.3  | 0.2  | 0.02  |
| Malignant neoplastic disease                | 6.5  | 8.9  | -0.09 | 8.2  | 8.2  | 0.00  |
| Malignant tumor of breast                   | 1.2  | 1.7  | -0.04 | 1.5  | 1.5  | 0.00  |
| Malignant tumor of colon                    | 0.2  | 0.5  | -0.04 | 0.4  | 0.5  | 0.00  |
| Malignant tumor of lung                     | 0.2  | 0.5  | -0.04 | 0.4  | 0.4  | 0.00  |
| Malignant tumor of urinary bladder          | 0.2  | 0.4  | -0.04 | 0.4  | 0.4  | 0.00  |
| Primary malignant neoplasm of prostate      | 0.7  | 1.3  | -0.06 | 1.0  | 1.1  | -0.01 |
| Medication use                              |      |      |       |      |      |       |
| Antibacterials for systemic use             | 50.5 | 44.9 | 0.11  | 47.7 | 46.8 | 0.02  |
| Antidepressants                             | 21.4 | 21.1 | 0.01  | 22.1 | 21.3 | 0.02  |
| Antiepileptics                              | 8.9  | 9.0  | 0.00  | 9.5  | 9.1  | 0.01  |
| Antiinflammatory and antirheumatic products | 23.9 | 21.0 | 0.07  | 22.8 | 22.1 | 0.02  |
| Antineoplastic agents                       | 1.9  | 2.3  | -0.02 | 2.1  | 2.2  | 0.00  |
| Antipsoriatics                              | 0.6  | 0.4  | 0.04  | 0.6  | 0.4  | 0.03  |
| Antithrombotic agents                       | 4.9  | 7.0  | -0.09 | 7.4  | 6.4  | 0.04  |
| Drugs for acid related disorders            | 14.8 | 15.0 | -0.01 | 16.2 | 15.1 | 0.03  |
| Drugs for obstructive airway diseases       | 18.9 | 15.6 | 0.09  | 17.8 | 16.7 | 0.03  |
| Drugs used in diabetes                      | 4.5  | 5.6  | -0.05 | 5.5  | 5.3  | 0.01  |
| Immunosuppressants                          | 1.9  | 1.7  | 0.01  | 1.9  | 1.7  | 0.01  |
| Lipid modifying agents                      | 23.1 | 24.9 | -0.04 | 25.5 | 24.3 | 0.03  |
| Opioids                                     | 16.0 | 16.9 | -0.02 | 17.6 | 16.8 | 0.02  |
| Psycholeptics                               | 24.1 | 22.6 | 0.03  | 24.2 | 23.3 | 0.02  |

|                                                          |     |     |      |     |     |      |
|----------------------------------------------------------|-----|-----|------|-----|-----|------|
| Psychostimulants, agents used for ADHD and<br>nootropics | 5.0 | 3.2 | 0.09 | 3.8 | 3.8 | 0.00 |
| Optum, Optum ClinFormatics                               |     |     |      |     |     |      |

---



**Table S2 f. Baseline characteristics for nebivolol and atenolol new-users in the PanTher database before and after propensity score stratification**

| Characteristic                           | Before stratification |                |              | After stratification |                |              |
|------------------------------------------|-----------------------|----------------|--------------|----------------------|----------------|--------------|
|                                          | Nebivolol,<br>%       | Atenolol,<br>% | Std.<br>diff | Nebivolol,<br>%      | Atenolol,<br>% | Std.<br>diff |
| Age group                                |                       |                |              |                      |                |              |
| 15-19                                    | 0.2                   | 0.4            | -0.03        | 0.3                  | 0.4            | -0.02        |
| 20-24                                    | 0.9                   | 0.9            | 0.01         | 0.9                  | 0.9            | 0.00         |
| 25-29                                    | 2.3                   | 1.8            | 0.04         | 1.9                  | 1.9            | 0.00         |
| 30-34                                    | 4.3                   | 2.9            | 0.08         | 3.0                  | 3.1            | -0.01        |
| 35-39                                    | 6.8                   | 4.1            | 0.12         | 4.3                  | 4.6            | -0.01        |
| 40-44                                    | 9.4                   | 5.9            | 0.13         | 6.0                  | 6.5            | -0.02        |
| 45-49                                    | 11.7                  | 8.4            | 0.11         | 8.2                  | 9.0            | -0.03        |
| 50-54                                    | 13.9                  | 11.5           | 0.07         | 11.2                 | 11.9           | -0.02        |
| 55-59                                    | 14.3                  | 13.0           | 0.04         | 12.9                 | 13.3           | -0.01        |
| 60-64                                    | 12.2                  | 12.6           | -0.01        | 12.6                 | 12.5           | 0.00         |
| 65-69                                    | 8.7                   | 11.2           | -0.08        | 11.2                 | 10.7           | 0.01         |
| 70-74                                    | 6.1                   | 9.0            | -0.11        | 9.4                  | 8.5            | 0.03         |
| 75-79                                    | 4.2                   | 7.8            | -0.15        | 7.4                  | 7.1            | 0.01         |
| 80-84                                    | 3.8                   | 8.3            | -0.19        | 8.3                  | 7.5            | 0.03         |
| 85-89                                    | 1.1                   | 2.3            | -0.09        | 2.4                  | 2.1            | 0.02         |
| Gender: female                           | 52.3                  | 57.0           | -0.10        | 57.0                 | 56.2           | 0.02         |
| Race                                     |                       |                |              |                      |                |              |
| race = Asian                             | 1.7                   | 1.8            | -0.01        | 1.7                  | 1.8            | -0.01        |
| race = Black or African American         | 8.1                   | 6.0            | 0.08         | 6.3                  | 6.4            | 0.00         |
| race = White                             | 84.2                  | 85.5           | -0.04        | 85.7                 | 85.2           | 0.02         |
| Ethnicity                                |                       |                |              |                      |                |              |
| ethnicity = Hispanic or Latino           | 3.1                   | 3.4            | -0.02        | 3.0                  | 3.4            | -0.02        |
| Medical history: General                 |                       |                |              |                      |                |              |
| Acute respiratory disease                | 13.4                  | 11.8           | 0.05         | 11.4                 | 12.1           | -0.02        |
| Attention deficit hyperactivity disorder | 1.6                   | 1.0            | 0.06         | 1.0                  | 1.0            | 0.00         |
| Chronic liver disease                    | 1.4                   | 1.3            | 0.01         | 1.4                  | 1.3            | 0.01         |
| Chronic obstructive lung disease         | 3.7                   | 4.3            | -0.03        | 4.7                  | 4.2            | 0.02         |
| Crohn's disease                          | 0.4                   | 0.4            | -0.01        | 0.3                  | 0.4            | -0.01        |
| Dementia                                 | 0.8                   | 1.9            | -0.09        | 2.0                  | 1.7            | 0.03         |
| Depressive disorder                      | 10.1                  | 11.8           | -0.05        | 11.7                 | 11.4           | 0.01         |
| Diabetes mellitus                        | 8.6                   | 11.5           | -0.10        | 12.2                 | 11.0           | 0.04         |
| Gastroesophageal reflux disease          | 13.7                  | 14.6           | -0.02        | 14.8                 | 14.4           | 0.01         |
| Gastrointestinal hemorrhage              | 1.2                   | 1.7            | -0.05        | 1.4                  | 1.6            | -0.02        |
| Human immunodeficiency virus infection   | 0.2                   | 0.2            | -0.01        | 0.3                  | 0.2            | 0.01         |
| Hyperlipidemia                           | 37.5                  | 43.7           | -0.13        | 43.5                 | 42.5           | 0.02         |
| Hypertensive disorder                    | 97.3                  | 97.3           | 0.00         | 96.7                 | 97.3           | -0.03        |

|                                               |      |      |       |      |      |       |
|-----------------------------------------------|------|------|-------|------|------|-------|
| Lesion of liver                               | 0.4  | 0.5  | -0.03 | 0.5  | 0.5  | 0.00  |
| Obesity                                       | 9.8  | 9.0  | 0.03  | 9.1  | 9.2  | 0.00  |
| Osteoarthritis                                | 11.2 | 13.5 | -0.07 | 13.5 | 13.1 | 0.01  |
| Pneumonia                                     | 1.7  | 2.2  | -0.04 | 2.3  | 2.1  | 0.01  |
| Psoriasis                                     | 0.7  | 0.9  | -0.02 | 0.7  | 0.8  | -0.02 |
| Renal impairment                              | 2.3  | 3.2  | -0.06 | 3.4  | 3.1  | 0.02  |
| Rheumatoid arthritis                          | 1.1  | 1.3  | -0.02 | 1.2  | 1.3  | 0.00  |
| Schizophrenia                                 | 0.1  | 0.5  | -0.06 | 0.4  | 0.4  | 0.00  |
| Ulcerative colitis                            | 0.3  | 0.3  | -0.01 | 0.2  | 0.3  | -0.02 |
| Urinary tract infectious disease              | 3.7  | 5.3  | -0.08 | 5.4  | 5.1  | 0.01  |
| Viral hepatitis C                             | 0.5  | 0.7  | -0.02 | 0.6  | 0.6  | 0.00  |
| Visual system disorder                        | 6.9  | 10.3 | -0.12 | 8.6  | 9.7  | -0.04 |
| Medical history: Cardiovascular disease       |      |      |       |      |      |       |
| Atrial fibrillation                           | 3.0  | 4.3  | -0.07 | 4.8  | 4.1  | 0.03  |
| Cerebrovascular disease                       | 1.6  | 2.0  | -0.03 | 2.2  | 1.9  | 0.02  |
| Coronary arteriosclerosis                     | 7.5  | 9.7  | -0.08 | 10.9 | 9.4  | 0.05  |
| Heart disease                                 | 19.9 | 22.3 | -0.06 | 24.1 | 21.9 | 0.05  |
| Heart failure                                 | 1.1  | 1.1  | 0.00  | 1.4  | 1.1  | 0.02  |
| Ischemic heart disease                        | 3.4  | 3.9  | -0.03 | 4.3  | 3.9  | 0.02  |
| Peripheral vascular disease                   | 5.9  | 6.8  | -0.04 | 6.5  | 6.6  | 0.00  |
| Pulmonary embolism                            | 0.4  | 0.5  | -0.02 | 0.6  | 0.5  | 0.02  |
| Venous thrombosis                             | 0.9  | 1.2  | -0.03 | 1.0  | 1.1  | -0.01 |
| Medical history: Neoplasms                    |      |      |       |      |      |       |
| Hematologic neoplasm                          | 0.6  | 0.8  | -0.02 | 0.5  | 0.7  | -0.03 |
| Malignant lymphoma                            | 0.3  | 0.4  | 0.00  | 0.4  | 0.4  | 0.01  |
| Malignant neoplasm of anorectum               | 0.1  | 0.2  | -0.02 | 0.1  | 0.2  | -0.01 |
| Malignant neoplastic disease                  | 5.2  | 7.0  | -0.08 | 7.0  | 6.7  | 0.01  |
| Malignant tumor of breast                     | 1.0  | 1.5  | -0.04 | 1.5  | 1.4  | 0.01  |
| Malignant tumor of colon                      | 0.3  | 0.4  | -0.02 | 0.4  | 0.4  | 0.01  |
| Malignant tumor of lung                       | 0.2  | 0.3  | -0.02 | 0.4  | 0.3  | 0.01  |
| Malignant tumor of urinary bladder            | 0.2  | 0.3  | -0.03 | 0.4  | 0.3  | 0.02  |
| Primary malignant neoplasm of prostate        | 0.7  | 1.0  | -0.04 | 1.1  | 0.9  | 0.01  |
| Medication use                                |      |      |       |      |      |       |
| Agents acting on the renin-angiotensin system | 0.0  | 0.0  | 0.00  | 0.0  | 0.0  | -0.01 |
| Antibacterials for systemic use               | 25.1 | 23.0 | 0.05  | 23.7 | 23.2 | 0.01  |
| Antidepressants                               | 23.5 | 24.2 | -0.02 | 25.7 | 24.0 | 0.04  |
| Antiepileptics                                | 10.3 | 11.0 | -0.02 | 11.9 | 10.9 | 0.03  |
| Antiinflammatory and antirheumatic products   | 25.4 | 25.0 | 0.01  | 25.3 | 25.0 | 0.01  |
| Antineoplastic agents                         | 1.2  | 1.3  | -0.01 | 1.3  | 1.3  | 0.00  |
| Antipsoriatics                                | 0.2  | 0.2  | 0.00  | 0.2  | 0.2  | 0.00  |
| Antithrombotic agents                         | 24.3 | 29.9 | -0.13 | 31.3 | 28.9 | 0.05  |

|                                                          |      |      |       |      |      |      |
|----------------------------------------------------------|------|------|-------|------|------|------|
| Drugs for acid related disorders                         | 25.6 | 27.6 | -0.05 | 28.3 | 27.2 | 0.02 |
| Drugs for obstructive airway diseases                    | 21.8 | 21.4 | 0.01  | 23.8 | 21.4 | 0.06 |
| Drugs used in diabetes                                   | 6.7  | 8.5  | -0.07 | 8.9  | 8.2  | 0.03 |
| Immunosuppressants                                       | 1.8  | 1.8  | 0.00  | 1.9  | 1.8  | 0.01 |
| Lipid modifying agents                                   | 26.2 | 32.6 | -0.14 | 32.9 | 31.4 | 0.03 |
| Opioids                                                  | 18.5 | 20.0 | -0.04 | 21.1 | 19.8 | 0.03 |
| Psycholeptics                                            | 25.9 | 26.2 | -0.01 | 27.0 | 26.1 | 0.02 |
| Psychostimulants, agents used for adhd and<br>nootropics | 4.3  | 2.8  | 0.08  | 3.1  | 3.0  | 0.01 |

---

PanTher, Optum® de-identified Electronic Health Record Dataset

**Table S3. Hazard ratios of carvedilol and nebivolol compared to atenolol after excluding patients with previous history of heart failure, ischemic heart disease, or atrial fibrillation (Propensity score matching, on-treatment)**

| Target drug | Outcome / database                | Uncalibrated meta-analytic result |             |          | Calibrated meta-analytic result |             |          |
|-------------|-----------------------------------|-----------------------------------|-------------|----------|---------------------------------|-------------|----------|
|             |                                   | HR                                | 95% CI      | <i>P</i> | HR                              | 95% CI      | <i>P</i> |
| Carvedilol  | Acute myocardial infarction       |                                   |             |          |                                 |             |          |
|             | CCAIE                             | 1.13                              | 0.72 - 1.73 | 0.578    | 1.14                            | 0.74 - 1.76 | 0.526    |
|             | Optum                             | 1.22                              | 0.89 - 1.67 | 0.207    | 1.26                            | 0.91 - 1.82 | 0.161    |
|             | PanTher                           | 1.19                              | 0.80 - 1.74 | 0.391    | 1.05                            | 0.69 - 1.62 | 0.710    |
|             | Stroke                            |                                   |             |          |                                 |             |          |
|             | CCAIE                             | 0.96                              | 0.59 - 1.52 | 0.872    | 0.97                            | 0.61 - 1.55 | 0.923    |
|             | Optum                             | 0.94                              | 0.69 - 1.26 | 0.662    | 0.97                            | 0.69 - 1.35 | 0.833    |
|             | PanTher                           | 1.09                              | 0.75 - 1.57 | 0.638    | 0.98                            | 0.65 - 1.48 | 0.910    |
|             | Hospitalization for heart failure |                                   |             |          |                                 |             |          |
|             | CCAIE                             | 2.06                              | 1.48 - 2.86 | 0.000    | 2.06                            | 1.49 - 2.93 | 0.000    |
|             | Optum                             | 1.67                              | 1.36 - 2.06 | 0.000    | 1.72                            | 1.34 - 2.35 | 0.000    |
|             | PanTher                           | 2.10                              | 1.65 - 2.68 | 0.000    | 1.70                            | 1.24 - 2.58 | 0.000    |
| Nebivolol   | Acute myocardial infarction       |                                   |             |          |                                 |             |          |
|             | CCAIE                             | 1.12                              | 0.62 - 1.96 | 0.702    | 1.21                            | 0.65 - 2.27 | 0.532    |
|             | Optum                             | 0.51                              | 0.24 - 1.01 | 0.071    | 0.56                            | 0.20 - 1.17 | 0.120    |
|             | PanTher                           | 1.94                              | 0.97 - 3.70 | 0.052    | 1.19                            | NA          | 0.127    |
|             | Stroke                            |                                   |             |          |                                 |             |          |
|             | CCAIE                             | 1.11                              | 0.70 - 1.75 | 0.646    | 1.20                            | 0.73 - 2.02 | 0.449    |
|             | Optum                             | 0.98                              | 0.62 - 1.51 | 0.930    | 1.08                            | 0.66 - 1.81 | 0.799    |
|             | PanTher                           | 1.66                              | 0.88 - 2.95 | 0.103    | 1.13                            | NA          | 0.239    |
|             | Hospitalization for heart failure |                                   |             |          |                                 |             |          |

|               |                                   |      |             |       |      |             |       |
|---------------|-----------------------------------|------|-------------|-------|------|-------------|-------|
|               | CCAЕ                              | 0.36 | 0.16 - 0.72 | 0.008 | 0.38 | 0.17 - 0.83 | 0.014 |
|               | Optum                             | 1.15 | 0.75 - 1.73 | 0.503 | 1.27 | 0.83 - 2.19 | 0.318 |
|               | PanTher                           | 2.53 | 1.50 - 4.14 | 0.000 | 1.29 | NA          | 0.003 |
| Meta-analysis | Acute myocardial infarction       | 1.11 | 0.81 - 1.53 | 0.505 | 1.13 | 0.75 - 1.76 | 0.494 |
|               | Stroke                            | 1.10 | 0.90 - 1.34 | 0.370 | 1.11 | 0.81 - 1.59 | 0.368 |
|               | Hospitalization for heart failure | 1.47 | 0.93 - 2.32 | 0.097 | 1.49 | 0.90 - 2.70 | 0.096 |

Abbreviations: HR, Hazard ratio; CI, confidence interval; CCAE, Truven MarketScan Commercial Claims and Encounters; Optum, Optum ClinFormatics; PanTher, Optum® de-identified Electronic Health Record Dataset

**Table S4. Meta-analytic hazard ratios of carvedilol and nebivolol compared to atenolol using propensity scores without and with baseline blood pressure adjustment in the Optum® de-identified Electronic Health Record Dataset database (Propensity score matching, on-treatment)**

| Target drug | Outcome / database                | Uncalibrated meta-analytic result |             |          | Calibrated meta-analytic result |             |          |
|-------------|-----------------------------------|-----------------------------------|-------------|----------|---------------------------------|-------------|----------|
|             |                                   | HR                                | 95% CI      | <i>P</i> | HR                              | 95% CI      | <i>P</i> |
| Carvedilol  | Acute myocardial infarction       |                                   |             |          |                                 |             |          |
|             | Original*                         | 0.98                              | 0.66 - 1.45 | 0.933    | 0.91                            | 0.63 - 1.36 | 0.910    |
|             | Sensitivity†                      | 1.01                              | 0.66 - 1.51 | 0.981    | 0.93                            | 0.59 - 1.42 | 0.750    |
|             | Stroke                            |                                   |             |          |                                 |             |          |
|             | Original*                         | 1.01                              | 0.69-1.45   | 0.964    | 0.93                            | 0.66 - 1.37 | 0.730    |
|             | Sensitivity†                      | 0.98                              | 0.65 - 1.46 | 0.927    | 0.91                            | 0.58 - 1.38 | 0.663    |
|             | Hospitalization for heart failure |                                   |             |          |                                 |             |          |
|             | Original*                         | 1.81                              | 1.42 - 2.31 | <0.001   | 1.52                            | 1.31 - 2.18 | <0.001   |
|             | Sensitivity†                      | 1.73                              | 1.31 - 2.28 | <0.001   | 1.46                            | 1.08 - 2.22 | 0.002    |
|             | Acute myocardial infarction       |                                   |             |          |                                 |             |          |
| Nebivolol   | Original*                         | 2.25                              | 1.10 - 4.35 | 0.021    | 1.52                            | 0.92 - 2.70 | 0.056    |
|             | Sensitivity†                      | 0.94                              | 0.85 - 4.30 | 0.100    | 1.29                            | NA          | 0.173    |
|             | Stroke                            |                                   |             |          |                                 |             |          |
|             | Original*                         | 1.39                              | 0.69 - 2.58 | 0.334    | 1.09                            | 0.67 - 1.84 | 0.570    |
|             | Sensitivity†                      | 0.94                              | 0.40 - 1.94 | 0.885    | 0.92                            | NA          | 0.681    |
|             | Hospitalization for heart failure |                                   |             |          |                                 |             |          |
|             | Original*                         | 2.67                              | 1.58 - 4.40 | <0.001   | 1.72                            | 1.15 - 2.77 | 0.001    |
|             | Sensitivity†                      | 2.40                              | 1.36 - 4.12 | 0.002    | 1.41                            | NA          | 0.008    |

\*Estimates from original analysis were calculated based on large-scale propensity scores built without blood pressure measurements.

†Estimates from sensitivity analysis were calculated based on large-scale propensity scores additionally including blood pressure measurements.

Abbreviations: HR, Hazard ratio; CI, confidence interval

**Table S5. Meta-analytic hazard ratios of nebivolol compared to atenolol and other classes for primary outcomes (Propensity score matching, on-treatment)**

| Comparator drug | Outcome                           | Uncalibrated meta-analytic result |             |       | Calibrated meta-analytic result |             |       | I <sup>2</sup> |
|-----------------|-----------------------------------|-----------------------------------|-------------|-------|---------------------------------|-------------|-------|----------------|
|                 |                                   | HR                                | 95% CI      | P     | HR                              | 95% CI      | P     |                |
| Atenolol        | Acute myocardial infarction       | 1.04                              | 0.44 - 2.45 | 0.928 | 1.08                            | 0.48 - 2.47 | 0.839 | 0.798          |
|                 | Stroke                            | 1.23                              | 0.92 - 1.64 | 0.168 | 1.27                            | 0.96 - 1.68 | 0.094 | 0.000          |
|                 | Hospitalization for heart failure | 1.17                              | 0.50 - 2.74 | 0.721 | 1.21                            | 0.54 - 2.75 | 0.638 | 0.875          |
| ACEIs           | Acute myocardial infarction       | 1.37                              | 0.98 - 1.91 | 0.069 | 1.36                            | 0.95 - 2.06 | 0.077 | 0.550          |
|                 | Stroke                            | 1.40                              | 1.09 - 1.79 | 0.009 | 1.39                            | 1.04 - 1.98 | 0.017 | 0.438          |
|                 | Hospitalization for heart failure | 1.27                              | 0.94 - 1.71 | 0.126 | 1.27                            | 0.91 - 1.86 | 0.138 | 0.643          |
| ARBs            | Acute myocardial infarction       | 1.46                              | 1.08 - 1.97 | 0.013 | 1.42                            | 1.01 - 2.12 | 0.043 | 0.232          |
|                 | Stroke                            | 1.33                              | 1.06 - 1.66 | 0.013 | 1.29                            | 0.98 - 1.81 | 0.072 | 0.035          |
|                 | Hospitalization for heart failure | 1.22                              | 0.90 - 1.65 | 0.201 | 1.19                            | 0.83 - 1.76 | 0.321 | 0.457          |
| dCCBs           | Acute myocardial infarction       | 1.03                              | 0.46 - 2.32 | 0.935 | 1.07                            | 0.48 - 2.42 | 0.846 | 0.827          |
|                 | Stroke                            | 1.37                              | 1.07 - 1.76 | 0.012 | 1.40                            | 1.05 - 1.97 | 0.008 | 0.000          |
|                 | Hospitalization for heart failure | 1.01                              | 0.51 - 2.01 | 0.972 | 1.05                            | 0.53 - 2.11 | 0.866 | 0.844          |
| TDs             | Acute myocardial infarction       | 1.24                              | 0.70 - 2.21 | 0.466 | 1.29                            | 0.71 - 2.41 | 0.393 | 0.548          |
|                 | Stroke                            | 1.51                              | 1.18 - 1.93 | 0.001 | 1.56                            | 1.17 - 2.20 | 0.001 | 0.000          |
|                 | Hospitalization for heart failure | 0.92                              | 0.59 - 1.43 | 0.708 | 0.96                            | 0.59 - 1.55 | 0.849 | 0.508          |

Abbreviations: HR, Hazard ratio; CI, confidence interval; ACEI, angiotensin-converting enzyme inhibitors; ARB, angiotensin receptor blocker; dCCB, dihydropyridine calcium-channel blocker; TD, thiazide, or thiazide-like diuretics

**Figure S1. Covariate balance plot before and after propensity score matching between carvedilol and atenolol**

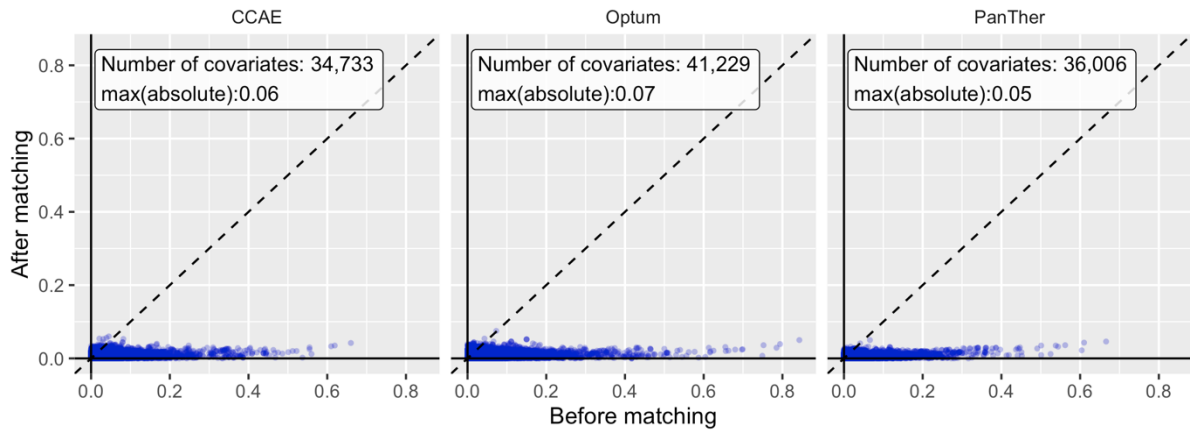

The covariate balances before and after PS matching were depicted. After PS matching, every standardized mean difference from more than 30,000 covariates does not exceed 0.1.

Abbreviation: PS, propensity score; CCAE, Truven MarketScan Commercial Claims and Encounters; Optum, Optum ClinFormatics; PanTher, Optum® de-identified Electronic Health Record Dataset



**Figure S2. Covariate balance plot before and after propensity score matching between nebivolol and atenolol**

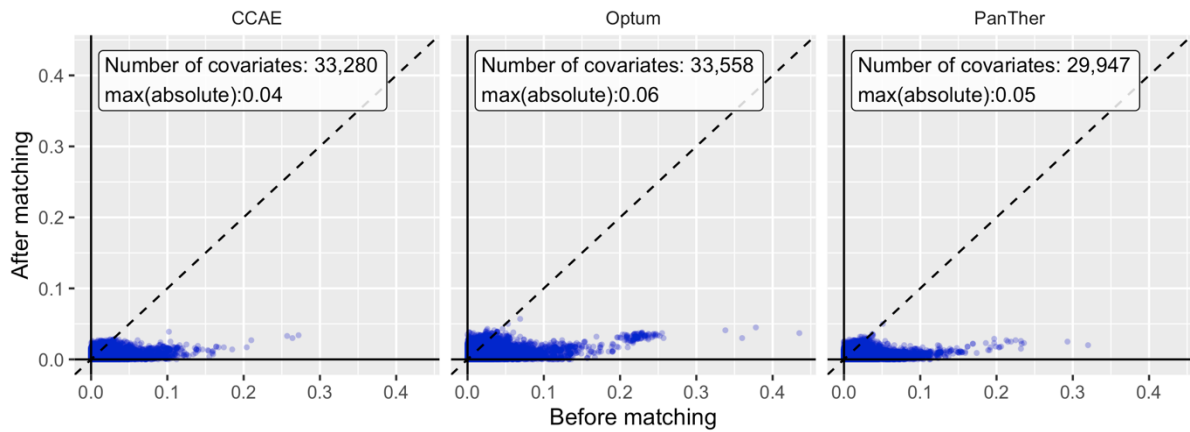

The covariate balances before and after PS matching were depicted. After PS matching, every standardized mean difference from more than 20,000 covariates does not exceed 0.1.

Abbreviation: PS, propensity score; CCAE, Truven MarketScan Commercial Claims and Encounters; Optum, Optum ClinFormatics; PanTher, Optum® de-identified Electronic Health Record Dataset

**Figure S3. Preference score distribution before propensity score adjustment between carvedilol and atenolol**

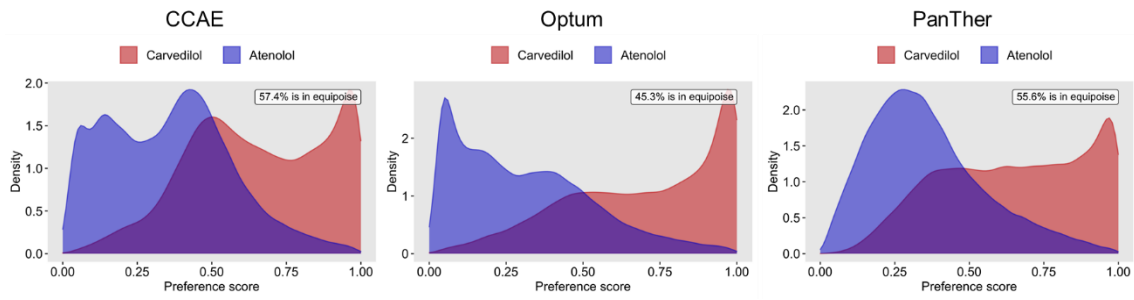

The preference score is a transformation of the propensity score that adjusts for differences in the sizes of the two treatment groups. A higher overlap indicates subjects in the two groups were more similar in terms of their predicted probability of receiving one treatment over the other. In the Optum database, only 45.3% population were in equipoise (preference score between 0.25 and 0.75), while the results in the CCAE and the PanTher shows sufficient equipoise (majority of both distributions being between 0.25 and 0.75).  
Abbreviation: CCAE, Truven MarketScan Commercial Claims and Encounters; Optum, Optum ClinFormatics; PanTher, Optum® de-identified Electronic Health Record Dataset

**Figure S4. Preference score distribution before propensity score adjustment between nebivolol and atenolol**

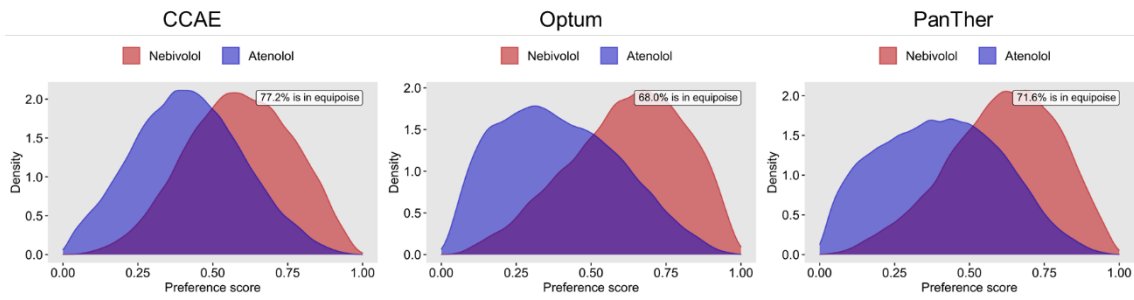

The preference score is a transformation of the propensity score that adjusts for differences in the sizes of the two treatment groups. A higher overlap indicates subjects in the two groups were more similar in terms of their predicted probability of receiving one treatment over the other. This plot shows sufficient equipoise (majority of both distributions being between 0.25 and 0.75) in all three databases that propensity score matching should be able to create balance without discounting a large proportion of the population, but it shows sufficient difference (non-overlap) that propensity score matching is necessary.

Abbreviation: CCAE, Truven MarketScan Commercial Claims and Encounters; Optum, Optum ClinFormatics; PanTher, Optum® de-identified Electronic Health Record Dataset

**Figure S5. Systematic error control of effect estimation comparing the third-generation beta-blockers (carvedilol and nebivolol) and atenolol users in the meta-analysis under an on-treatment, PS-matching design.**

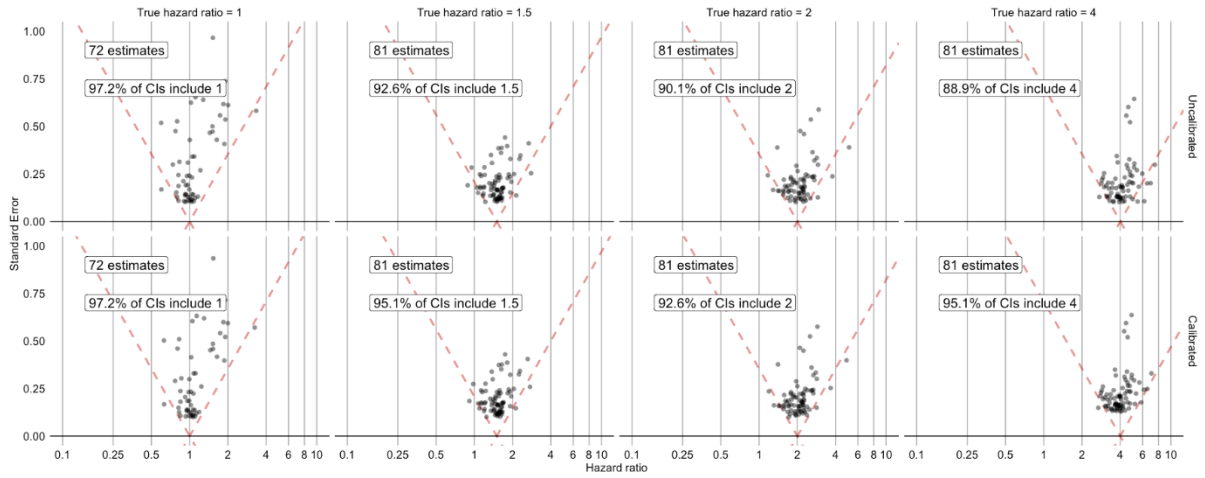

The top plots hazard ratios and their corresponding standard errors before calibration for each negative and synthetic positive control. The bottom plots the same estimates after empirical calibration. The left plots with hazard ratios = 1 present negative controls, while plots with hazard ratios >1 present synthetic positive controls.

**Figure S6. Kaplan-Meier plots for acute myocardial infarction between the third-generation beta-blockers users and atenolol users**

**Figure S6 a: Carvedilol versus atenolol in the CCAE**

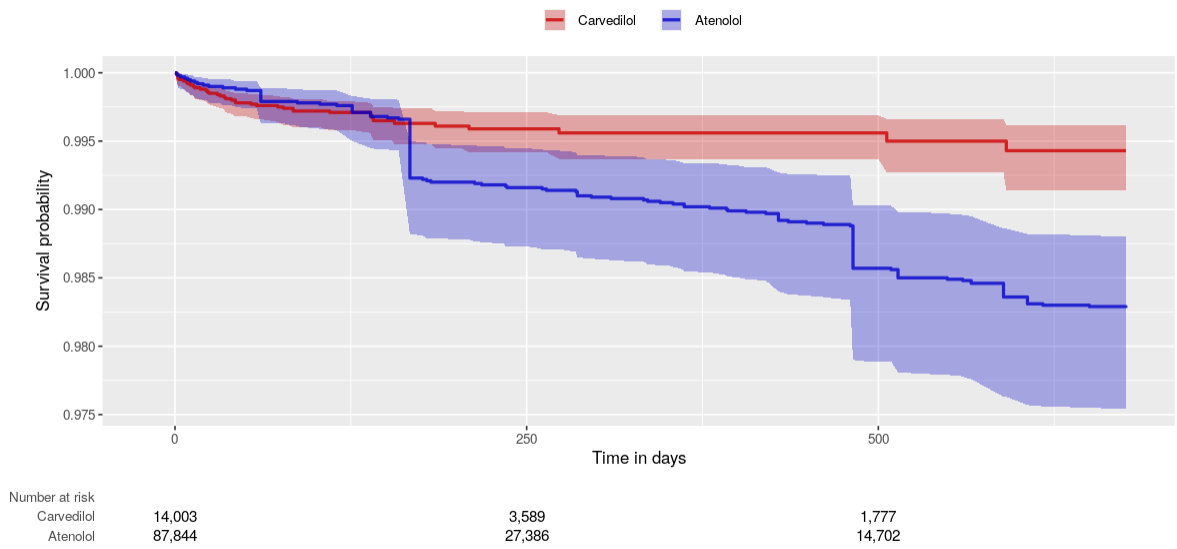

**Figure S12 b: Carvedilol versus atenolol in the PanTher**

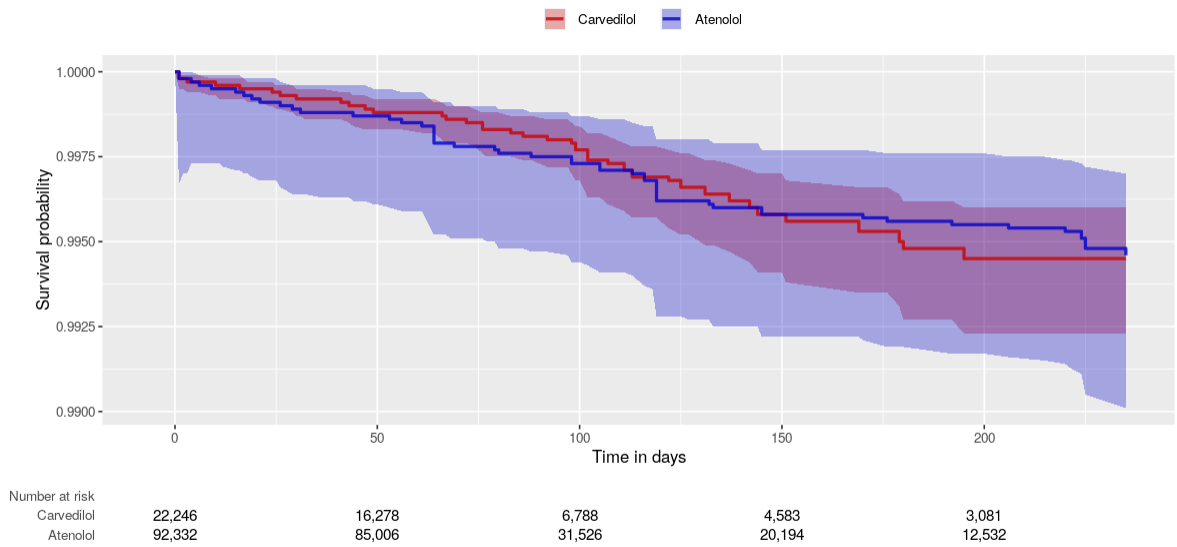

**Figure S6 c: Nebivolol versus atenolol in the CCAE**

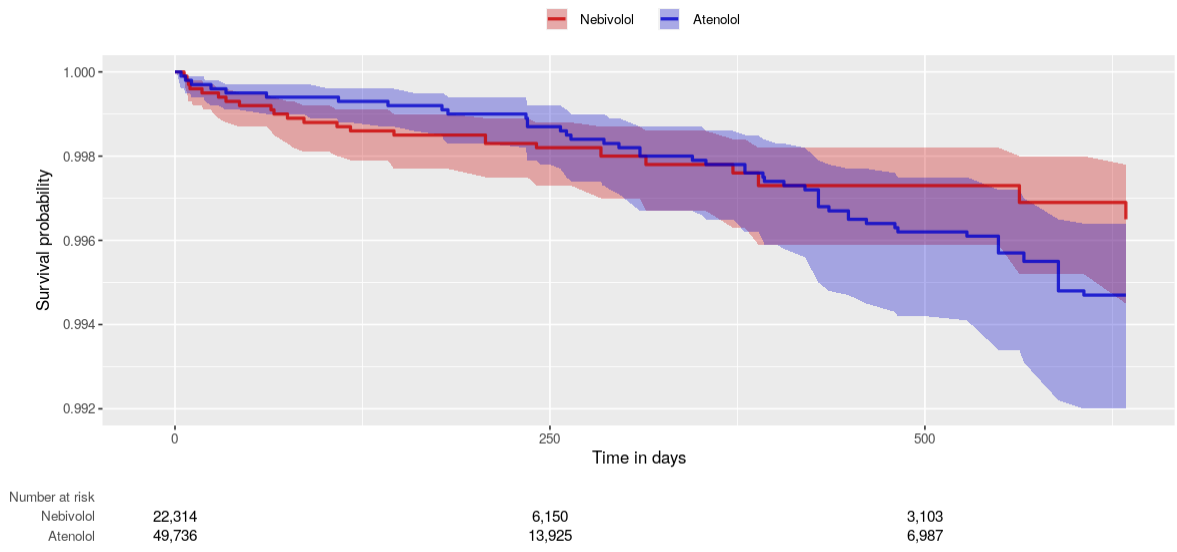

**Figure S6 d: Nebivolol versus atenolol in the Optum**

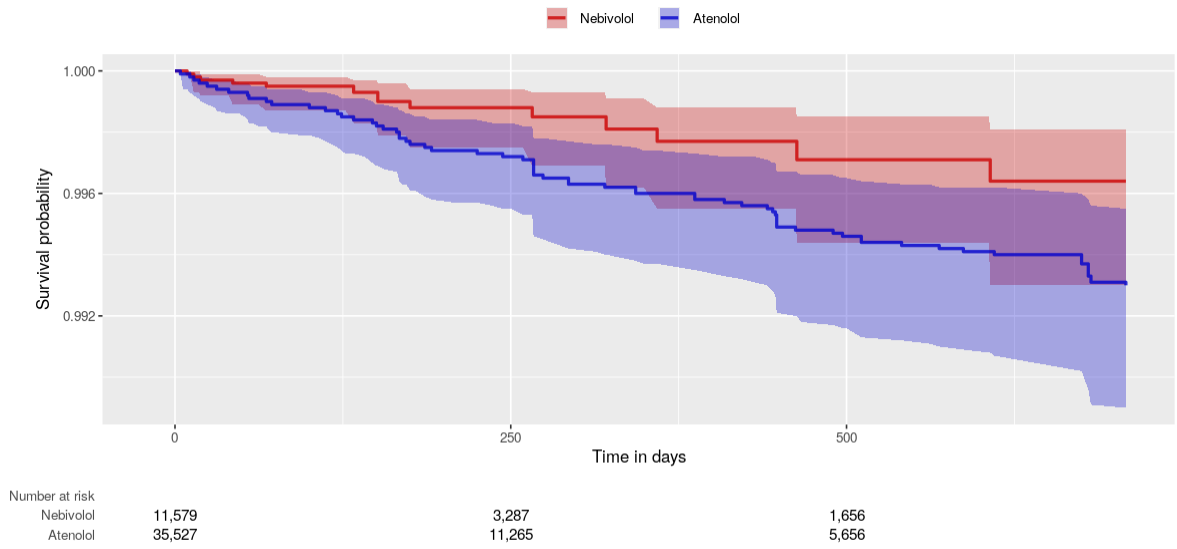

**Figure S6 e: Nebivolol versus atenolol in the PanTher**

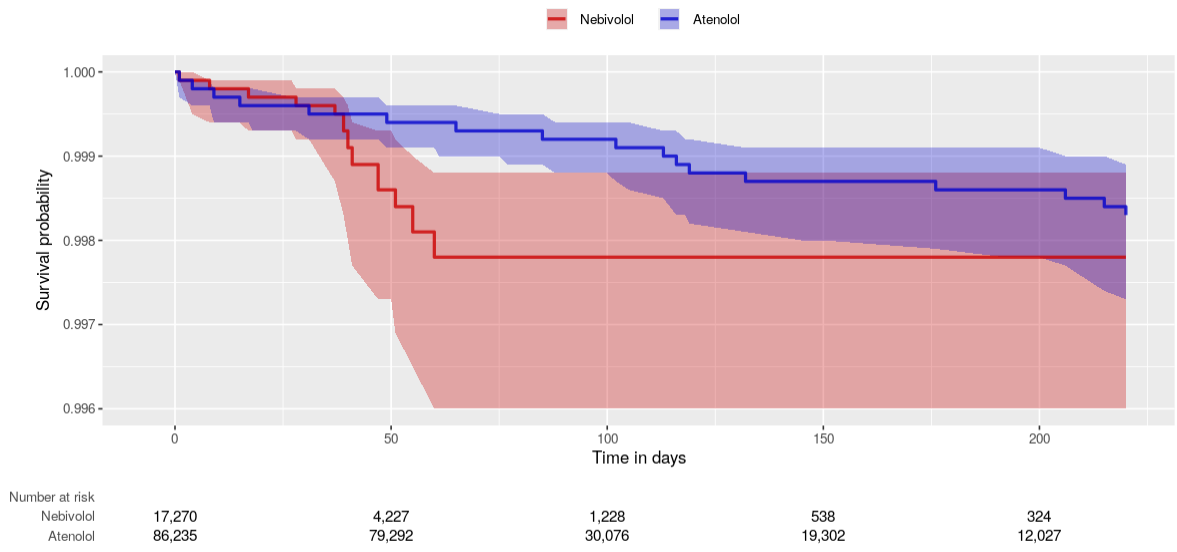

Shading in survival curves represents 95% confidence intervals.

Abbreviation: CCAE, Truven MarketScan Commercial Claims and Encounters; Optum, Optum ClinFormatics; PanTher, Optum® de-identified Electronic Health Record Dataset

**Figure S7. Kaplan-Meier plots for stroke between the third-generation beta-blockers users and atenolol users**

**Figure S7 a: Carvedilol versus atenolol in the CCAE**

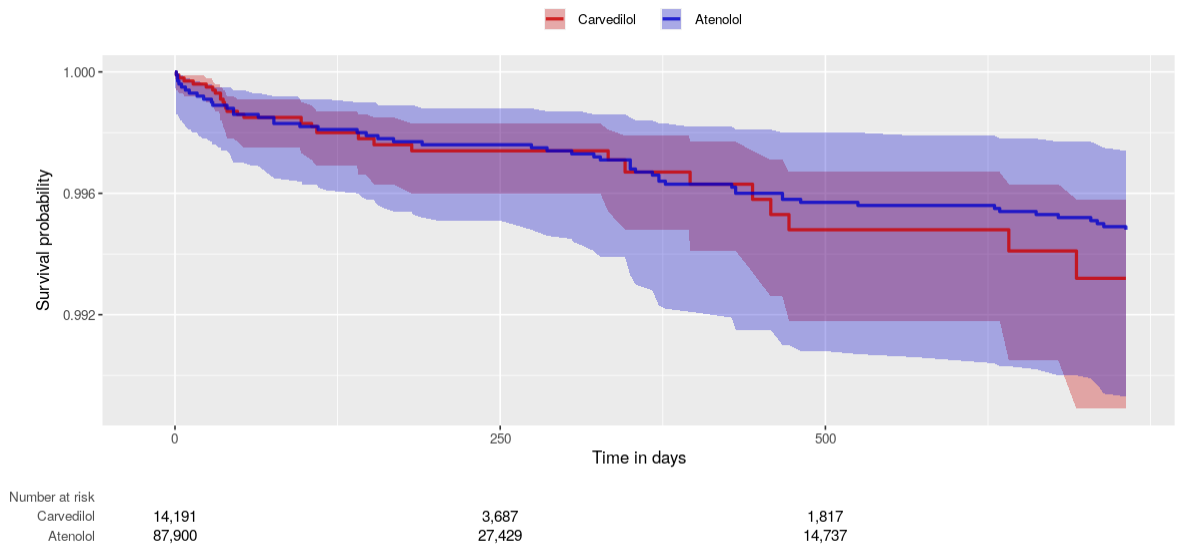

**Figure S7 b: Carvedilol versus atenolol in the PanTher**

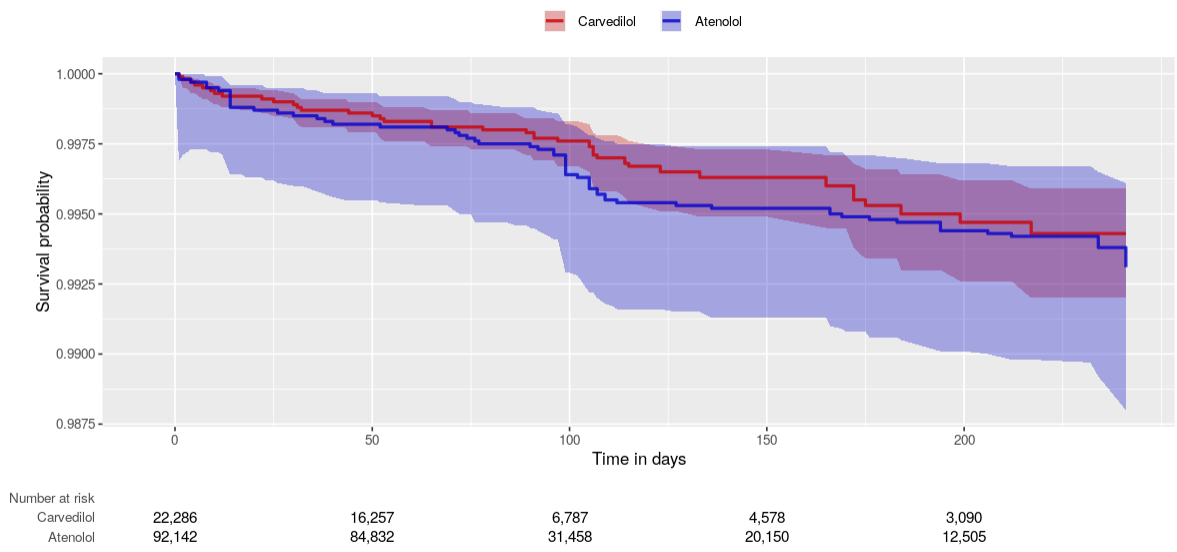



**Figure S7 c: Nebivolol versus atenolol in the CCAE**

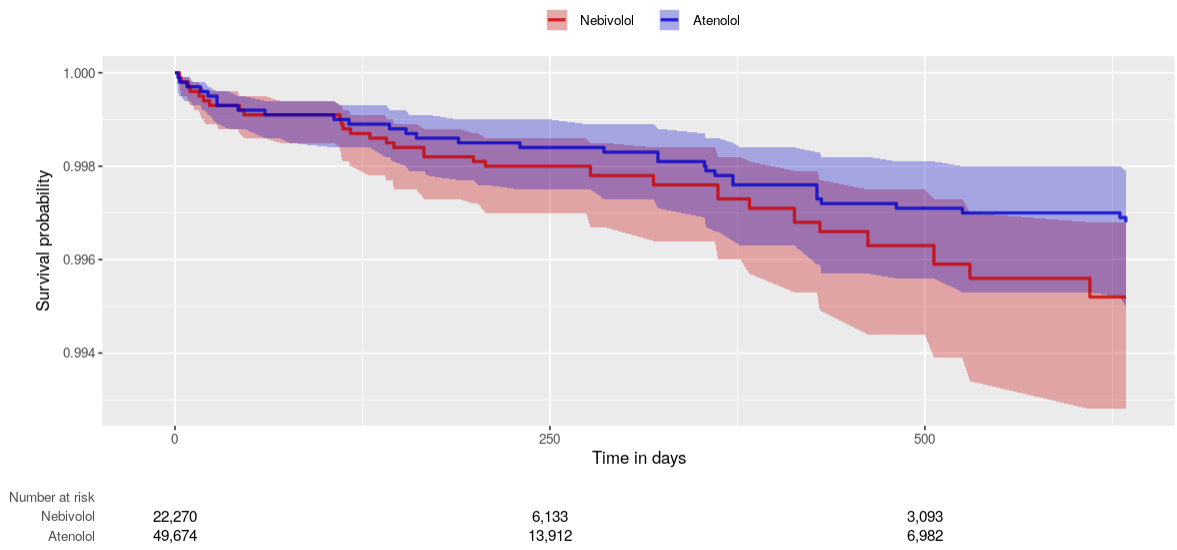

**Figure S7 d: Nebivolol versus atenolol in the Optum**

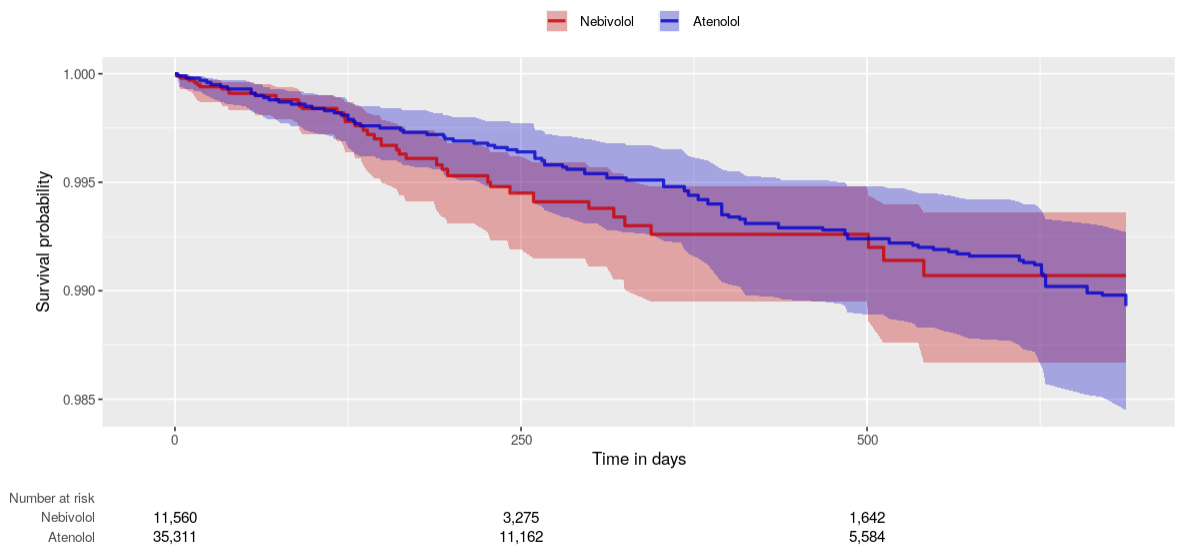

**Figure S7 e: Nebivolol versus atenolol in the PanTher**

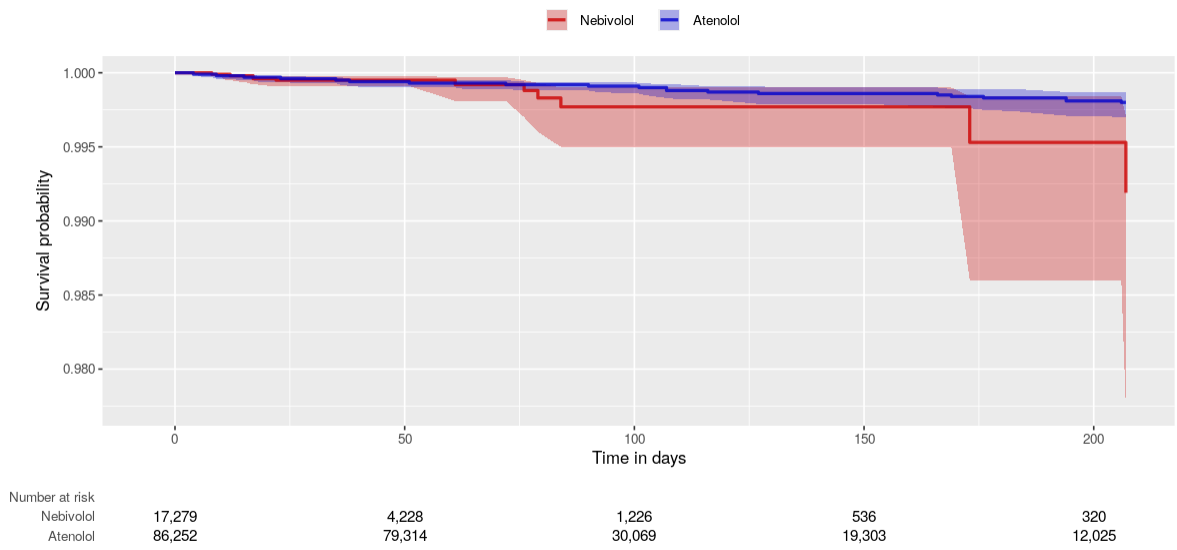

Shading in survival curves represents 95% confidence intervals.

Abbreviation: CCAE, Truven MarketScan Commercial Claims and Encounters; Optum, Optum ClinFormatics; PanTher, Optum® de-identified Electronic Health Record Dataset

**Figure S8. Kaplan-Meier plots for hospitalization for heart failure the third-generation beta-blockers users and atenolol users**

**Figure S8 a: Carvedilol versus atenolol in the CCAE**

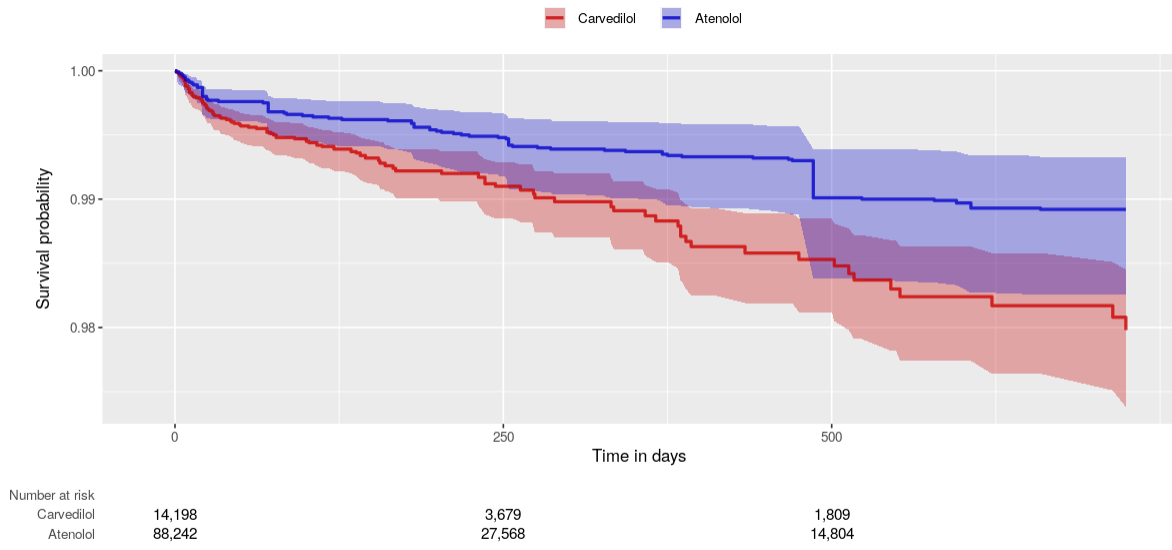

**Figure S8 b: Carvedilol versus atenolol in the PanTher**

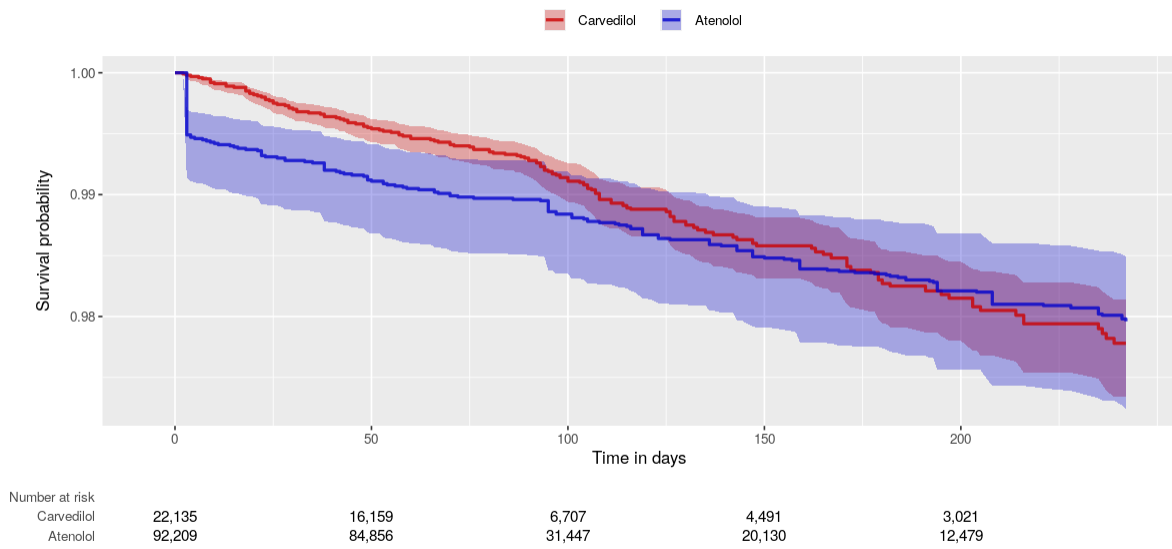

**Figure S8 c: Nebivolol versus atenolol in the CCAE**

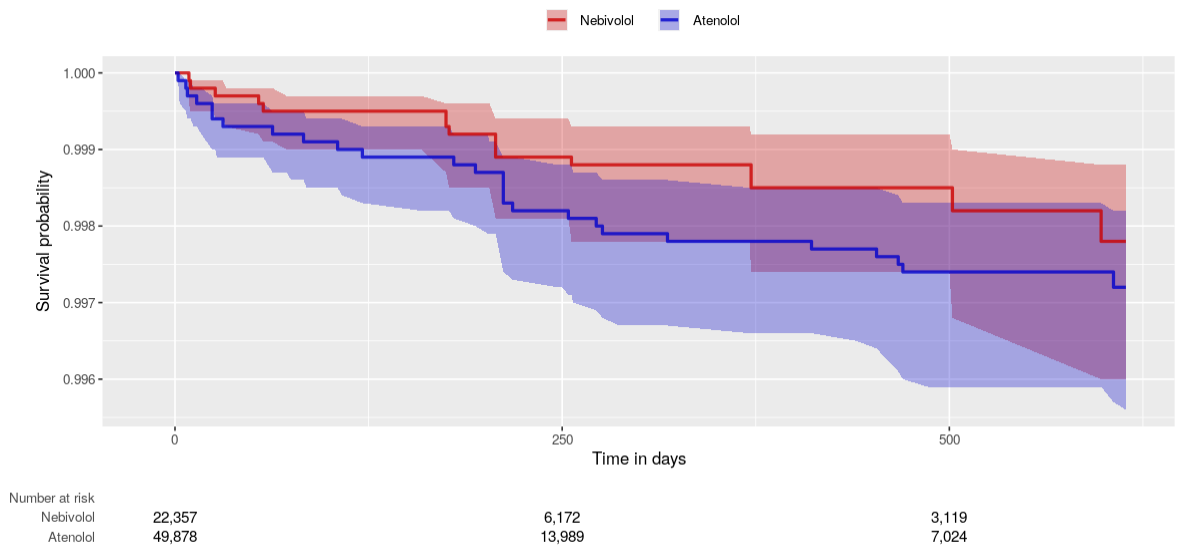

**Figure S8 d: Nebivolol versus atenolol in the Optum**

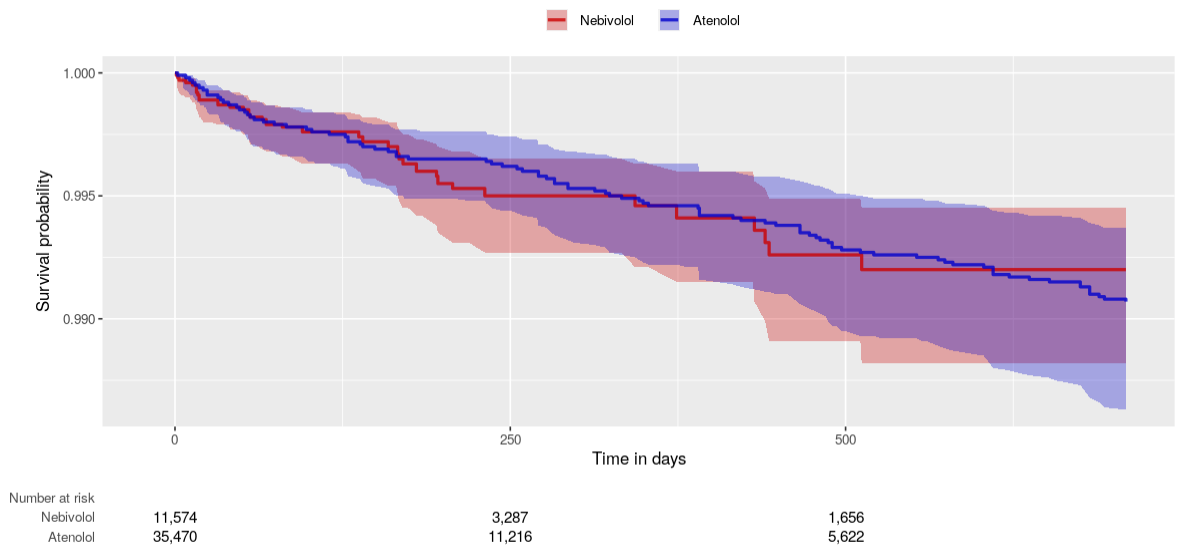

**Figure S8 e: Nebivolol versus atenolol in the PanTher**

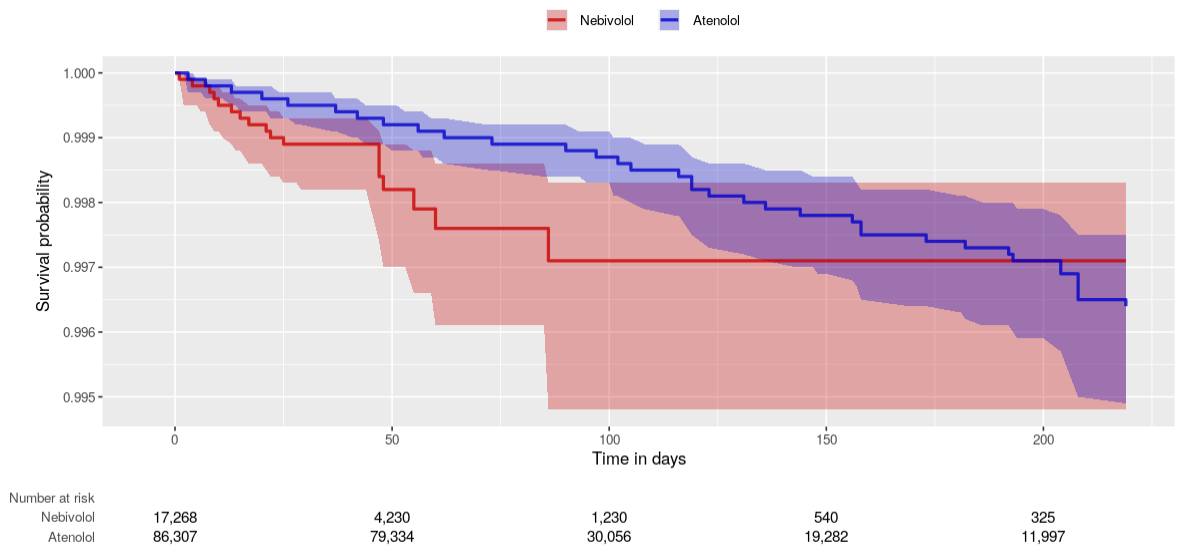

Shading in survival curves represents 95% confidence intervals.

Abbreviation: CCAE, Truven MarketScan Commercial Claims and Encounters; Optum, Optum ClinFormatics; PanTher, Optum® de-identified Electronic Health Record Dataset

**Figure S9. The meta-analytic HR estimates and their 95% CIs comparing the relative risk of acute myocardial infarction, stroke, and hospitalization for heart failure between third-generation beta-blockers and atenolol (PS stratification or ITT)**

**Figure S9 a: PS matching, ITT**

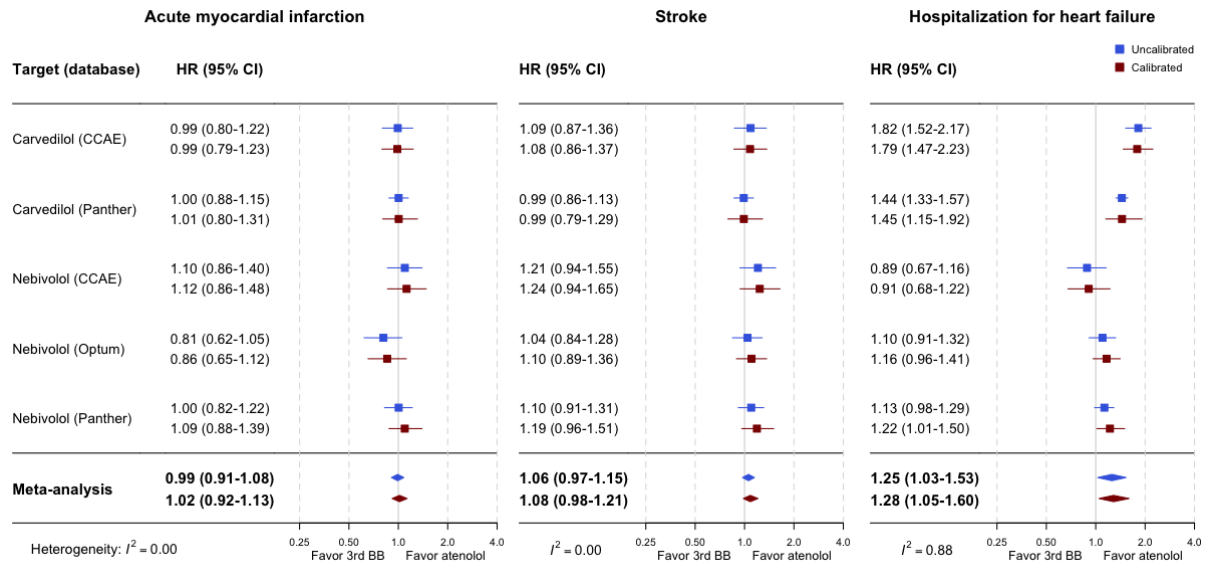

**Figure S9 b: PS stratification, on-treatment**

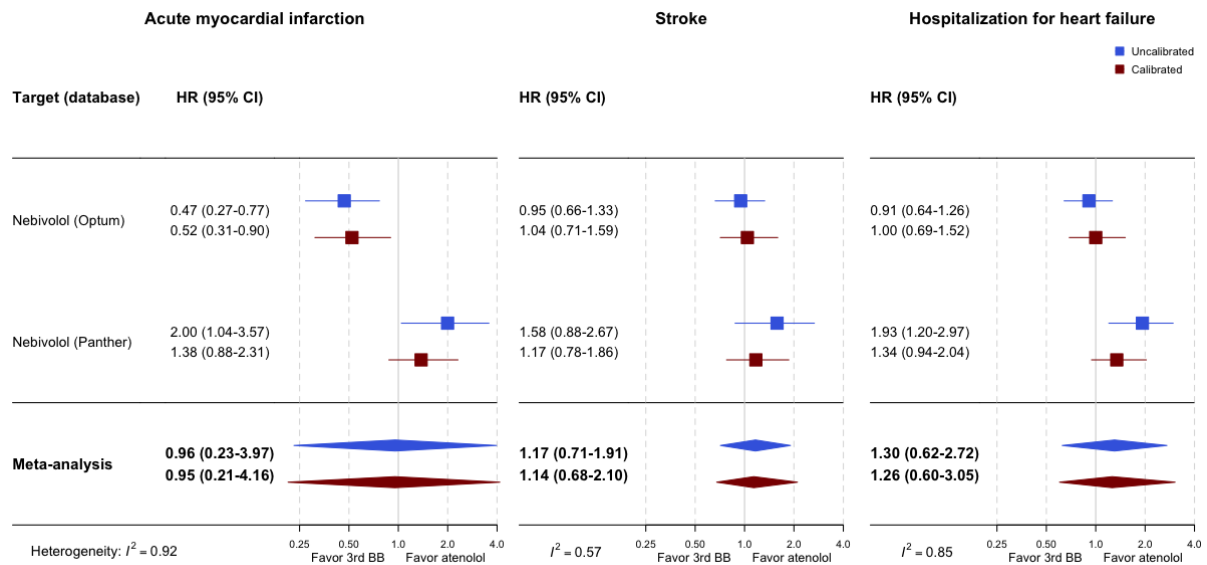

**Figure S9 c: PS stratification, ITT**

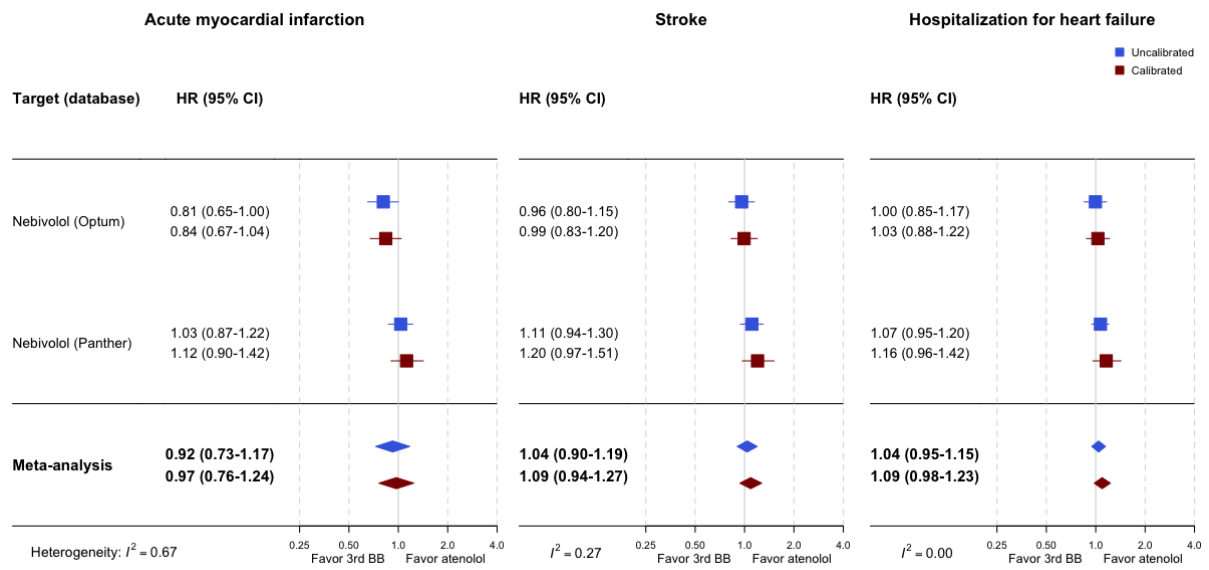

Abbreviation: HR, hazard ratio; CI, confidence interval; PS, propensity score; ITT, intention-to-treat; CCAE, Truven MarketScan Commercial Claims and Encounters; Optum, Optum ClinFormatics; PanTher, Optum® de-identified Electronic Health Record Dataset

# Figure S10 Meta-analysis including results without sufficient balance or empirical equipoise between third-generation beta-blockers and atenolol

## Figure S10 a: PS matching, on-treatment

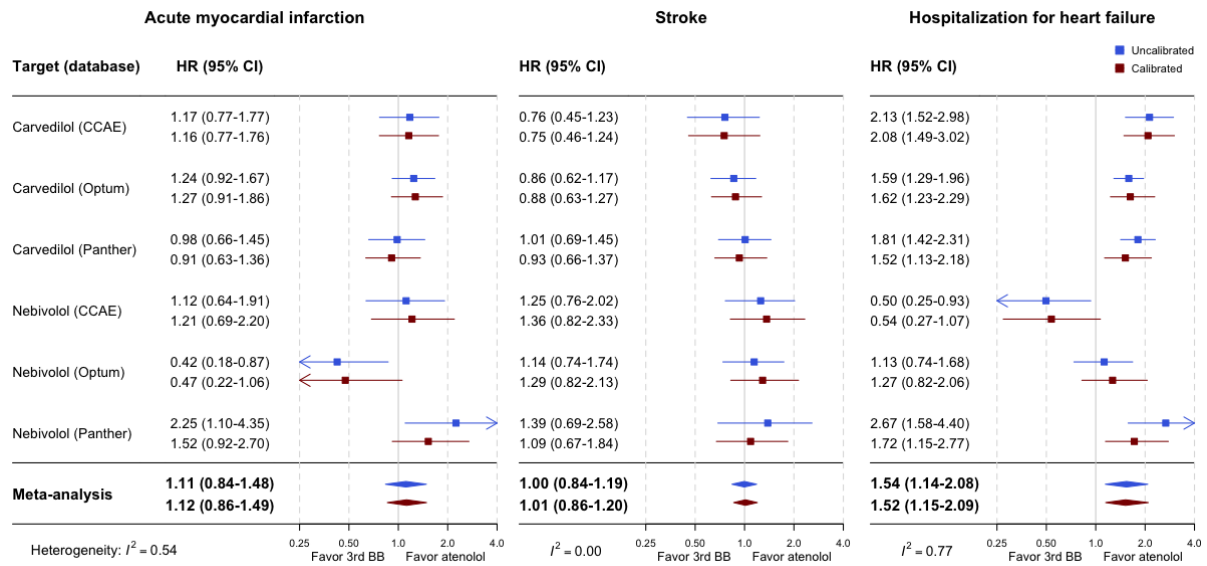

## Figure S10 b: PS matching, ITT

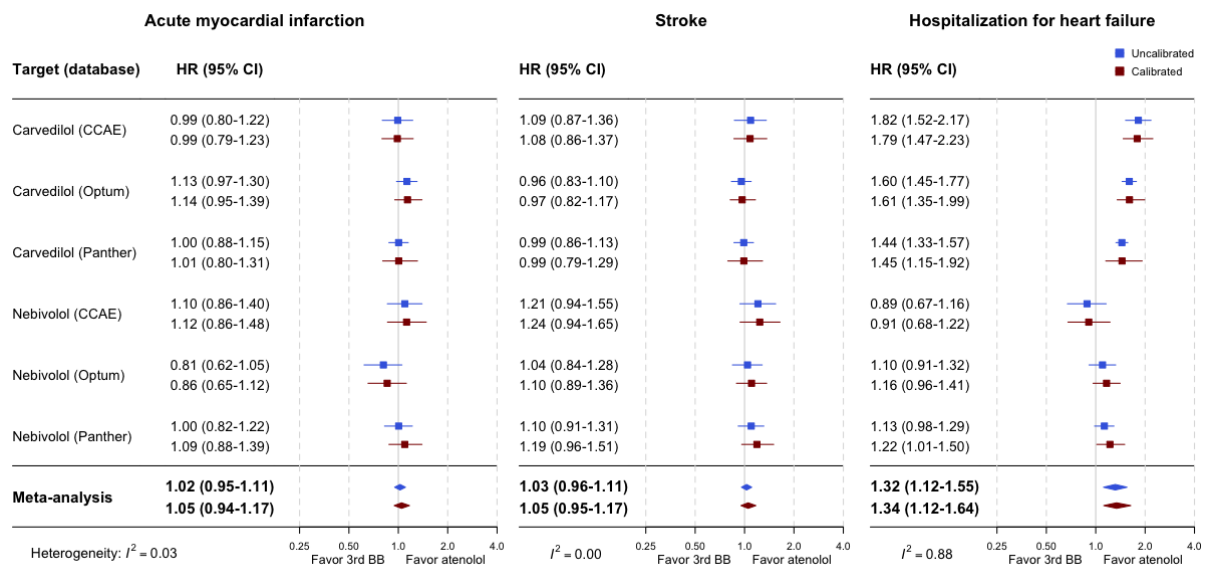



**Figure S10 c: PS stratification, on-treatment**

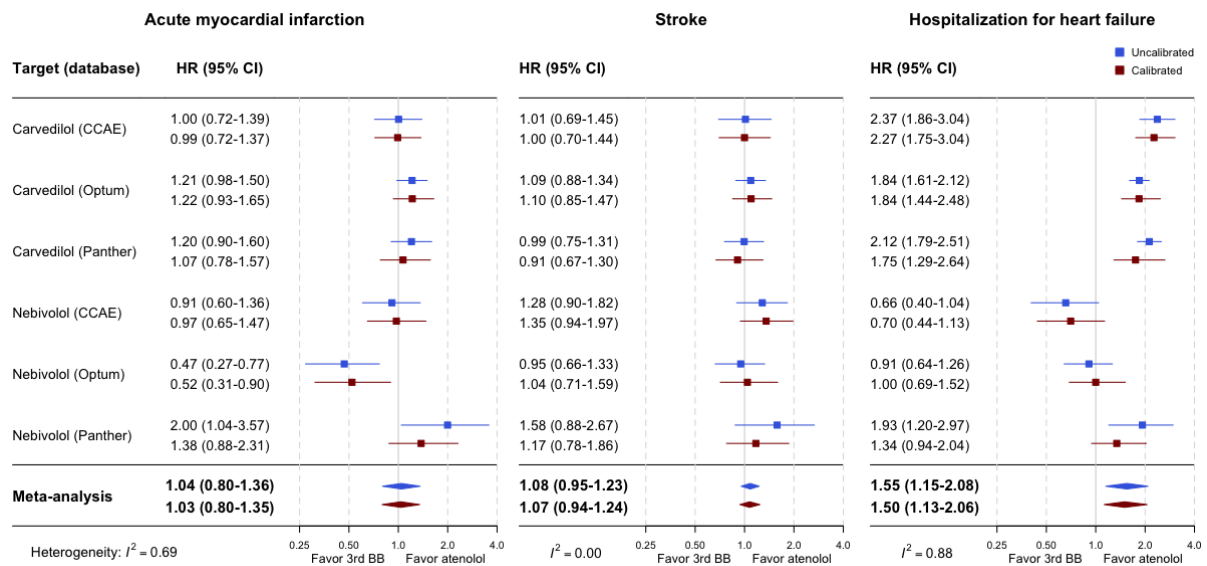

**Figure S10 d: PS stratification, ITT**

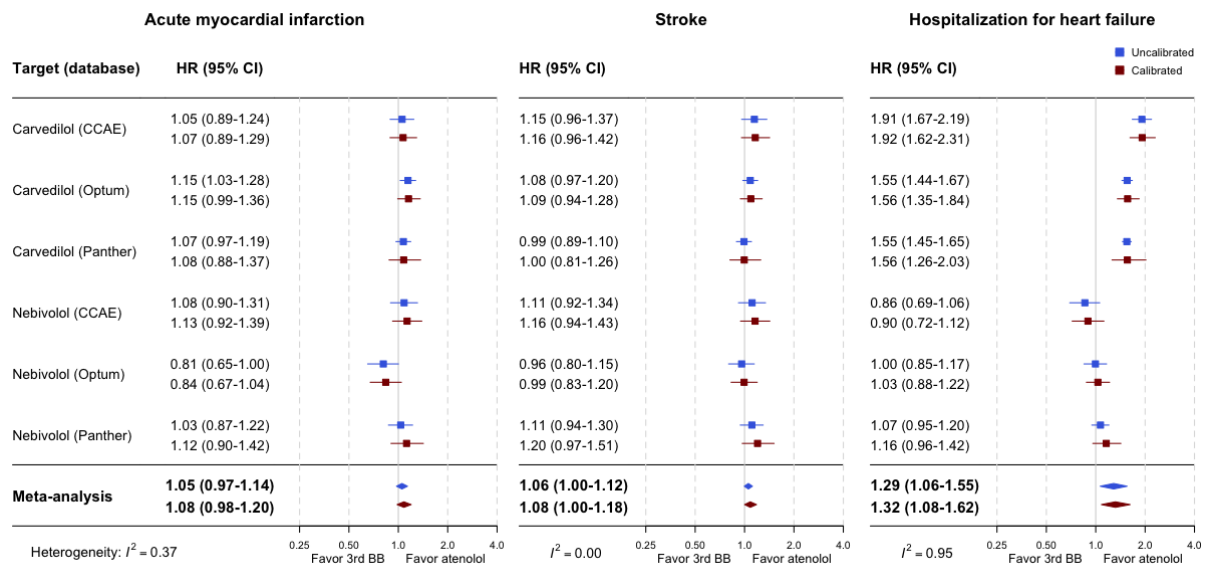

Abbreviation: HR, hazard ratio; CI, confidence interval; PS, propensity score; ITT, intention-to-treat; CCAEC, Truven MarketScan Commercial Claims and Encounters; Optum, Optum ClinFormatics; PanTher, Optum® de-identified Electronic Health Record Dataset

**Figure S11. The meta-analytic HR estimates and their 95% CIs comparing the relative risk of acute myocardial infarction, stroke, and hospitalization for heart failure between atenolol versus other classes (PS matching, on-treatment)**

**Figure S11 a: atenolol versus angiotensin-converting enzyme inhibitors**

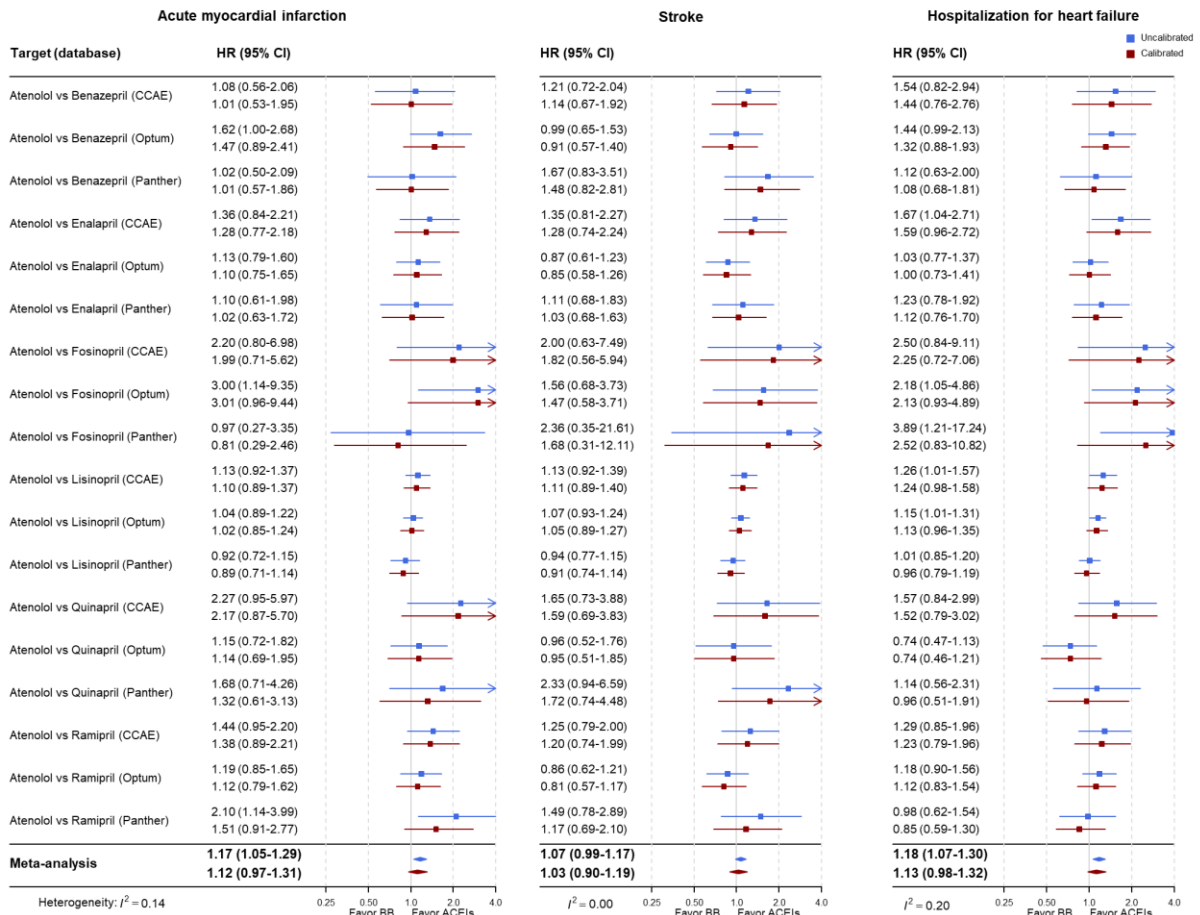

**Figure S11 b: atenolol versus angiotensin receptor blockers**

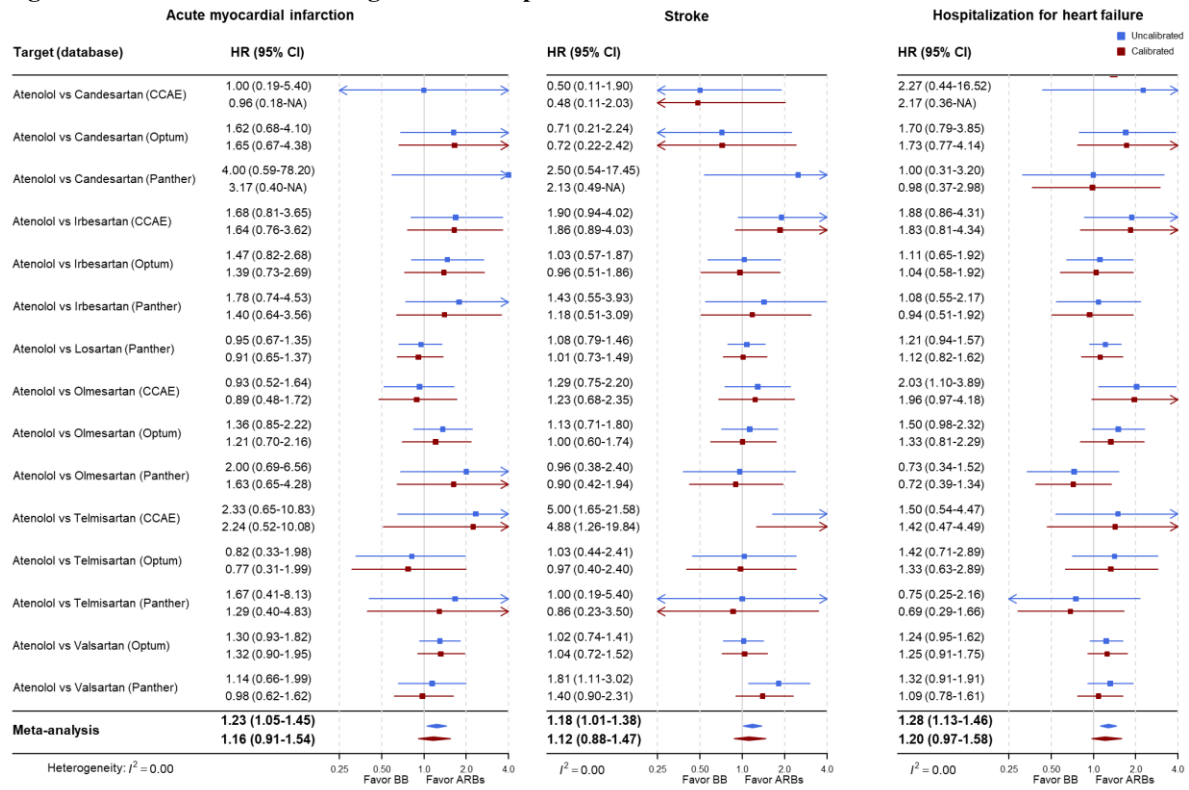

**Figure S11 c: atenolol versus calcium-channel blockers**

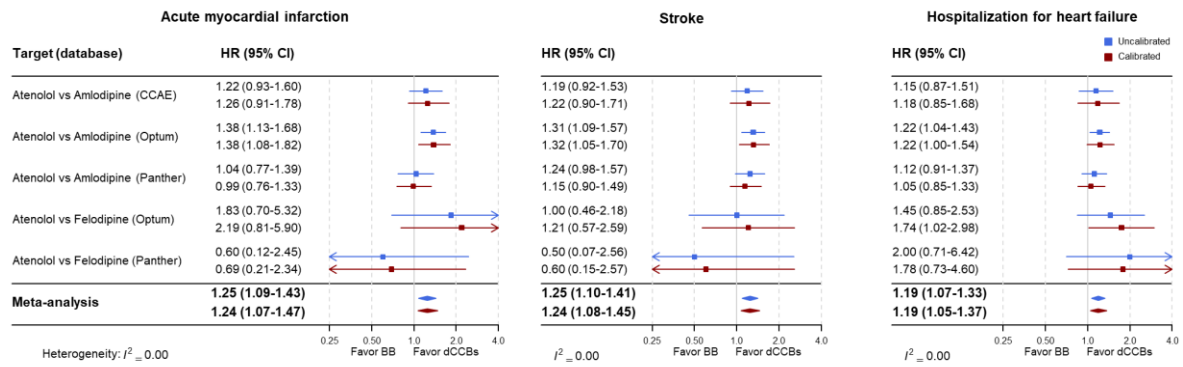

**Figure S11 d: atenolol versus thiazide or thiazide-like diuretics**

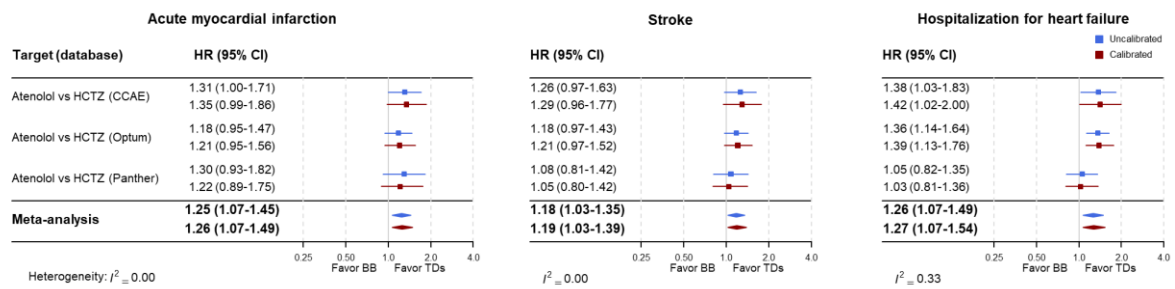

Abbreviation: HR, hazard ratio; CI, confidence interval; PS, propensity score; CCAE, Truven MarketScan Commercial Claims and Encounters; Optum, Optum ClinFormatics; PanTher, Optum® de-identified Electronic Health Record Dataset; HCTZ, hydrochlorothiazide

**Figure S12. The meta-analytic HR estimates and their 95% CIs comparing the relative risk of acute myocardial infarction, stroke, and hospitalization for heart failure between third-generation beta-blockers versus other classes (PS matching, on-treatment)**

**Figure S12 a: third-generation beta-blockers versus angiotensin-converting enzyme inhibitors**

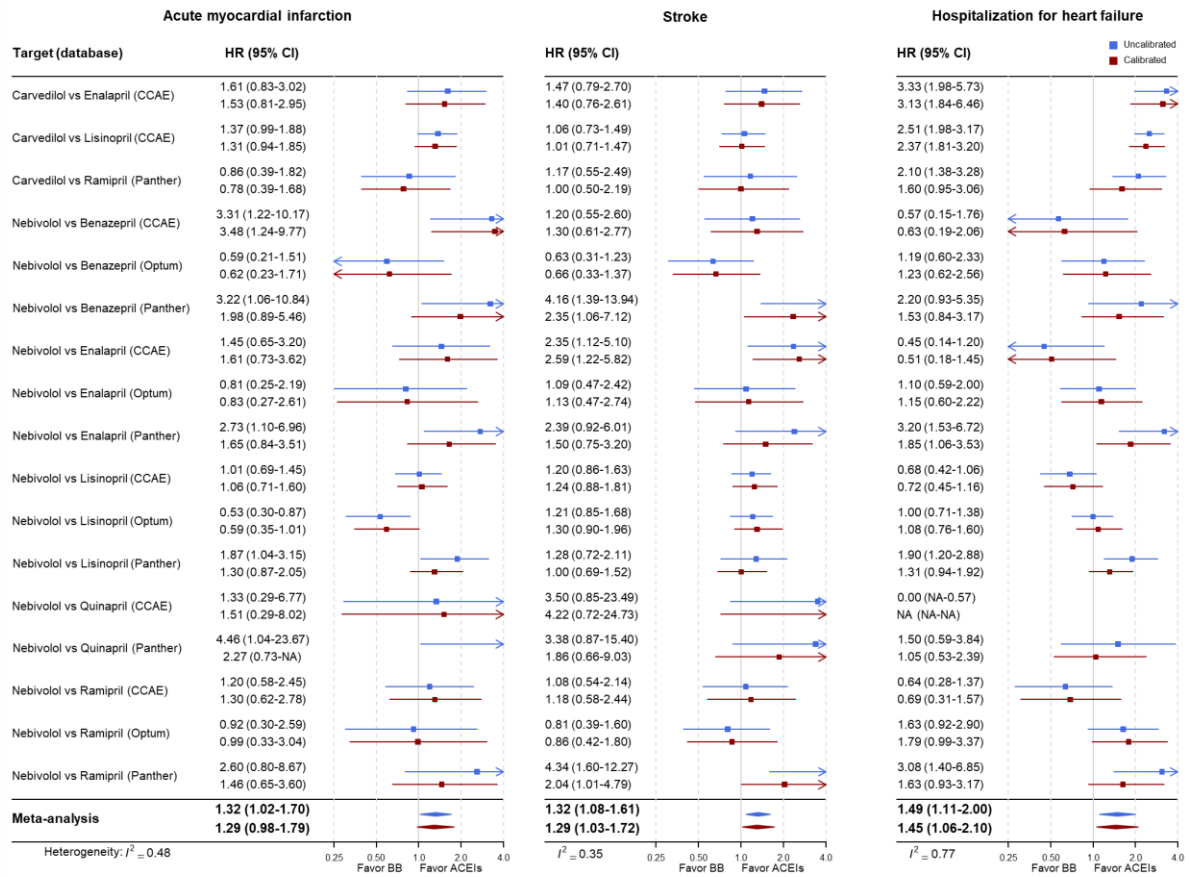

**Figure S12 b: third-generation beta-blockers versus angiotensin receptor blockers**

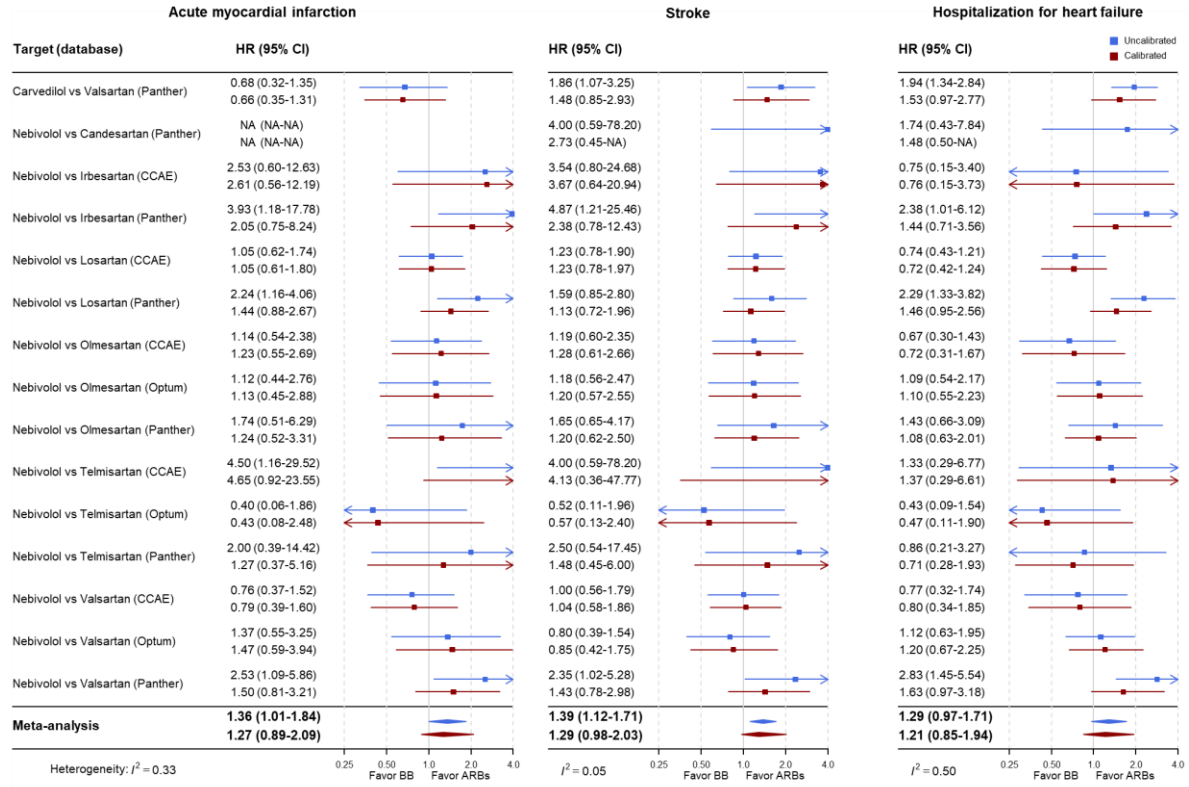

**Figure S12 c: third-generation beta-blockers versus calcium-channel blockers**

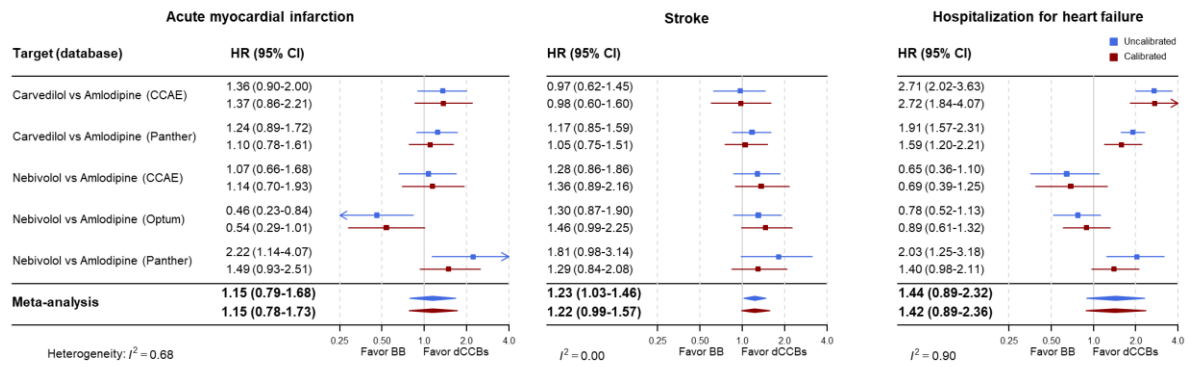

**Figure S12 d: third-generation beta-blockers versus thiazide or thiazide-like diuretics**

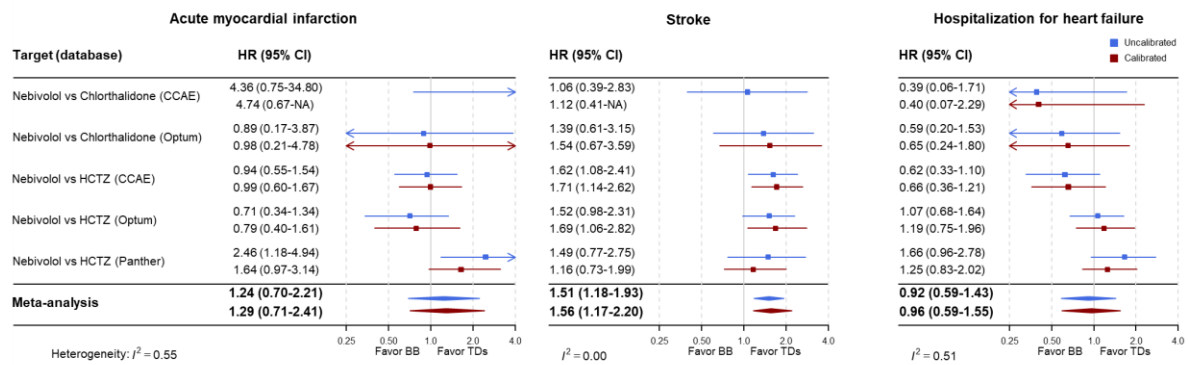

Abbreviation: HR, hazard ratio; CI, confidence interval; PS, propensity score; CCAE, Truven MarketScan Commercial Claims and Encounters; Optum, Optum ClinFormatics; PanTher, Optum® de-identified Electronic Health Record Dataset; HCTZ, hydrochlorothiazide

**Figure S13. The meta-analytic HR estimates and their 95% CIs comparing the relative risk of acute myocardial infarction, stroke, and hospitalization for heart failure between metoprolol versus atenolol, carvedilol, and nebivolol (PS matching, on-treatment)**

**Figure S13 a: metoprolol versus atenolol**

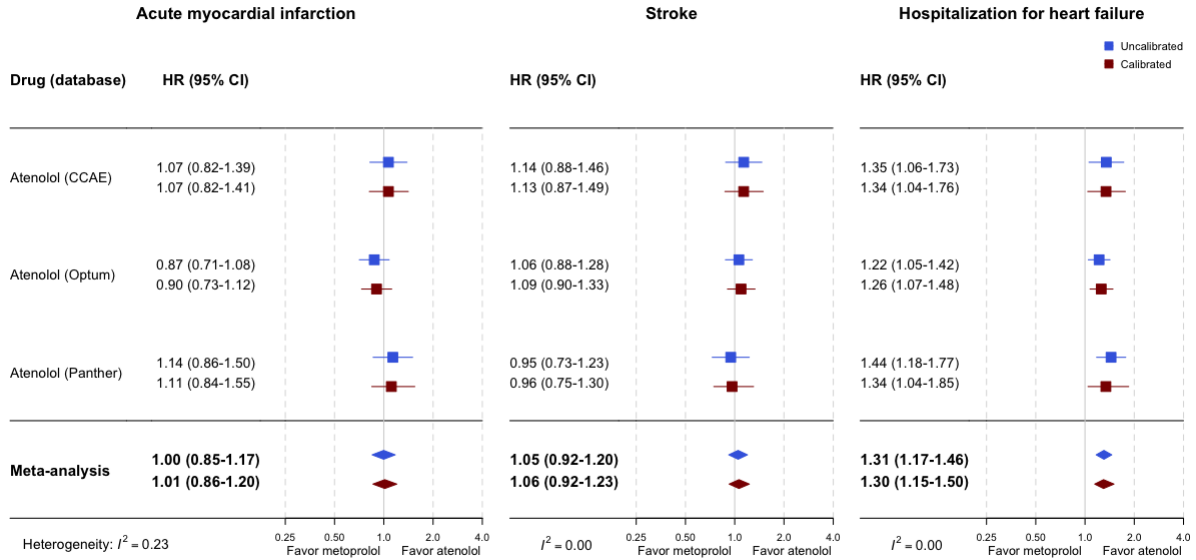

**Figure S13 b: metoprolol versus carvedilol**

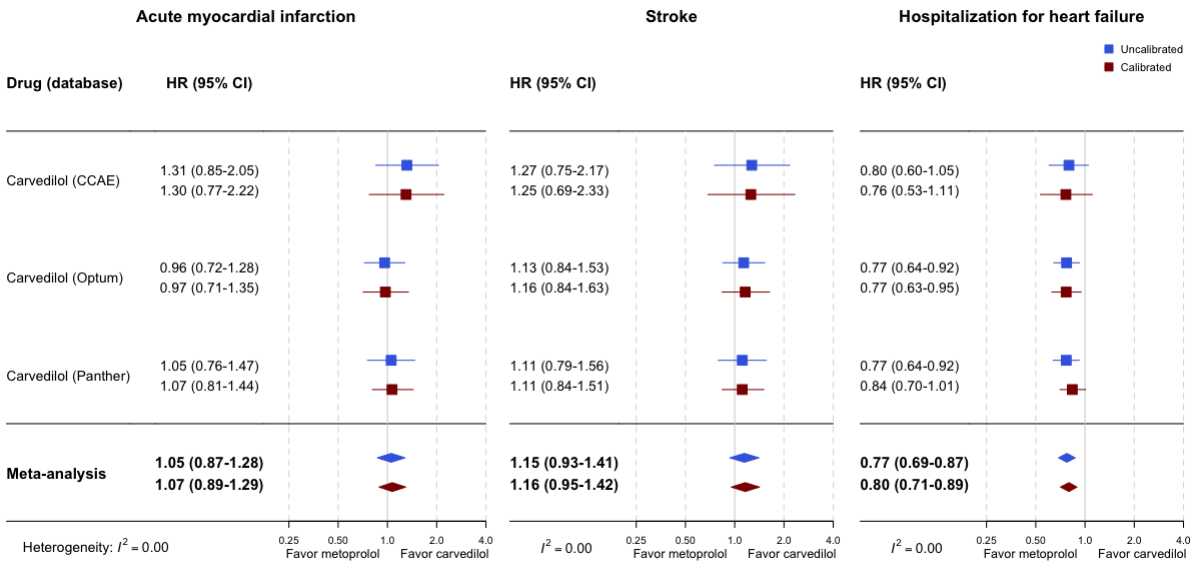



**Figure S13 c: metoprolol versus nebivolol**

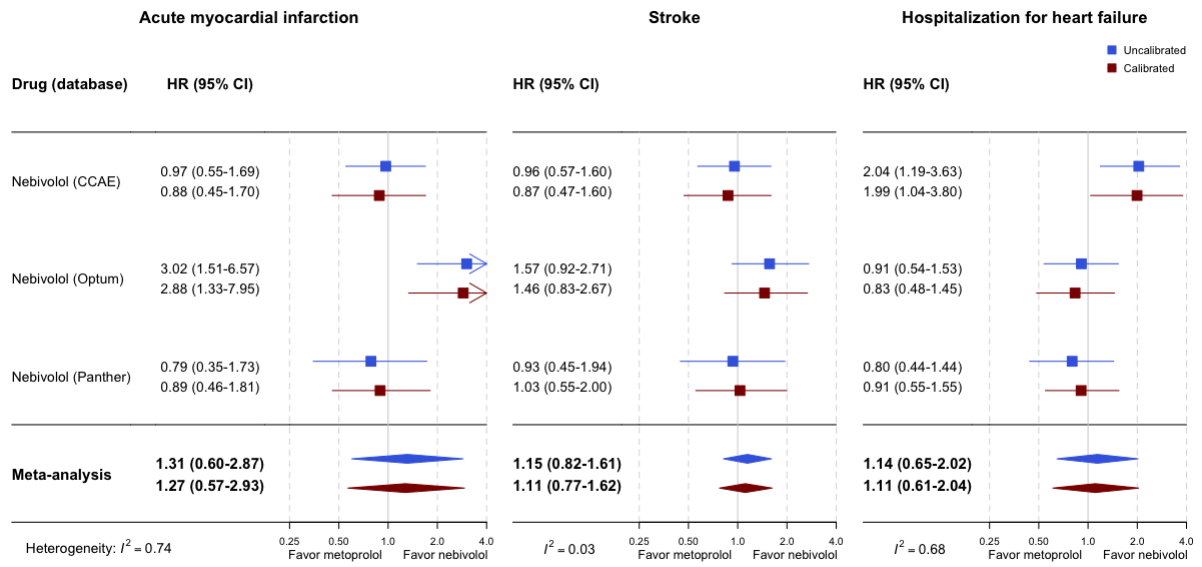

**Figure S14. Meta-analytic results of secondary outcomes comparing nebivolol versus atenolol and other classes**

**Figure S14 a: PS stratification, on-treatment**

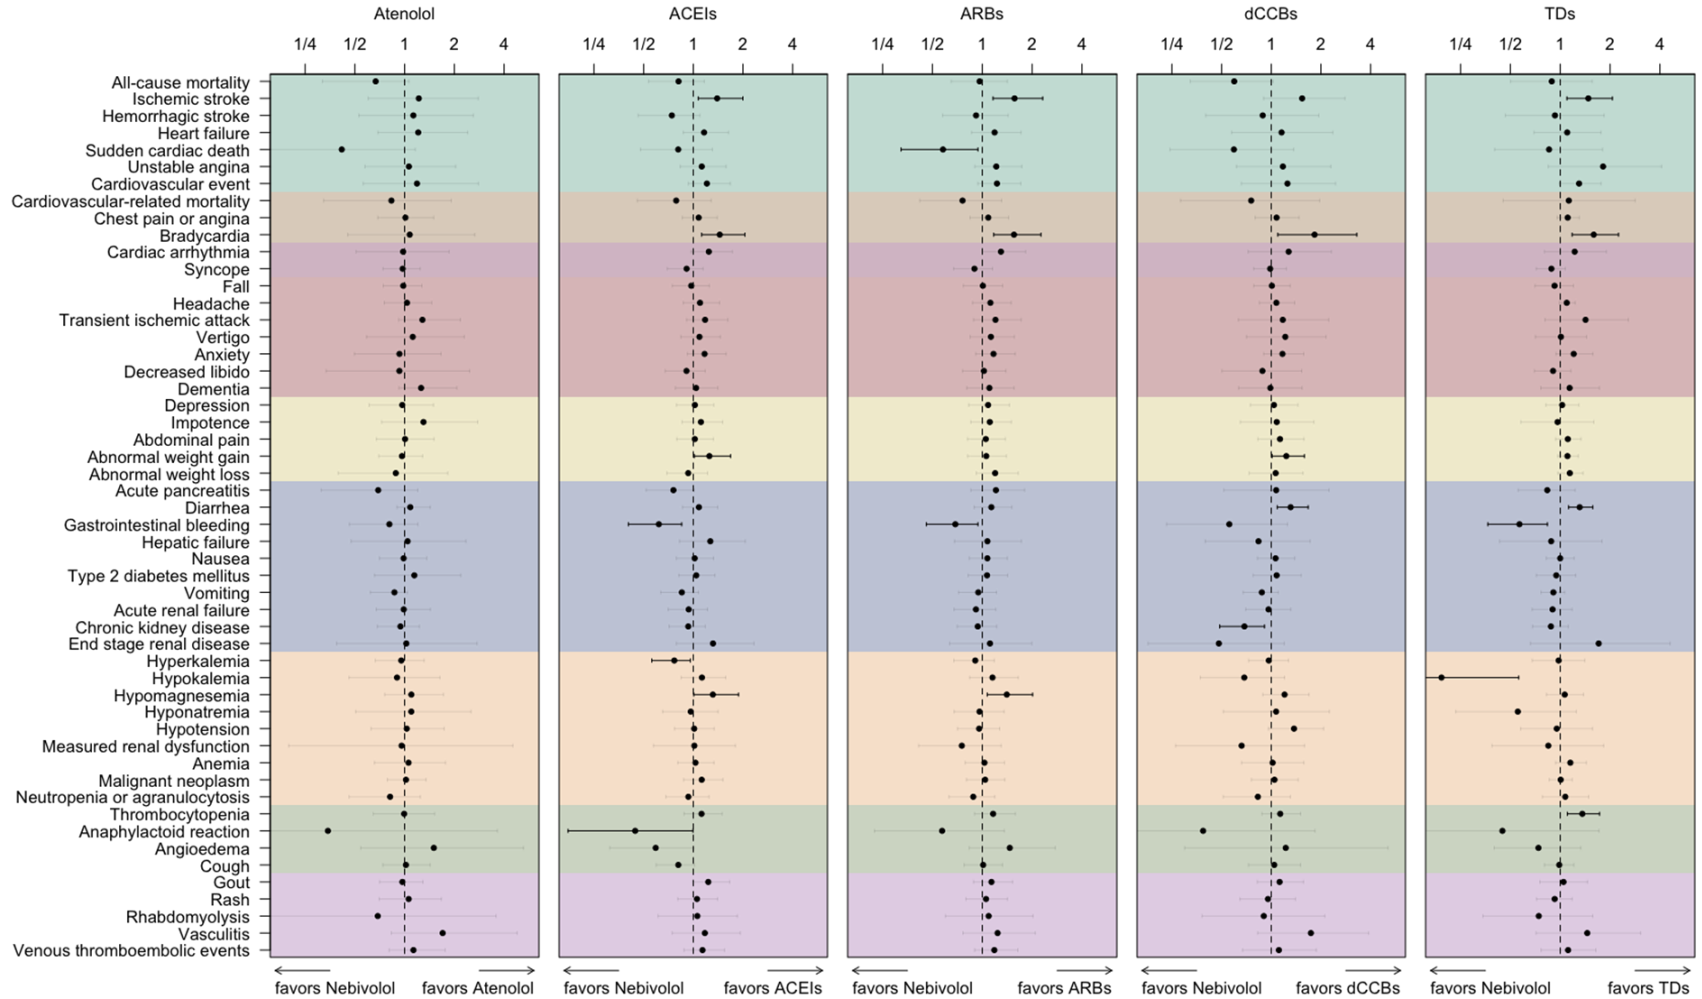

Figure S14 b: PS matching, intention-to-treat

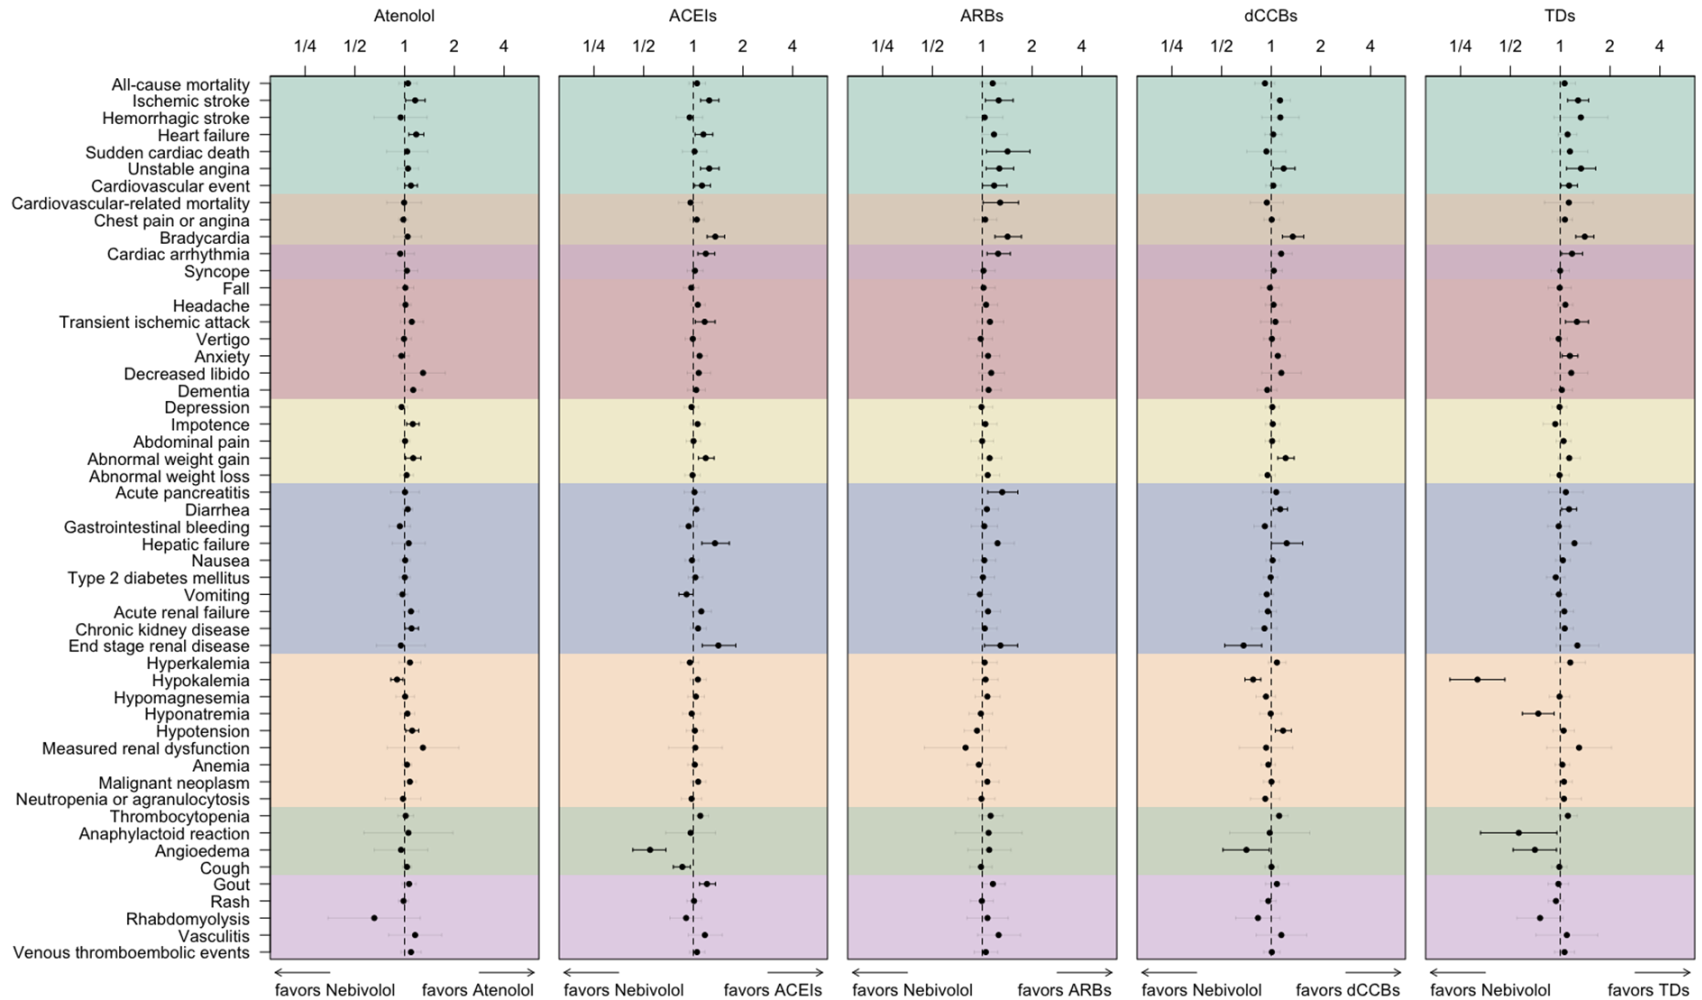

**Figure S14 c: PS stratification, intention-to-treat**

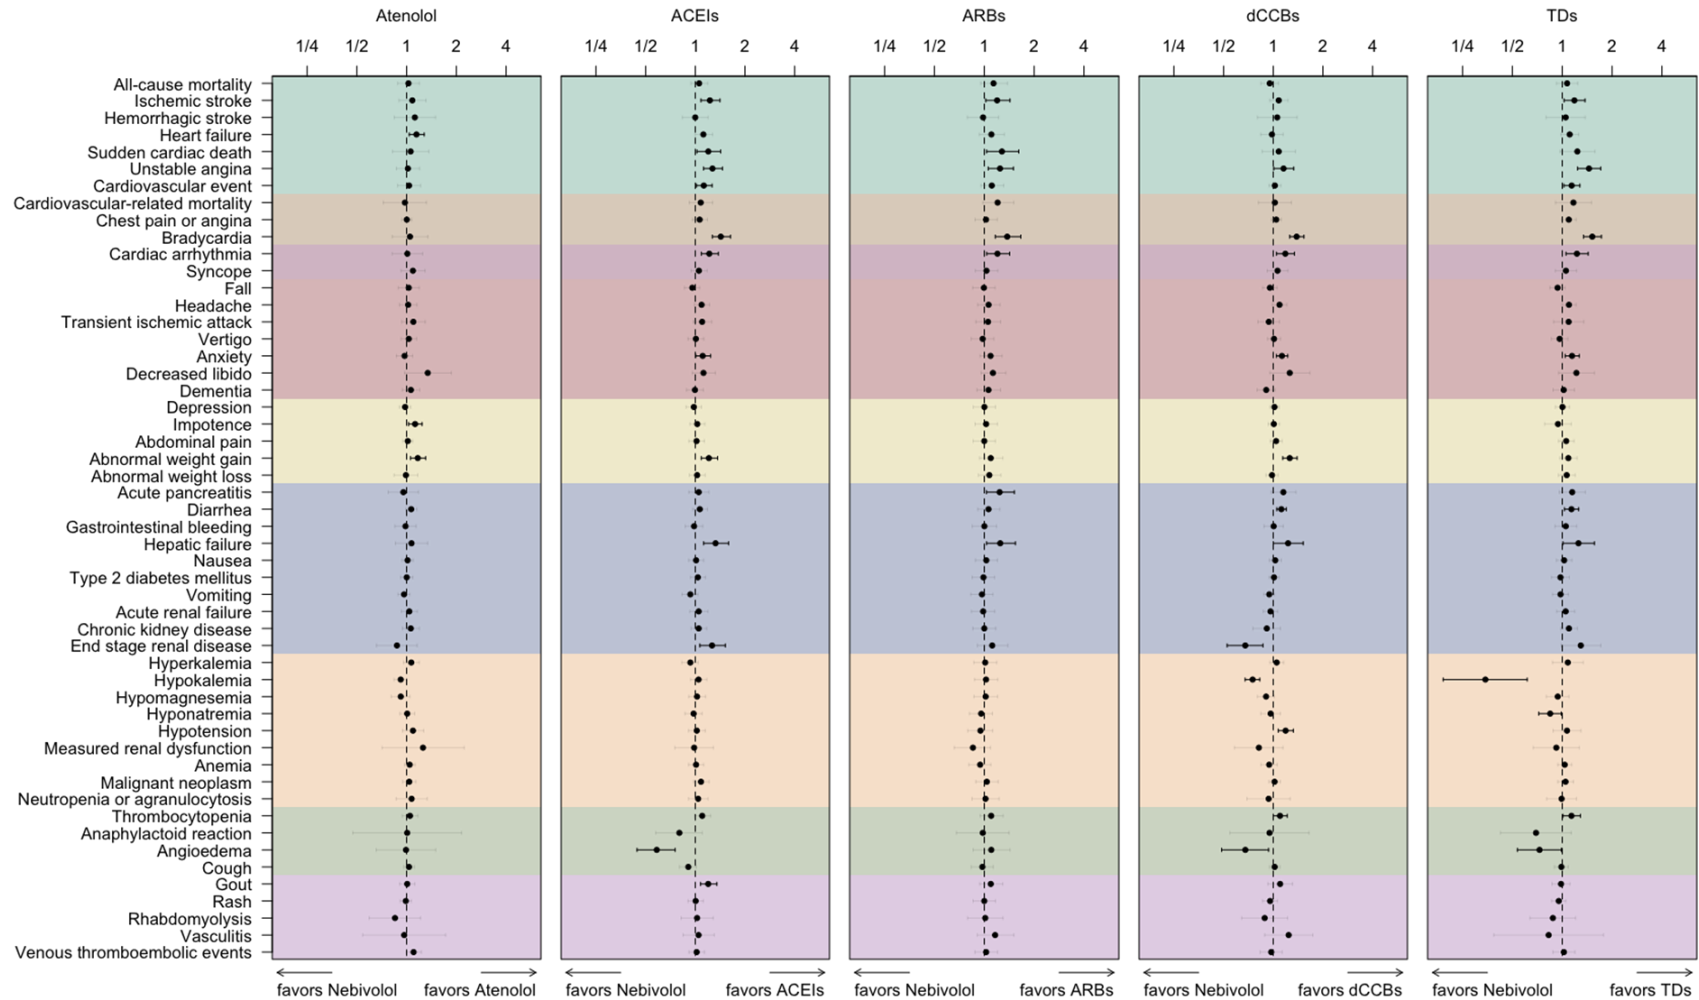

Meta-analytic results comparing the nebivolol versus atenolol and other classes (ACEI, ARB, dCCB, and TD) across six secondary outcomes (all-cause mortality, ischemic stroke, hemorrhagic stroke, heart failure, sudden cardiac death, unstable angina, and cardiovascular event) and 46 safety outcomes listed on product labels (PS-matching, on-treatment). Points and lines identify HR estimates with their 95% CIs,

respectively. Outcomes in grey signify that the CI covers HR of 1 (null hypothesis of no differential risk). Cardiovascular event outcome includes acute myocardial infarction, stroke, hospitalization for heart failure, and sudden cardiac death.

Abbreviations: HR, hazard ratio; CI, confidence interval; PS, propensity score; ACEIs, angiotensin-converting enzyme inhibitors; ARBs, angiotensin receptor blocker; dCCBs, dihydropyridine calcium-channel blocker; TDs, thiazide, or thiazide-like diuretics
